# Supplementary material for: The role ofCaenorhabditis elegansin the discovery of natural products for healthy aging
Source: Royal Society of Chemistry journal article supplement (doi:10.1039/d3np00021d), 2023-01-01
Supplement: d3np00021d1.pdf [file d3np00021d1.pdf]

Table SI 1. Alkaloids

| Compound                                                                                                  | Structure (Smiles)                                                                                                     | Dose [Ref]                                     | Experiment              | Parameters                                                                                                | Effect                                                                                   | Involved Genes                                                       | Strain   | Treat. Start | Food                  | Media    | Treatment application                                | Vector            |
|-----------------------------------------------------------------------------------------------------------|------------------------------------------------------------------------------------------------------------------------|------------------------------------------------|-------------------------|-----------------------------------------------------------------------------------------------------------|------------------------------------------------------------------------------------------|----------------------------------------------------------------------|----------|--------------|-----------------------|----------|------------------------------------------------------|-------------------|
| Trigonelline                                                                                              | <chem>C[N+]1=CC=CC(=C1)C(=O)[O-]</chem>                                                                                | 25, 50, 100 and 200 $\mu\text{M}$ <sup>1</sup> | Lifespan                | n.d.                                                                                                      | Improved                                                                                 | aak-2, daf-16, hsf-1, clk-1, mev-1, isp-1, eat-2, sir-2.1, and rsk-1 | N2       | L4           | Heat-inactivated OP50 | NGM agar | NGM plates with compound were equilibrated overnight | 0% DMSO           |
|                                                                                                           |                                                                                                                        |                                                |                         | n.d.                                                                                                      | Improved                                                                                 |                                                                      | CL2006   |              |                       |          |                                                      |                   |
|                                                                                                           |                                                                                                                        |                                                | Locomotion              | Number of body bends                                                                                      | Improved                                                                                 |                                                                      | N2       |              |                       |          |                                                      |                   |
|                                                                                                           |                                                                                                                        |                                                | Autofluorescence        | Microscopy and image processing (360-370/420-460 nm filter)                                               | Improved                                                                                 |                                                                      |          |              |                       |          |                                                      |                   |
|                                                                                                           |                                                                                                                        |                                                | Antioxidative capacity  | Measurement of dichlorofluorescein fluorescence                                                           | Improved                                                                                 |                                                                      |          |              |                       |          |                                                      |                   |
|                                                                                                           |                                                                                                                        |                                                | ROS stress survival     | Induced with 20mM paraquat                                                                                | Improved                                                                                 |                                                                      |          |              |                       |          |                                                      |                   |
|                                                                                                           |                                                                                                                        |                                                | Thermal stress survival | Induced with 35 °C                                                                                        | Improved                                                                                 |                                                                      |          |              |                       |          |                                                      |                   |
|                                                                                                           |                                                                                                                        |                                                | Proteotoxicity          | Quantification of YFP tagged polyglutamine expression in muscles by microscopy and image processing       | Improved                                                                                 |                                                                      | AM140    |              |                       |          |                                                      |                   |
|                                                                                                           |                                                                                                                        |                                                |                         | Paralysis assay with temperature-dependent amyloid beta expression in muscles                             | Improved                                                                                 |                                                                      | CL4176   | L1           |                       |          |                                                      |                   |
| Quantification of YFP tagged $\alpha$ -synuclein expression in muscles by microscopy and image processing | Improved                                                                                                               | NL5901                                         |                         | L4                                                                                                        |                                                                                          |                                                                      |          |              |                       |          |                                                      |                   |
| 6-OHDA induced neurodegeneration monitored by GFP tagged dopamine transporter expression                  | Improved                                                                                                               | BZ555                                          |                         | L3                                                                                                        |                                                                                          |                                                                      |          |              |                       |          |                                                      |                   |
| Caffeine                                                                                                  | <chem>CN1C=NC2=C1C(=O)N(C(=O)N2)C</chem>                                                                               | 50 $\mu\text{M}$ <sup>2</sup>                  | Lifespan                | Death Time 50 (DT50)                                                                                      | No effect                                                                                | n.d.                                                                 | N2       | L4           | OP50                  | S medium | Diluted in liquid                                    | 1% DMSO           |
|                                                                                                           |                                                                                                                        |                                                | 1 mM <sup>3</sup>       | Proteotoxicity                                                                                            | Paralysis assay with temperature-dependent amyloid beta expression in muscles            | Improved                                                             | n.d.     | CL4176       | L1                    | OP50     | Liquid NGM                                           | Diluted in liquid |
|                                                                                                           |                                                                                                                        | 3.6 mM <sup>4</sup>                            | Proteotoxicity          | Paralysis assay with constitutive age -dependent polyglutamine aggregation in muscles                     | Improved                                                                                 | hsf-1                                                                | AM140    | L1           | OP50                  | NGM agar | Diluted in NGM                                       | 0% DMSO           |
|                                                                                                           |                                                                                                                        |                                                |                         | Quantification of YFP tagged polyglutamine expression in muscles by microscopy and image processing       | Improved                                                                                 |                                                                      |          |              |                       |          |                                                      |                   |
| Huperzine A                                                                                               | <chem>CC=C1[C@@H]2C3=C([C@]1(CC(=C2)C)N)C=CC(=O)N3</chem>                                                              | 300 $\mu\text{M}$ <sup>5</sup>                 | Lifespan                | Mean lifespan                                                                                             | Improved                                                                                 | n.d.                                                                 | N2       | L4           | OP50                  | NGM agar | Diluted into OP50 stock                              | n.d.              |
| Fargesine                                                                                                 | <chem>C[N+]1(CCC=CNC3=C2C(=C(C=C3)O)C1)[O-]</chem>                                                                     | 25 and 100 $\mu\text{M}$ <sup>6</sup>          | Locomotion              | Motility classes                                                                                          | Improved                                                                                 | ser-1, mtl-2                                                         | N2       | L4           | OP50                  | S medium | Diluted in liquid                                    | 1% DMSO           |
|                                                                                                           |                                                                                                                        |                                                | Pharyngeal Pumping      | Pumping rate                                                                                              | Detrimental                                                                              |                                                                      |          | A            |                       |          |                                                      |                   |
|                                                                                                           |                                                                                                                        |                                                | Proteotoxicity          | Paralysis assay with temperature-dependent amyloid beta expression in muscles                             | Improved                                                                                 |                                                                      | CL2659   | L3           |                       |          |                                                      |                   |
|                                                                                                           |                                                                                                                        |                                                |                         | Quantification of YFP tagged $\alpha$ -synuclein expression in muscles with microplate reader             | Improved                                                                                 |                                                                      | NL5901   | L4           |                       |          |                                                      |                   |
| Nemorosine A                                                                                              | <chem>C[N+](CC1)=CC2=C(O)C=CC3=C2C1=CN3</chem>                                                                         | 25 and 100 $\mu\text{M}$ <sup>6</sup>          | Locomotion              | Motility classes                                                                                          | Improved                                                                                 | ser-1, mtl-2                                                         | N2       | L4           | OP50                  | S medium | Diluted in liquid                                    | 1% DMSO           |
|                                                                                                           |                                                                                                                        |                                                | Pharyngeal Pumping      | Pumping rate                                                                                              | Detrimental                                                                              |                                                                      |          | A            |                       |          |                                                      |                   |
|                                                                                                           |                                                                                                                        |                                                | Proteotoxicity          | Paralysis assay with temperature-dependent amyloid beta expression in muscles                             | Improved                                                                                 |                                                                      | CL2659   | L3           |                       |          |                                                      |                   |
|                                                                                                           |                                                                                                                        |                                                |                         | Quantification of YFP tagged $\alpha$ -synuclein expression in muscles with microplate reader             | Improved                                                                                 |                                                                      | NL5901   | L4           |                       |          |                                                      |                   |
| Peiminine                                                                                                 | <chem>C[C@H]1CC[C@H]2[C@@]([C@H]3C[C@@H]4[C@H]([C@@H]3CN2C1)C[C@H]5[C@H]4C(C(=O)[C@@H]6[C@@]5(CC[C@@H](C6)O)C)O</chem> | 50 and 250 $\mu\text{M}$ <sup>7</sup>          | Lifespan                | Mean lifespan of animals treated with 6-OHDA                                                              | Improved                                                                                 | pink-1, pdr-1, unc-59, unc-61 and iap                                | N2       | L1           | OP50                  | NGM agar | n.d.                                                 | n.d.              |
|                                                                                                           |                                                                                                                        |                                                | ROS levels              | Measurement of dichlorofluorescein fluorescence                                                           | Improved                                                                                 |                                                                      |          |              |                       |          |                                                      |                   |
|                                                                                                           |                                                                                                                        |                                                | Proteotoxicity          | Quantification of YFP tagged $\alpha$ -synuclein expression in muscles by microscopy and image processing | Improved                                                                                 |                                                                      |          |              |                       |          |                                                      |                   |
|                                                                                                           |                                                                                                                        |                                                |                         | Neurodegeneration                                                                                         | 6-OHDA induced neurodegeneration monitored by GFP tagged dopamine transporter expression |                                                                      | Improved |              |                       |          |                                                      |                   |
|                                                                                                           |                                                                                                                        |                                                | Autophagy               | GFP::LGG-1 marked autophagic vesicles were counted in seam cells                                          | Improved                                                                                 |                                                                      | DA2123   |              |                       |          |                                                      |                   |

Table SI 2. Fragment-like compounds (MW &lt; 200)

| Compound                   | Structure (Smiles)                                                                          | Dose [Ref]                            | Experiment                                                            | Parameters                                                                                     | Effect                                   | Involved Genes                    | Strain                                           | Treat. Start | Food | Media    | Treatment application     | Vector    |
|----------------------------|---------------------------------------------------------------------------------------------|---------------------------------------|-----------------------------------------------------------------------|------------------------------------------------------------------------------------------------|------------------------------------------|-----------------------------------|--------------------------------------------------|--------------|------|----------|---------------------------|-----------|
| 4-Hydroxybenzoic acid      | <chem>C1=CC(=CC=C1C(=O)O)O</chem>                                                           | 10 $\mu\text{M}$ <sup>8</sup>         | ROS stress survival                                                   | Induced with 250 $\mu\text{M}$ juglone                                                         | Improved                                 | n.d.                              | N2                                               | L1           | OP50 | S medium | Diluted in liquid         | 0.1% DMSO |
|                            |                                                                                             | 25 $\mu\text{M}$ <sup>9</sup>         | Lifespan elongation                                                   | Mean and maximum lifespan                                                                      | Improved                                 | n.d.                              | N2                                               | L4           | OP50 | NGM agar | Diluted into agar         | 0.1% DMSO |
|                            |                                                                                             | 12.5 $\mu\text{M}$ <sup>10</sup>      | Lifespan                                                              | Mean lifespan                                                                                  | No effect                                | n.d.                              | N2                                               | L1           | OP50 | NGM agar | Diluted in autoclaved NGM | 0.1% DMSO |
|                            |                                                                                             |                                       | Locomotion                                                            | Travel range/speed                                                                             | No effect                                |                                   |                                                  |              |      |          |                           |           |
|                            |                                                                                             |                                       | Pharyngeal pumping                                                    | Pumping rate                                                                                   | No effect                                |                                   |                                                  |              |      |          |                           |           |
|                            |                                                                                             |                                       | Autofluorescence                                                      | Microscopy and image processing (n.d. filter)                                                  | Improved                                 |                                   |                                                  |              |      |          |                           |           |
|                            |                                                                                             |                                       | Thermal stress survival                                               | Induced with 37°C                                                                              | Improved                                 |                                   |                                                  |              |      |          |                           |           |
|                            |                                                                                             |                                       | ROS stress survival                                                   | Induced with 1 mM juglone                                                                      | Improved                                 |                                   |                                                  |              |      |          |                           |           |
| Hypertonic stress survival | Induced with 500 mM NaCl                                                                    | Improved                              |                                                                       |                                                                                                |                                          |                                   |                                                  |              |      |          |                           |           |
| Antioxidative capacity     | Measurement of intracellular dichlorofluorescein fluorescence after incubation with juglone | Improved                              |                                                                       |                                                                                                |                                          |                                   |                                                  |              |      |          |                           |           |
| Vanillic acid              | <chem>COC1=C(C=CC(=C1)C(=O)O)O</chem>                                                       | 10 $\mu\text{M}$ <sup>8</sup>         | ROS stress survival                                                   | Induced with 250 $\mu\text{M}$ juglone                                                         | Improved                                 | n.d.                              | N2                                               | L1           | OP50 | S medium | Diluted in liquid         | 0.1% DMSO |
| 3,4-Dihydroxybenzaldehyde  | <chem>C1=CC(=C(C=C1C=O)O)O</chem>                                                           | 100 – 300 $\mu\text{M}$ <sup>11</sup> | Neurodegeneration                                                     | Paralysis assay with age-dependent TDP-43 toxicity of GABAergic neurons                        | Improved                                 | n.d.                              | Trangene worm with genotype unc-47p::TDP-43A315T | L4           | OP50 | NGM agar | Added directly to the NGM | 0% DMSO   |
|                            |                                                                                             |                                       | Neurodegeneration monitored by GFP tagged unc-47 in GABAergic neurons | Improved                                                                                       | Trangene worm with genotype unc-47p::GFP |                                   |                                                  |              |      |          |                           |           |
| Syraldehyde                | <chem>COc1cc(cc(c1O)OC)C=O</chem>                                                           | 100 – 300 $\mu\text{M}$ <sup>11</sup> | Neurodegeneration                                                     | Paralysis assay with age-dependent TDP-43 toxicity of GABAergic neurons                        | Improved                                 | n.d.                              | Trangene worm with genotype unc-47p::TDP-43A315T | L4           | OP50 | NGM agar | Added directly to the NGM | 0% DMSO   |
|                            |                                                                                             |                                       | Neurodegeneration monitored by GFP tagged unc-47 in GABAergic neurons | Improved                                                                                       | Trangene worm with genotype unc-47p::GFP |                                   |                                                  |              |      |          |                           |           |
| Tyrosol                    | <chem>Oc1ccc(cc1)CCO</chem>                                                                 | 1 mM <sup>12</sup>                    | Lifespan                                                              | Mean lifespan                                                                                  | Improved                                 | hsp-70, hsp-12.6, hsp-16.2, gst-4 | NL5901                                           | A            | OP50 | S medium | Diluted in liquid         | 0.1% DMSO |
|                            |                                                                                             |                                       | Motility                                                              | Activity counts per 30 minutes using WMicrotracker                                             | Improved                                 |                                   | N2                                               |              |      |          |                           |           |
|                            |                                                                                             |                                       | ROS levels                                                            | Measurement of dichlorofluorescein fluorescence                                                | Improved                                 |                                   | NL5901                                           |              |      |          |                           |           |
|                            |                                                                                             |                                       | Proteotoxicity                                                        | Quantification of YFP tagged $\alpha$ -synuclein expression in muscles by microscopy and image | Improved                                 |                                   | NL5901                                           | L4           |      |          |                           |           |

|                             |                                            |                                                                    |                                                                                                           |                                                                                             |               |                         |       |      |          |                                |                                                  |           |
|-----------------------------|--------------------------------------------|--------------------------------------------------------------------|-----------------------------------------------------------------------------------------------------------|---------------------------------------------------------------------------------------------|---------------|-------------------------|-------|------|----------|--------------------------------|--------------------------------------------------|-----------|
|                             |                                            |                                                                    |                                                                                                           | processing                                                                                  |               |                         |       |      |          |                                | petri dishes                                     |           |
|                             |                                            |                                                                    | Neurodegeneration                                                                                         | Count of intact dopaminergic neurons which degenerate due to $\alpha$ -synuclein expression | Improved      |                         | UA44  |      |          |                                |                                                  |           |
|                             |                                            | 250 $\mu$ M <sup>13</sup>                                          | Lifespan                                                                                                  | Median, maximum and mean lifespan                                                           | Improved      | daf-2, daf-16 and hsf-1 | DH26  | L1   | OP50     | NGM agar                       | Diluted into agar before pouring to petri dishes | 0.1% EtOH |
|                             |                                            |                                                                    | Pharyngeal pumping                                                                                        | Pharyngeal pumps                                                                            | Improved      |                         |       | A    |          |                                |                                                  |           |
|                             |                                            |                                                                    | Thermal stress survival                                                                                   | Induced with 35 °C                                                                          | Improved      |                         |       | L1   |          |                                |                                                  |           |
|                             |                                            |                                                                    | ROS stress survival                                                                                       | Induced with 4 mM paraquat                                                                  | Improved      |                         | N2    |      |          |                                |                                                  |           |
|                             |                                            |                                                                    | Nuclear translocation                                                                                     | DAF-16::GFP                                                                                 | Improved      |                         | TJ356 |      |          |                                |                                                  |           |
|                             |                                            |                                                                    |                                                                                                           |                                                                                             |               |                         |       |      |          |                                |                                                  |           |
| <b>Hydroxytyrosol</b>       | C1=CC(=C(C=C1CCO)O)O                       | 10, 50, 100 $\mu$ g/ml $\pm$ 65, 324 and 649 $\mu$ M <sup>14</sup> | Locomotion                                                                                                | Number of body bends                                                                        | No effect     | daf-16                  | N2    | L1   | OP50     | NGM agar                       | Diluted into agar before pouring to petri dishes | 0% DMSO   |
|                             |                                            |                                                                    | Pharyngeal pumping                                                                                        | Pharyngeal pumps                                                                            | No effect     |                         |       |      |          |                                |                                                  |           |
|                             |                                            |                                                                    | Antioxidative capacity                                                                                    | Measurement of dichlorofluorescein fluorescence during incubation at 37 °C                  | Improved      |                         |       |      |          |                                |                                                  |           |
|                             |                                            |                                                                    | Thermal stress survival                                                                                   | Induced with 35 °C                                                                          | Improved      |                         |       |      |          |                                |                                                  |           |
|                             |                                            |                                                                    | Nuclear translocation                                                                                     | DAF-16::GFP                                                                                 | Improved      |                         |       |      |          |                                |                                                  |           |
|                             | 250 $\mu$ g/ml $\pm$ 1.62 mM <sup>15</sup> | Lifespan                                                           | Mean, median and maximum lifespan                                                                         | Improved                                                                                    | daf-16, skn-1 | N2                      | L4    | OP50 | NGM agar | Added to the bacteria and agar | 0% DMSO                                          |           |
|                             |                                            | Locomotion                                                         | Wave initiation rate, body wave number and activity index                                                 | No effect                                                                                   |               |                         |       |      |          |                                |                                                  |           |
|                             |                                            | Thermal stress survival                                            | Induced with 37 °C                                                                                        | Improved                                                                                    |               |                         |       |      |          |                                |                                                  |           |
|                             |                                            | Autofluorescence                                                   | Microscopy and image processing (545/610 nm filter)                                                       | Improved                                                                                    |               |                         |       |      |          |                                |                                                  |           |
|                             |                                            | Proteotoxicity                                                     | Quantification of YFP tagged $\alpha$ -synuclein expression in muscles by microscopy and image processing | Improved                                                                                    |               |                         |       |      |          |                                |                                                  | OW13      |
|                             |                                            | Neurodegeneration                                                  | 6-OHDA induced neurodegeneration monitored by GFP tagged dopamine transporter expression                  | Improved                                                                                    |               |                         |       |      |          |                                |                                                  | UA44      |
|                             | 250 $\mu$ g/ml $\pm$ 1.62 mM <sup>16</sup> | Locomotion                                                         | Wave initiation rate, body wave number and activity index of muscle $\alpha$ -synuclein expressing worms  | Improved                                                                                    | n.d.          | OW13                    | L4    | n.d. | n.d.     | n.d.                           | n.d.                                             |           |
|                             |                                            |                                                                    | Wave initiation rate, body wave number and activity index of worms treated with 10 $\mu$ M rotenone       | Improved                                                                                    |               |                         |       |      |          |                                |                                                  | N2        |
|                             |                                            | Thermal stress survival                                            | Induced with 37 °C                                                                                        | Improved                                                                                    |               |                         |       |      |          |                                |                                                  |           |
|                             |                                            | Proteotoxicity                                                     | Quantification of YFP tagged $\alpha$ -synuclein expression in muscles by microscopy and image processing | Improved                                                                                    |               | OW13                    |       |      |          |                                |                                                  |           |
| <b>Phenethylamine</b>       | C1=CC=C(C=C1)CCN                           | 25, 50 and 100 $\mu$ M <sup>9</sup>                                | Lifespan elongation                                                                                       | Mean and maximum lifespan                                                                   | Improved      | sir-2.1                 | N2    | L4   | OP50     | NGM agar                       | Diluted into agar                                | 0.1% DMSO |
| <b>Tyramine</b>             | C1=CC(=CC=C1CCN)O                          | 50 $\mu$ M <sup>9</sup>                                            | Lifespan elongation                                                                                       | Mean and maximum lifespan                                                                   | Improved      | n.d.                    | N2    | L4   | OP50     | NGM agar                       | Diluted into agar                                | 0.1% DMSO |
| <b>Tryptamine</b>           | C1=CC=C2C(=C1)C(=CN2)CCN                   | 50 $\mu$ M <sup>9</sup>                                            | Lifespan elongation                                                                                       | Mean and maximum lifespan                                                                   | Improved      | n.d.                    | N2    | L4   | OP50     | NGM agar                       | Diluted into agar                                | 0.1% DMSO |
| <b>N-Phenethylacetamide</b> | CC(=O)NCCC1=CC=CC=C1                       | 25, 50 and 100 $\mu$ M <sup>9</sup>                                | Lifespan elongation                                                                                       | Mean and maximum lifespan                                                                   | Improved      | sir-2.1                 | N2    | L4   | OP50     | NGM agar                       | Diluted into agar                                | 0.1% DMSO |

|                               |                                                                  |                               |                         |                                                                                                           |           |              |       |       |      |            |                                          |                |
|-------------------------------|------------------------------------------------------------------|-------------------------------|-------------------------|-----------------------------------------------------------------------------------------------------------|-----------|--------------|-------|-------|------|------------|------------------------------------------|----------------|
| <b>N-Acetyltyramine</b>       | <chem>CC(=O)NCCC1=CC=C(C=C1)O</chem>                             | 50 $\mu\text{M}$ <sup>9</sup> | Lifespan elongation     | Mean and maximum lifespan                                                                                 | No effect | n.d.         | N2    | L4    | OP50 | NGM agar   | Diluted into agar                        | 0.1% DMSO      |
| <b>N-Acetyltryptamine</b>     | <chem>CC(=O)NCCC1=CN=C2=CC=CC=C21</chem>                         | 50 $\mu\text{M}$ <sup>9</sup> | Lifespan elongation     | Mean and maximum lifespan                                                                                 | No effect | n.d.         | N2    | L4    | OP50 | NGM agar   | Diluted into agar                        | 0.1% DMSO      |
| <b>3-Butylideneephthalide</b> | <chem>CCC/C=C\1/C2=CC=CC=C2C(=O)O1</chem>                        | 2 and 5 mM <sup>17</sup>      | Lifespan elongation     | Mean lifespan of animals treated with 6-OHDA                                                              | Improved  | rpn-6, egl-1 | N2    | Adult | OP50 | NGM agar   | n.d.                                     | 1% DMSO        |
|                               |                                                                  |                               | Proteotoxicity          | Quantification of YFP tagged $\alpha$ -synuclein expression in muscles by microscopy and image processing | Improved  |              | OW13  | L3    |      |            |                                          |                |
| <b>Floridoside</b>            | <chem>C([C@@H]1[C@@H]([C@@H]([C@@H]([C@@H]1)OC(CO)O)O)O)O</chem> | n.d. <sup>18</sup>            | ROS stress survival     | Induced with 300 $\mu\text{M}$ juglone                                                                    | Improved  | n.d.         | N2    | L1    | OP50 | NGM agar   | Added to the NGM before OP50 were spread | 0.05–0.1% MeOH |
| <b>Isothionic acid</b>        | <chem>O=S(=O)(O)CCO</chem>                                       | n.d. <sup>18</sup>            | ROS stress survival     | Induced with 300 $\mu\text{M}$ juglone                                                                    | Improved  | n.d.         | N2    | L1    | OP50 | NGM agar   | Added to the NGM before OP50 were spread | 0.05–0.1% MeOH |
| <b>Hydroxycitric acid</b>     | <chem>C(C(=O)O)C(C(=O)O)C(=O)O</chem>                            | 2 mM <sup>3</sup>             | Lifespan                | Mean and median lifespan                                                                                  | Improved  | daf-16       | N2    | L4    | OP50 | Liquid NGM | Diluted in liquid                        | 0% DMSO        |
|                               |                                                                  |                               | Locomotion              | Motility classes                                                                                          | Improved  |              |       |       |      |            |                                          |                |
|                               |                                                                  |                               | Thermal stress survival | Induced with 35 °C                                                                                        | No effect |              |       |       |      |            |                                          |                |
|                               |                                                                  |                               | ROS levels              | Measurement of dichlorofluorescein fluorescence                                                           | No effect |              |       |       |      |            |                                          |                |
|                               |                                                                  |                               | Nuclear translocation   | DAF-16::GFP                                                                                               | Improved  |              |       |       |      |            |                                          |                |
|                               |                                                                  |                               |                         |                                                                                                           |           | TJ356        |       |       |      |            |                                          |                |
|                               |                                                                  |                               |                         |                                                                                                           |           |              | LD001 |       |      |            |                                          |                |
| <b>Isocitric acid</b>         | <chem>C(C(C(C(=O)O)O)C(=O)O)C(=O)O</chem>                        | 2 mM <sup>3</sup>             | Lifespan                | Mean and median lifespan                                                                                  | No effect | n.d.         | N2    | L4    | OP50 | Liquid NGM | Diluted in liquid                        | 0% DMSO        |
|                               |                                                                  |                               | Locomotion              | Motility classes                                                                                          | No effect |              |       |       |      |            |                                          |                |
|                               |                                                                  |                               | Thermal stress survival | Induced with 35 °C                                                                                        | No effect |              |       |       |      |            |                                          |                |
|                               |                                                                  |                               | ROS levels              | Measurement of dichlorofluorescein fluorescence                                                           | No effect |              |       |       |      |            |                                          |                |
|                               |                                                                  |                               | Nuclear translocation   | DAF-16::GFP                                                                                               | No effect |              |       |       |      |            |                                          |                |
|                               |                                                                  |                               |                         |                                                                                                           |           | TJ356        |       |       |      |            |                                          |                |
|                               |                                                                  |                               |                         |                                                                                                           |           |              | LD001 |       |      |            |                                          |                |
| <b>2,3-Pentanediol</b>        | <chem>CCC(C(C)O)O</chem>                                         | 0.01%, 0.1%, 1% <sup>19</sup> | Lifespan                | Maximum, minimum and mean lifespan                                                                        | Improved  | n.d.,        | N2    | L1    | OP50 | NGM agar   | n.d.                                     | 0% DMSO        |
|                               |                                                                  |                               | Pharyngeal pumping      | Pumping rate                                                                                              | No effect |              |       |       |      |            |                                          |                |
|                               |                                                                  |                               | Thermal stress survival | Induced with 37 °C                                                                                        | Improved  |              |       |       |      |            |                                          |                |
|                               |                                                                  |                               | ROS stress survival     | Induced with 10 mM paraquat                                                                               | Improved  |              |       |       |      |            |                                          |                |
|                               |                                                                  |                               | ROS levels              | Measurement of dichlorofluorescein fluorescence                                                           | Improved  |              |       |       |      |            |                                          |                |
| <b>1,5-Pentanediol</b>        | <chem>C(CCO)CCO</chem>                                           | 0.01%, 0.1%, 1% <sup>19</sup> | Lifespan                | Maximum, minimum and mean lifespan                                                                        | Improved  | n.d.,        | N2    | L1    | OP50 | NGM agar   | n.d.                                     | 0% DMSO        |
|                               |                                                                  |                               | Pharyngeal pumping      | Pumping rate                                                                                              | No effect |              |       |       |      |            |                                          |                |
|                               |                                                                  |                               | Thermal stress survival | Induced with 37 °C                                                                                        | Improved  |              |       |       |      |            |                                          |                |
|                               |                                                                  |                               | ROS stress survival     | Induced with 10 mM paraquat                                                                               | Improved  |              |       |       |      |            |                                          |                |
|                               |                                                                  |                               | ROS levels              | Measurement of dichlorofluorescein fluorescence                                                           | No effect |              |       |       |      |            |                                          |                |

Table SI 3. Fatty acids

| Compound          | Structure (Smiles)                     | Dose [Ref]           | Experiment | Parameters                | Effect      | Involved Genes | Strain | Treat. Start | Food | Media    | Treatment application | Vector          |
|-------------------|----------------------------------------|----------------------|------------|---------------------------|-------------|----------------|--------|--------------|------|----------|-----------------------|-----------------|
| Oleic acid        | <chem>CCCCCCC/C=C/CCCCC(O)=O</chem>    | n.d. <sup>20</sup>   | Lifespan   | Logrank and mean lifespan | Detrimental | n.d.           | N2     | n.d.         | n.d. | NGM agar | n.d.                  | n.d.            |
|                   |                                        | 600 μM <sup>21</sup> | Lifespan   | Logrank                   | No effect   | n.d.           | N2     | A            | n.d. | NGM agar | n.d.                  | 0.1% NP-40      |
|                   |                                        | 0.8 mM <sup>22</sup> | Lifespan   | Logrank and mean lifespan | Improved    | n.d.           | N2     | L1           | OP50 | S medium | Added to agar         | 0.001% Tergitol |
| Palmitoleic acid  | <chem>O=C(O)CCCCC/C=C/CCCC</chem>      | 0.8 mM <sup>22</sup> | Lifespan   | Logrank and mean lifespan | Improved    | n.d.           | N2     | L1           | OP50 | S medium | Added to agar         | 0.001% Tergitol |
| Cis-vaccenic acid | <chem>CCCCC/C=C\CCCCC(O)=O</chem>      | 0.8 mM <sup>22</sup> | Lifespan   | Logrank and mean lifespan | Improved    | n.d.           | N2     | L1           | OP50 | S medium | Added to agar         | 0.001% Tergitol |
| Linoleic acid     | <chem>CCCC/C=C/C/C=C\CCCCC(O)=O</chem> | 0.8 mM <sup>22</sup> | Lifespan   | Logrank and mean lifespan | No effect   | n.d.           | N2     | L1           | OP50 | S medium | Added to agar         | 0.001% Tergitol |
| α-Linolenic acid  | <chem>CC/C=C/C/C=C\CCCCC(O)=O</chem>   | 0.8 mM <sup>22</sup> | Lifespan   | Logrank and mean lifespan | Detrimental | n.d.           | N2     | L1           | OP50 | S medium | Added to agar         | 0.001% Tergitol |

Table SI 4. Hydroxycinnamates

| Compound                          | Structure (Smiles)                                                                             | Dose [Ref]                                                                                        | Experiment          | Parameters                                                                       | Effect   | Involved Genes | Strain | Treat. Start | Food                                         | Media     | Treatment application | Vector   |                   |                            |
|-----------------------------------|------------------------------------------------------------------------------------------------|---------------------------------------------------------------------------------------------------|---------------------|----------------------------------------------------------------------------------|----------|----------------|--------|--------------|----------------------------------------------|-----------|-----------------------|----------|-------------------|----------------------------|
| 4-Coumaric acid                   | <chem>C1=CC(=CC=C1/C=C/O)O</chem>                                                              | 40, 80, and 200 μM <sup>23</sup>                                                                  | Proteotoxicity      | Paralysis assay with temperature-dependent amyloid beta expression in muscleless | Improved | n.d.           | CL4176 | L1           | n.d.                                         | NGM agar  | Added to the NGM      | n.d.     |                   |                            |
| 3-Coumaric acid                   | <chem>C1=CC(=CC=C1O)/C=C/C(=O)O</chem>                                                         | 40, 80, and 200 μM <sup>23</sup>                                                                  | Proteotoxicity      | Paralysis assay with temperature-dependent amyloid beta expression in muscleless | Improved | n.d.           | CL4176 | L1           | n.d.                                         | NGM agar  | Added to the NGM      | n.d.     |                   |                            |
| 2-Coumaric acid                   | <chem>C1=CC=C(C=C1)/C=C/C(=O)O</chem>                                                          | 40, 80, and 200 μM <sup>23</sup>                                                                  | Proteotoxicity      | Paralysis assay with temperature-dependent amyloid beta expression in muscleless | Improved | n.d.           | CL4176 | L1           | n.d.                                         | NGM agar  | Added to the NGM      | n.d.     |                   |                            |
| Caffeic acid                      | <chem>C1=CC(=C(C=C1)/C=C/C(=O)O)O</chem>                                                       | 40, 80, and 200 μM <sup>23</sup>                                                                  | Proteotoxicity      | Paralysis assay with temperature-dependent amyloid beta expression in muscleless | Improved | n.d.           | CL4176 | L1           | n.d.                                         | NGM agar  | Added to the NGM      | n.d.     |                   |                            |
| 2,4-Dihydroxycinnamic acid        | <chem>C1=CC(=C(C=C1O)O)/C=C/C(=O)O</chem>                                                      | 40, 80, and 200 μM <sup>23</sup>                                                                  | Proteotoxicity      | Paralysis assay with temperature-dependent amyloid beta expression in muscleless | Improved | n.d.           | CL4176 | L1           | n.d.                                         | NGM agar  | Added to the NGM      | n.d.     |                   |                            |
| 3,4,5-Trihydroxycinnamic acid     | <chem>C1=C(C=C(C=C1O)O)O)/C=C/C(=O)O</chem>                                                    | 40, 80, and 200 μM <sup>23</sup>                                                                  | Proteotoxicity      | Paralysis assay with temperature-dependent amyloid beta expression in muscleless | Improved | n.d.           | CL4176 | L1           | n.d.                                         | NGM agar  | Added to the NGM      | n.d.     |                   |                            |
| Chlorogenic acid                  | <chem>C1[C@H]([C@H]([C@H]([C@H]([C@H]([C@H]1C(=O)O)OC(=O)/C=C/C2=CC(=C(C=C2)O)O)O)O)O)O</chem> | 100 μM <sup>24</sup>                                                                              | Lifespan            | Mean and Median Lifespan                                                         | Improved | daf-16         | N2     | L4           | UV-inactivated OP50                          | NGM agar  | Pipetted onto NGM     | n.d.     |                   |                            |
|                                   |                                                                                                | 100 μg/ml ≅ 282.2 μM <sup>25</sup>                                                                | UV stress survival  | Induced with daily UV-C treatment (45 s/day)                                     | Improved | n.d.           | N2     | A            | OP50                                         | NGM agar  | n.d.                  | 0% DMSO  |                   |                            |
|                                   |                                                                                                | 200 μg/ml ≅ 564.4 μM <sup>26</sup>                                                                | Lifespan            | Mean and maximum lifespan                                                        | Improved | n.d.           | N2     | A            | OP50                                         | NGM agar  | n.d.                  | 0% DMSO  |                   |                            |
|                                   |                                                                                                |                                                                                                   | ROS stress survival | Induced 10 mM paraquat                                                           | Improved |                |        |              |                                              |           |                       |          |                   |                            |
|                                   |                                                                                                | 54 μg/ml ≅ 152 μM <sup>27</sup>                                                                   | Lifespan            | Mean lifespan                                                                    | Improved | n.d.           | N2     | A            | OP50                                         | S medium  | Diluted in liquid     | NGM agar | Pipetted onto NGM | n.d. concentration of DMSO |
|                                   |                                                                                                |                                                                                                   | Proteotoxicity      | Paralysis assay with temperature-dependent amyloid beta expression in muscleless | Improved |                | CL4176 | n.d.         |                                              |           |                       |          |                   |                            |
| 400 μg/ml ≅ 1.13 mM <sup>28</sup> | Proteotoxicity                                                                                 | Quantification of YFP tagged α-synuclein expression in muscles by microscopy and image processing | No effect           | n.d.                                                                             | OW13     | L4             | OP50   | NGM agar     | Spread on top of NGM plates seeded with OP50 | 0.1% DMSO |                       |          |                   |                            |

|                                  |                                                                                                 |                                          |                            |                                                                               |           |      |    |        |      |          |                           |                            |                   |
|----------------------------------|-------------------------------------------------------------------------------------------------|------------------------------------------|----------------------------|-------------------------------------------------------------------------------|-----------|------|----|--------|------|----------|---------------------------|----------------------------|-------------------|
|                                  |                                                                                                 | 80 µg/ml $\pm$<br>110.1 µM <sup>29</sup> | Lifespan                   | Median and maximum lifespan                                                   | No effect | n.d. | N2 | L4     | OP50 | NGM agar | Added to the NGM          | 0% DMSO                    |                   |
|                                  |                                                                                                 |                                          |                            |                                                                               | No effect |      |    | CL4176 |      |          |                           |                            |                   |
|                                  |                                                                                                 |                                          | Proteotoxicity             | Paralysis assay with temperature-dependent amyloid beta expression in muscles | No effect |      |    |        |      |          |                           |                            | L1                |
| <b>1,5-Dicaffeoylquinic acid</b> | C1[C@H]([C@@H]([C@@H]([C@@H]1(C(=O)O)OC(=O)C=CC2=CC(=C(C=C2)O)O)OC(=O)C=CC3=CC(=C(C=C3)O)O)O)O  | 15 µg/ml $\pm$<br>29 µM <sup>27</sup>    | Lifespan                   | Mean lifespan                                                                 | Improved  | n.d. | N2 | A      | OP50 | S medium | Diluted in liquid         | n.d. concentration of DMSO |                   |
|                                  |                                                                                                 |                                          | Proteotoxicity             | Paralysis assay with temperature-dependent amyloid beta expression in muscles | Improved  |      |    | CL4176 |      | n.d.     | NGM agar                  |                            | Pipetted onto NGM |
| <b>Cynarine</b>                  | C1[C@H]([C@H]([C@@H]([C@@H]1(C(=O)O)OC(=O)C=C/C2=CC(=C(C=C2)O)O)OC(=O)C=C/C3=CC(=C(C=C3)O)O)O)O | 7.5 µg/ml $\pm$<br>14.5 µM <sup>27</sup> | Lifespan                   | Mean lifespan                                                                 | Improved  | n.d. | N2 | A      | OP50 | S medium | Diluted in liquid         | n.d. concentration of DMSO |                   |
|                                  |                                                                                                 |                                          | Proteotoxicity             | Paralysis assay with temperature-dependent amyloid beta expression in muscles | Improved  |      |    | CL4176 |      | n.d.     | NGM agar                  |                            | Pipetted onto NGM |
| <b>6-Gingerol</b>                | CCCC[C@H](C(C=O)CCC1=CC(=C(C=C1)O)OC)O                                                          | 12.5 and 25 µM <sup>10</sup>             | Lifespan                   | Mean lifespan                                                                 | Improved  | n.d. | N2 | L1     | OP50 | NGM agar | Diluted in autoclaved NGM | 0.1% DMSO                  |                   |
|                                  |                                                                                                 |                                          | Locomotion                 | Travel range/speed                                                            | No effect |      |    |        |      |          |                           |                            |                   |
|                                  |                                                                                                 |                                          | Pharyngeal pumping         | Pumping rate                                                                  | No effect |      |    |        |      |          |                           |                            |                   |
|                                  |                                                                                                 |                                          | Autofluorescence           | Microscopy and image processing (n.d. filter)                                 | Improved  |      |    |        |      |          |                           |                            |                   |
|                                  |                                                                                                 |                                          | Thermal stress survival    | Induced with 37°C                                                             | Improved  |      |    |        |      |          |                           |                            |                   |
|                                  |                                                                                                 |                                          | ROS stress survival        | Induced with 1 mM juglone                                                     | Improved  |      |    |        |      |          |                           |                            |                   |
|                                  |                                                                                                 |                                          | Hypertonic stress survival | Induced with 500 mM NaCl                                                      | Improved  |      |    |        |      |          |                           |                            |                   |
| Antioxidative capacity           | Measurement of intracellular dichlorofluorescein fluorescence after incubation with juglone     | Improved                                 |                            |                                                                               |           |      |    |        |      |          |                           |                            |                   |
| <b>Kavain</b>                    | COC1=CC(=O)OC(C1)/C=C/C2=CC=C=C2                                                                | 40 and 80 µM [13]                        | Lifespan elongation        | Mean lifespan under high-glucose concentration                                | Improved  | n.d. | N2 | L4     | OP50 | NGM agar | n.d.                      | n.d.                       |                   |

Table SI 5. Gallates, tannins and derived metabolites

| Compound                 | Structure (Smiles)                                                                             | Dose [Ref]                                      | Experiment                      | Parameters                                                                 | Effect                    | Involved Genes   | Strain                                           | Treat. Start | Food | Media                      | Treatment application     | Vector    |
|--------------------------|------------------------------------------------------------------------------------------------|-------------------------------------------------|---------------------------------|----------------------------------------------------------------------------|---------------------------|------------------|--------------------------------------------------|--------------|------|----------------------------|---------------------------|-----------|
| Catechol                 | <chem>C1=CC=C(C(=C1)O)O</chem>                                                                 | 100 – 300 $\mu$ M [11]                          | Neurodegeneration               | Paralysis assay with age-dependent TDP-43 toxicity of GABAergic neurons    | Improved                  | n.d.             | Trangene worm with genotype unc-47p::TDP-43A315T | L4           | OP50 | NGM agar                   | Added to the NGM          | 0% DMSO   |
|                          |                                                                                                |                                                 |                                 | Neurodegeneration monitored by GFP tagged unc-47 in GABAergic neurons      | Improved                  |                  |                                                  |              |      |                            |                           |           |
| Gallic acid              | <chem>C1=C(C=C(C(=C1O)O)C(=O)O</chem>                                                          | 100 – 300 $\mu$ M <sup>11</sup>                 | Neurodegeneration               | Paralysis assay with age-dependent TDP-43 toxicity of GABAergic neurons    | Improved                  | n.d.             | Trangene worm with genotype unc-47p::TDP-43A315T | L4           | OP50 | NGM agar                   | Added to the NGM          | n.d.      |
|                          |                                                                                                |                                                 |                                 | Neurodegeneration monitored by GFP tagged unc-47 in GABAergic neurons      | Improved                  |                  |                                                  |              |      |                            |                           |           |
| Catechin                 | <chem>C1[C@@H]([C@H](OC2=CC(=CC(=C21)O)O)C3=CC(=C(C=C3)O)O)O</chem>                            | 200 $\mu$ M <sup>30</sup>                       | Lifespan elongation             | Median and maximal lifespan                                                | Improved                  | bec-1 and pink-1 | N2                                               | L1           | OP50 | NGM agar                   | Diluted in OP50 stock     | n.d.      |
|                          |                                                                                                |                                                 | Locomotion                      | Number of body bends                                                       | Improved                  |                  |                                                  |              |      |                            |                           |           |
|                          |                                                                                                |                                                 |                                 | Speed                                                                      | Improved                  |                  |                                                  |              |      |                            |                           |           |
|                          |                                                                                                | 10 $\mu$ M <sup>8</sup>                         | ROS stress survival             | Induced with 250 $\mu$ M juglone                                           | Improved                  | n.d.             | N2                                               | L1           | OP50 | S medium                   | Diluted in liquid         | 0.1% DMSO |
| Epicatechin              | <chem>C1[C@H]([C@H](OC2=CC(=CC(=C21)O)O)C3=CC(=C(C=C3)O)O)O</chem>                             | 100 $\mu$ M [20]                                | Thermal/osmotic stress survival | Induced with 37 °C and 10 mM glucose                                       | No effect                 | n.d.             | N2                                               | Adult        | OP50 | M9 buffer with 1% Tween-20 | Diluted in liquid         | 0% DMSO   |
| Epicatechin gallate      | <chem>C1[C@H]([C@H](OC2=CC(=CC(=C21)O)O)C3=CC(=C(C=C3)O)OC(=O)C4=CC(=C(C(=C4)O)O)O)O</chem>    | 100 $\mu$ M <sup>31</sup>                       | Thermal/osmotic stress survival | Induced with 37 °C and 10 mM glucose                                       | No effect                 | n.d.             | N2                                               | Adult        | OP50 | M9 buffer with 1% Tween-20 | Diluted in liquid         | 0% DMSO   |
| Epigallocatechin         | <chem>C1[C@H]([C@H](OC2=CC(=CC(=C21)O)O)C3=CC(=C(C(=C3)O)O)O)O</chem>                          | 100 $\mu$ M <sup>31</sup>                       | Thermal/osmotic stress survival | Induced with 37 °C and 10 mM glucose                                       | No effect                 | n.d.             | N2                                               | Adult        | OP50 | M9 buffer with 1% Tween-20 | Diluted in liquid         | 0% DMSO   |
| Epigallocatechin gallate | <chem>C1[C@H]([C@H](OC2=CC(=CC(=C21)O)O)C3=CC(=C(C(=C3)O)O)OC(=O)C4=CC(=C(C(=C4)O)O)O)O</chem> | 50 $\mu$ g/ml $\cong$ 109 $\mu$ M <sup>14</sup> | Locomotion                      | Number of body bends                                                       | No effect                 | n.d.             | N2                                               | L1           | OP50 | NGM agar                   | Diluted in autoclaved NGM | 0% DMSO   |
|                          |                                                                                                |                                                 | Pharyngeal pumping              | Pumping rate                                                               | No effect                 |                  |                                                  |              |      |                            |                           |           |
|                          |                                                                                                |                                                 | Antioxidative capacity          | Measurement of dichlorofluorescein fluorescence during incubation at 37 °C | Improved                  |                  |                                                  |              |      |                            |                           |           |
|                          |                                                                                                |                                                 | Thermal stress survival         | Induced with 35 °C                                                         | Improved                  |                  |                                                  |              |      |                            |                           |           |
|                          |                                                                                                |                                                 |                                 |                                                                            | 100 $\mu$ M <sup>31</sup> |                  |                                                  |              |      |                            |                           |           |

|                     |                                                                 |                                                                           |                                |                                                                              |                                                       |               |              |      |      |                  |                        |            |           |
|---------------------|-----------------------------------------------------------------|---------------------------------------------------------------------------|--------------------------------|------------------------------------------------------------------------------|-------------------------------------------------------|---------------|--------------|------|------|------------------|------------------------|------------|-----------|
|                     |                                                                 |                                                                           | stress survival                |                                                                              |                                                       |               |              |      |      | with 1% Tween-20 |                        |            |           |
|                     |                                                                 | 25 and 50 $\mu\text{g/ml} \cong 54.5$ and 109 $\mu\text{M}$ <sup>32</sup> | Lifespan                       | Mean and median lifespan                                                     | Improved                                              | skn-1, daf-16 | N2           | A    | OP50 | S medium         | Diluted in liquid      | 0% DMSO    |           |
|                     |                                                                 |                                                                           | ROS stress survival            | Induced with 80 $\mu\text{M}$ juglone                                        | Improved                                              |               |              | L1   |      |                  |                        |            |           |
|                     |                                                                 |                                                                           | ROS levels                     | Measurement of dichlorofluorescein fluorescence                              | Improved                                              |               |              |      |      |                  |                        |            |           |
|                     |                                                                 |                                                                           | Nuclear translocation          | DAF-16::GFP<br>SKN-1::GFP                                                    | Improved<br>No effect                                 |               | TJ356<br>LD1 |      |      |                  |                        |            |           |
|                     |                                                                 | 25 $\mu\text{g/ml} \cong 54.5$ $\mu\text{M}$ <sup>33</sup>                | Pharyngeal pumping             | Pumping rate                                                                 | Improved                                              | daf-16        | N2           | L4   | OP50 | NGM agar         | Diluted in OP50 stock  | 1% DMSO    |           |
|                     |                                                                 |                                                                           | Autofluorescence               | Microscopy and image processing (360-370/460 nmfilter)                       | Improved                                              |               |              | BA17 |      |                  |                        |            |           |
|                     |                                                                 |                                                                           | ROS stress survival            | Induced with 80 $\mu\text{M}$ juglone                                        | Improved                                              |               | N2           | L1   |      |                  |                        |            |           |
|                     |                                                                 |                                                                           | ROS levels                     | Measurment of dichlorofluorescein fluorescence                               | Improved                                              |               |              |      |      |                  |                        |            |           |
|                     |                                                                 |                                                                           | Nuclear translocation          | DAF-16::GFP<br>SKN-1::GFP                                                    | Improved<br>No effect                                 |               |              |      |      | TJ356<br>LD1     |                        |            |           |
|                     |                                                                 | 25 $\mu\text{g/ml} \cong 54.5$ $\mu\text{M}$ <sup>34</sup>                | Pharyngeal pumping             | Pumping rate                                                                 | Improved                                              | daf-16        | N2           | L4   | OP50 | NGM agar         | Added to the OP50 lawn | 1% DMSO    |           |
|                     |                                                                 |                                                                           | Autofluorescence               | Microscopy and image processing (360/ 460 nm filter)                         | Improved                                              |               |              | L1   |      |                  |                        |            |           |
|                     |                                                                 |                                                                           | ROS stress survival            | Induced with 80 $\mu\text{M}$ juglone                                        | Improved                                              |               | N2           | L1   |      |                  |                        |            |           |
|                     |                                                                 |                                                                           | ROS levels                     | Measurement of dichlorofluorescein fluorescence                              | Improved                                              |               |              |      |      |                  |                        |            |           |
|                     |                                                                 |                                                                           | Nuclear translocation          | DAF-16::GFP<br>SKN-1::GFP                                                    | Improved<br>No effect                                 |               |              |      |      | TJ356<br>LD1     |                        |            |           |
|                     |                                                                 | 25, 50 and 100 $\mu\text{g/mL}$ <sup>35</sup>                             | ROS stress survival            | Induced with 80 $\mu\text{M}$ juglone                                        | Improved                                              | daf-16        | N2           | L1   | OP50 | S medium         | Diluted in liquid      | 0% DMSO    |           |
|                     |                                                                 |                                                                           | Antioxidative capacity         | Measurement of dichlorofluorescein fluorescence after treatment with juglone | Improved                                              |               |              |      |      |                  |                        |            |           |
|                     |                                                                 |                                                                           | Nuclear translocation          | DAF-16::GFP                                                                  | Improved                                              |               | TJ356        |      |      |                  |                        |            |           |
|                     |                                                                 | 50 $\mu\text{g/ml} \cong 109$ $\mu\text{M}$ <sup>36</sup>                 | ROS stress survival            | Induced with 80 $\mu\text{M}$ juglone                                        | Improved                                              | daf-16        | N2           | L1   | OP50 | S medium         | Diluted in liquid      | 0% DMSO    |           |
|                     |                                                                 |                                                                           | ROS levels                     | Measurment of dichlorofluorescein fluorescence                               | Improved                                              |               |              |      |      |                  |                        |            |           |
|                     |                                                                 |                                                                           | Nuclear translocation          | DAF-16::GFP                                                                  | Improved                                              |               | TJ356        |      |      |                  |                        |            |           |
|                     |                                                                 | 50 $\mu\text{g/ml} \cong 109$ $\mu\text{M}$ <sup>37</sup>                 | ROS stress survival            | Induced with 80 $\mu\text{M}$ juglone                                        | Improved                                              | daf-16        | N2           | L1   | OP50 | S medium         | Diluted in liquid      | 0% DMSO    |           |
|                     |                                                                 |                                                                           | Antioxidative capacity         | Measurement of dichlorofluorescein fluorescence after treatment with juglone | Improved                                              |               |              |      |      |                  |                        |            |           |
|                     |                                                                 |                                                                           | Nuclear translocation          | DAF-16::GFP                                                                  | Improved                                              |               | TJ356        |      |      |                  |                        |            |           |
|                     |                                                                 | 50 $\mu\text{g/ml} \cong 109$ $\mu\text{M}$ <sup>38</sup>                 | ROS stress survival            | Induced with 80 $\mu\text{M}$ juglone                                        | Improved                                              | n.d.          | N2           | L1   | OP50 | NGM agar         | n.d.                   | 2.1% MeOH  |           |
|                     |                                                                 |                                                                           | ROS levels                     | Measurement of dichlorofluorescein fluorescence                              | Improved                                              |               |              |      |      |                  |                        |            |           |
| <b>Ellagic acid</b> | <chem>C1=C2C3=C(C(=C1O)O)OC(=O)C4=CC(=C(C(=C43)OC2=O)O)O</chem> | 1, 2, 5, 10, 25, and 50 $\mu\text{M}$ <sup>39</sup>                       | Lifespan                       | Mean lifespan                                                                | No effect                                             | n.d.          | N2           | L4   | OP50 | S medium         | Diluted in liquid      | 0.05% DMSO |           |
|                     |                                                                 |                                                                           | 50 $\mu\text{M}$ <sup>40</sup> | Lifespan                                                                     | Mean lifespan                                         |               |              |      |      |                  |                        |            | No effect |
|                     |                                                                 |                                                                           |                                | Locomotion                                                                   | Measured with Worm Tracker (Arbitrary mobility units) |               |              |      |      |                  |                        |            | No effect |
|                     |                                                                 |                                                                           | Pharyngeal Pumping             | Pumping rate                                                                 | Improved                                              |               |              |      |      |                  |                        |            |           |



|                             |                                                                                                                                                                           |                                                     |                                              |                                                       |               |                                          |                                                |    |      |          |                           |                           |
|-----------------------------|---------------------------------------------------------------------------------------------------------------------------------------------------------------------------|-----------------------------------------------------|----------------------------------------------|-------------------------------------------------------|---------------|------------------------------------------|------------------------------------------------|----|------|----------|---------------------------|---------------------------|
| <b>Urolithin A</b>          | <chem>C1=CC=C(C=C1O)C(=O)OC3=C2C=C(C=C3)O</chem>                                                                                                                          | 1, 2, 5, 10, 25, and 50 $\mu\text{M}$ <sup>39</sup> | Lifespan                                     | Mean lifespan                                         | No effect     | n.d.                                     | N2                                             | L4 | OP50 | S medium | Diluted in liquid         | 0.05% DMSO                |
|                             |                                                                                                                                                                           |                                                     | (10, 20 and 50 $\mu\text{M}$ ) <sup>40</sup> | Lifespan                                              | Mean lifespan | Improved                                 | bec-1, pdr-1, sqst-1, skn-1, vps-34 and pink-1 | N2 | L1   | OP50     | NGM agar                  | Diluted in autoclaved NGM |
|                             |                                                                                                                                                                           | Mean lifespan                                       |                                              |                                                       | Improved      |                                          |                                                |    |      |          |                           |                           |
|                             |                                                                                                                                                                           | Locomotion                                          |                                              | Measured with Worm Tracker (Arbitrary mobility units) | Improved      | SI4103                                   |                                                |    |      |          |                           |                           |
|                             |                                                                                                                                                                           |                                                     |                                              | Muscle fiber organization                             | Improved      |                                          |                                                |    |      |          |                           |                           |
|                             |                                                                                                                                                                           | Pharyngeal Pumping                                  | Pumping rate                                 | Improved                                              | N2            |                                          |                                                |    |      |          |                           |                           |
| ROS stress survival         | Induced with 4 mM paraquat                                                                                                                                                | Improved                                            |                                              |                                                       |               |                                          |                                                |    |      |          |                           |                           |
| <b>Urolithin B</b>          | <chem>C1=CC=C2C(=C1)C3=C(C=C(C=C3)O)OC2=O</chem>                                                                                                                          | 50 $\mu\text{M}$ <sup>40</sup>                      | Lifespan                                     | Mean lifespan                                         | Improved      | n.d.                                     | N2                                             | L1 | OP50 | NGM agar | Diluted in autoclaved NGM | 1% DMSO                   |
|                             |                                                                                                                                                                           |                                                     | Locomotion                                   | Measured with Worm Tracker (Arbitrary mobility units) | Improved      |                                          |                                                |    |      |          |                           |                           |
|                             |                                                                                                                                                                           |                                                     | Pharyngeal Pumping                           | Pumping rate                                          | Improved      |                                          |                                                |    |      |          |                           |                           |
| <b>Urolithin C</b>          | <chem>C1=CC=C(C=C1O)OC(=O)C3=CC(=C(C=C23)O)O</chem>                                                                                                                       | 50 $\mu\text{M}$ <sup>40</sup>                      | Lifespan                                     | Mean lifespan                                         | Improved      | n.d.                                     | N2                                             | L1 | OP50 | NGM agar | Diluted in autoclaved NGM | 1% DMSO                   |
|                             |                                                                                                                                                                           |                                                     | Locomotion                                   | Measured with Worm Tracker (Arbitrary mobility units) | No effect     |                                          |                                                |    |      |          |                           |                           |
|                             |                                                                                                                                                                           |                                                     | Pharyngeal Pumping                           | Pumping rate                                          | Improved      |                                          |                                                |    |      |          |                           |                           |
| <b>Urolithin D</b>          | <chem>C1=CC(=C(C2=C1C3=CC(=C(C=C3)C(=O)O2)O)O)O</chem>                                                                                                                    | 50 $\mu\text{M}$ <sup>40</sup>                      | Lifespan                                     | Mean lifespan                                         | Improved      | n.d.                                     | N2                                             | L1 | OP50 | NGM agar | Diluted in autoclaved NGM | 1% DMSO                   |
|                             |                                                                                                                                                                           |                                                     | Locomotion                                   | Measured with Worm Tracker (Arbitrary mobility units) | No effect     |                                          |                                                |    |      |          |                           |                           |
|                             |                                                                                                                                                                           |                                                     | Pharyngeal Pumping                           | Pumping rate                                          | Improved      |                                          |                                                |    |      |          |                           |                           |
| <b>Pentagalloylglucoese</b> | <chem>C1=C(C=C(C=C1O)O)OC(=O)OC[C@@H]2[C@H]([C@@H]([C@H]([C@@H](O2)OC(=O)C3=CC(=C(C=C3)O)O)OC(=O)C4=CC(=C(C=C4)O)O)OC(=O)C5=CC(=C(C=C5)O)O)OC(=O)C6=CC(=C(C=C6)O)O</chem> | (40, 80, 120, 160 $\mu\text{M}$ ) <sup>41</sup>     | Lifespan elongation                          | median lifespan                                       | Improved      | daf-16, age-1, eat-2, sir-2.1, and isp-1 | N2                                             | L1 | OP50 | NGM agar | Diluted in OP50 stock     | 0.2% DMSO                 |
|                             |                                                                                                                                                                           |                                                     | Locomotion                                   | Number of body bends                                  | Not improved  |                                          |                                                |    |      |          |                           |                           |
|                             |                                                                                                                                                                           |                                                     | Pharyngeal Pumping                           | Pumping rate                                          | Not improved  |                                          |                                                |    |      |          |                           |                           |
|                             |                                                                                                                                                                           |                                                     | Autofluorescence                             | Plate reader (emission 430 nm)                        | Not improved  |                                          |                                                |    |      |          |                           |                           |
|                             |                                                                                                                                                                           |                                                     | ROS levels                                   | Measurement of dichlorofluorescein fluorescence       | Not improved  |                                          |                                                |    |      |          |                           |                           |
|                             |                                                                                                                                                                           |                                                     | Thermal stress survival                      | Induced with 35 °C                                    | Improved      |                                          |                                                |    |      |          |                           |                           |

Table SI 6. Diarylheptanoids

| Compound        | Structure (Smiles)                                                     | Dose [Ref]                                       | Experiment          | Parameters                                                                    | Effect   | Involved Genes                                                       | Strain | Treat. Start | Food | Media    | Treatment application | Vector    |
|-----------------|------------------------------------------------------------------------|--------------------------------------------------|---------------------|-------------------------------------------------------------------------------|----------|----------------------------------------------------------------------|--------|--------------|------|----------|-----------------------|-----------|
| <b>Curcumin</b> | <chem>COC1=C(C=CC(=C1)/C=C/C(=O)CC(=O)/C=C/C2=CC(=C(C=C2)O)OC)O</chem> | 10, 20, 100, and 200 $\mu\text{M}$ <sup>42</sup> | ROS stress survival | Induced with 250 $\mu\text{M}$ juglone                                        | Improved | age-1, akt-1, pdk-1, osr-1, unc-43, sek-1, skn-1, sir-2.1, and mev-1 | N2     | L1           | OP50 | S Medium | Diluted in liquid     | 0.1% DMSO |
|                 |                                                                        |                                                  | ROS levels          | Measurement of dichlorofluorescein fluorescence                               | Improved |                                                                      |        |              |      |          |                       |           |
|                 |                                                                        | 100 $\mu\text{M}$ <sup>43</sup>                  | Proteotoxicity      | Paralysis assay with temperature-dependent amyloid beta expression in muscles | Improved | n.d.                                                                 | CL4176 | L1           | OP50 | NGM agar | Diluted in OP50 stock | 0.1% DMSO |

Table SI 7. Flavonoids

| Compound               | Structure (Smiles)                                                                                     | Dose [Ref]                           | Experiment              | Parameters                                                                                                     | Effect    | Involved Genes | Strain | Treat. Start | Food                  | Media      | Treatment application      | Vector                        |       |
|------------------------|--------------------------------------------------------------------------------------------------------|--------------------------------------|-------------------------|----------------------------------------------------------------------------------------------------------------|-----------|----------------|--------|--------------|-----------------------|------------|----------------------------|-------------------------------|-------|
| Isoliquiritigenin      | <chem>C1=CC(=CC=C1/C=C/C(=O)C2=C(C=C(C=C2)O)O)O</chem>                                                 | 2 mM <sup>44</sup>                   | Lifespan                | T <sub>50</sub>                                                                                                | Improved  | n.d.           | NL5901 | A            | OP50                  | NGM agar   | n.d.                       | 4% DMSO                       |       |
|                        |                                                                                                        |                                      | Proteotoxicity          | Quantification of YFP tagged $\alpha$ -synuclein expression in muscles by microscopy and image processing      | No effect |                |        |              |                       |            |                            |                               |       |
| 4,4'-Dimethoxychalcone | <chem>COC1=CC=C(C=C1)/C=C/C(=O)C2=CC=C(C=C2)OC</chem>                                                  | 41.6 $\mu$ M <sup>45</sup>           | Lifespan                | Median lifespan                                                                                                | Improved  | atg-5          | N2     | L1           | UV-inactivated OP50   | NGM agar   | Added to the OP50 lawn     | n.d.                          |       |
| Aspalathin             | <chem>C1=CC(=C(C=C1CC(=O)C2=C(C=C(C(=C2O)[C@H]3[C@@H]([C@H]([C@@H]([C@H](O3)C(O)O)O)O)O)O)O)O)O</chem> | 10, 20 and 50 $\mu$ M [53]           | Lifespan                | Mean life span                                                                                                 | No effect | daf-16, sod-3  | N2     | A            | OP50                  | NGM agar   | Added to OP50              | n.d.                          |       |
|                        |                                                                                                        |                                      |                         | Mean life span under high glucose (50 mM) conditions                                                           | Improved  |                |        |              |                       |            |                            |                               |       |
|                        |                                                                                                        |                                      | ROS stress survival     | Induced with 400 $\mu$ M juglone                                                                               | Improved  |                |        | L1           |                       |            |                            |                               |       |
|                        |                                                                                                        |                                      | ROS levels              | Measurement of dichlorofluorescein fluorescence                                                                | Improved  |                |        |              |                       |            |                            |                               |       |
| Myricetin              | <chem>C1=C(C=C(C=C1O)O)O)C2=C(C(=O)C3=C(C=C(C3O2)O)O)O</chem>                                          | 100 $\mu$ M <sup>46</sup>            | Lifespan elongation     | Mean Lifespan                                                                                                  | Improved  | daf-16         | N2     | L4           | Heat-inactivated OP50 | Liquid NGM | Diluted in liquid          | 0.1% DMSO                     |       |
|                        |                                                                                                        |                                      | Autofluorescence        | Microscopy and image processing (360-370/420-460 nm filter)                                                    | Improved  |                |        |              |                       |            |                            |                               |       |
|                        |                                                                                                        |                                      | Antioxidative capacity  | Measurement of intracellular dichlorofluorescein fluorescence after incubation at 37 °C with spectrophotometer | No effect |                |        |              |                       |            |                            |                               |       |
|                        |                                                                                                        |                                      | Thermal stress survival | Induced with 37 °C                                                                                             | No effect |                |        |              |                       |            |                            |                               |       |
|                        |                                                                                                        | 100 $\mu$ M <sup>47g</sup>           | Lifespan                | Mean, median and maximal lifespan                                                                              | Improved  | daf-16         | N2     | L4           | Heat-inactivated OP50 | NGM agar   | Added to the OP50 lawn     | 0.2% Ethanol: Tween 80 (92:8) |       |
|                        |                                                                                                        |                                      | Nuclear translocation   | DAF-16::GFP                                                                                                    | Improved  |                |        |              |                       |            |                            |                               |       |
| Tangeretin             | <chem>COC1=CC=C(C=C1)C2=CC(=O)C3=C(C(O2)C(=C(C(=C3OC)O)C)OC)OC</chem>                                  | 30 and 100 $\mu$ M [60]              | Lifespan                | Mean, median and maximal lifespan                                                                              | Improved  | daf-16         | N2     | L4           | OP50                  | NGM agar   | Diluted in the OP50 stocks | n.d.                          |       |
|                        |                                                                                                        |                                      | Locomotion              | Number of body bends                                                                                           | Improved  |                |        |              |                       |            |                            |                               |       |
|                        |                                                                                                        |                                      |                         | Motility classes                                                                                               | Improved  |                |        |              |                       |            |                            |                               |       |
|                        |                                                                                                        |                                      | Pharyngeal pumping      | Pumping rate                                                                                                   | Improved  |                |        |              |                       |            |                            |                               |       |
|                        |                                                                                                        |                                      | ROS stress survival     | Induced with 8 mM H <sub>2</sub> O <sub>2</sub>                                                                | Improved  |                |        |              |                       |            |                            |                               |       |
|                        |                                                                                                        |                                      | Antioxidative capacity  | Measurement of dichlorofluorescein fluorescence after incubation with H <sub>2</sub> O <sub>2</sub>            | No effect |                |        |              |                       |            |                            |                               |       |
|                        |                                                                                                        |                                      | Thermal stress survival | Induced with 35 °C                                                                                             | Improved  |                |        |              |                       |            |                            |                               |       |
|                        |                                                                                                        |                                      | Nuclear translocation   | DAF-16::GFP                                                                                                    | Improved  |                |        |              |                       |            |                            |                               | MAH97 |
| Baicalein              | <chem>C1=CC=C(C=C1)C2=CC(=O)C3=C(C(O2)C=C(C(=C3O)O)O)O</chem>                                          | 25, 50 and 100 $\mu$ M <sup>48</sup> | Lifespan                | Median and maximum life span                                                                                   | Improved  | skn-1          | N2     | L4           | OP50                  | Liquid NGM | Diluted in liquid          | 0.1% DMSO                     |       |
|                        |                                                                                                        |                                      | Pharyngeal pumping      | Pumping rate                                                                                                   | No effect |                |        | L4           |                       |            |                            |                               |       |
|                        |                                                                                                        |                                      | ROS stress survival     | Induced with 5 mM sodium arsenite                                                                              | Improved  |                |        | N2           |                       |            |                            |                               | L4    |
|                        |                                                                                                        |                                      | Thermal stress survival | Induced with 37 °C                                                                                             | Improved  |                |        | N2           |                       |            |                            |                               | L4    |
|                        |                                                                                                        |                                      | Nuclear translocation   | DAF-16::GFP                                                                                                    | No effect |                |        | TJ356        |                       |            |                            |                               | L4    |
| Quercetin              | <chem>C1=CC(=C(C=C1)C2=C(C(=O)C3=C(C=C(C(=C3O2)O)O)O)O)O</chem>                                        | 100 $\mu$ M <sup>47g</sup>           | Lifespan                | Mean, median and maximal lifespan                                                                              | Improved  | daf-16         | N2     | L4           | Heat-inactivated OP50 | NGM agar   | Added to the OP50 lawn     | 0.2% Ethanol: Tween 80 (92:8) |       |
|                        |                                                                                                        |                                      | Nuclear translocation   | DAF-16::GFP                                                                                                    | Improved  |                |        |              |                       |            |                            |                               | TJ356 |

|                                                                                                           |                                                                   |                                                                               |                            |                                                                                                           |           |        |        |          |                       |                                             |                                                      |                               |        |
|-----------------------------------------------------------------------------------------------------------|-------------------------------------------------------------------|-------------------------------------------------------------------------------|----------------------------|-----------------------------------------------------------------------------------------------------------|-----------|--------|--------|----------|-----------------------|---------------------------------------------|------------------------------------------------------|-------------------------------|--------|
|                                                                                                           |                                                                   | 100 $\mu\text{M}$ <sup>49</sup>                                               | Lifespan                   | Mean, minimum, median and maximum lifespan                                                                | Improved  | n.d.   | N2     | L4       | OP50                  | NGM agar                                    | Added to the NGM                                     | 0.05% DMSO                    |        |
|                                                                                                           |                                                                   | 200 $\mu\text{M}$ <sup>50</sup>                                               | Lifespan                   | n.d.                                                                                                      | Improved  |        | N2     | L4       | OP50                  | NGM agar supplemented with 10–15 mM glucose | Added to the NGM                                     | n.d. concentration of DMSO    |        |
|                                                                                                           |                                                                   | 10 $\mu\text{M}$ <sup>8</sup>                                                 | ROS stress survival        | Induced with 250 $\mu\text{M}$ juglone                                                                    | Improved  | n.d.   | N2     | L1       | OP50                  | S medium                                    | Diluted in liquid                                    | 0.1% DMSO                     |        |
|                                                                                                           |                                                                   | 200 $\mu\text{M}$ <sup>51</sup>                                               | Thermal stress survival    | Induced with 35 °C                                                                                        | Improved  | n.d.   | N2     | L1       | Heat-inactivated OP50 | NGM agar                                    | Diluted in NGM                                       | 0.1% DMSO                     |        |
|                                                                                                           |                                                                   | 12.5 $\mu\text{g}/\text{ml}$ $\triangleq$ 41 $\mu\text{M}$ <sup>52</sup>      | Lifespan                   | Mean lifespan                                                                                             | Improved  | n.d.   | N2     | L4       | OP50                  | NGM agar                                    | n.d.                                                 | 0% DMSO                       |        |
|                                                                                                           |                                                                   |                                                                               | thermal stress survival    | Induced with 35 °C                                                                                        | Improved  |        |        |          |                       |                                             |                                                      |                               |        |
|                                                                                                           |                                                                   | 50 $\mu\text{M}$ <sup>53</sup>                                                | ROS stress survival        | Induced with 0.5mM H <sub>2</sub> O <sub>2</sub>                                                          | Improved  | n.d.   | N2     | L1       | OP50                  | NGM agar                                    | Diluted in autoclaved NGM                            | 0% DMSO                       |        |
|                                                                                                           |                                                                   |                                                                               | Thermal stress survival    | Induced with 35 °C                                                                                        | Improved  |        |        |          |                       |                                             |                                                      |                               |        |
|                                                                                                           |                                                                   | 3.3, 33 and 300 $\mu\text{M}$ <sup>54</sup>                                   | Lifespan                   | Survival after 14 days                                                                                    | Improved  | mtl-2  | N2     | L4       | OP50                  | S medium                                    | Diluted in liquid                                    | 1% DMSO                       |        |
|                                                                                                           |                                                                   |                                                                               | Proteotoxicity             | Paralysis assay with temperature-dependent amyloid beta expression in muscles                             | Improved  |        |        |          |                       |                                             |                                                      |                               | CL2659 |
| Quantification of YFP tagged $\alpha$ -synuclein expression in muscles by microscopy and image processing | Improved                                                          |                                                                               |                            | NL5901                                                                                                    | L4        |        |        |          |                       |                                             |                                                      |                               |        |
| 10 $\mu\text{M}$ <sup>6</sup>                                                                             | Proteotoxicity                                                    | Paralysis assay with temperature-dependent amyloid beta expression in muscles | No effect                  | n.d.                                                                                                      | CL2659    | L3     | OP50   | S medium | Diluted in liquid     | 1% DMSO                                     |                                                      |                               |        |
| <b>Kaempferol</b>                                                                                         | <chem>O=c1c(O)c(-c2ccc(O)cc2)oc2cc(O)cc(O)c12</chem>              | 100 $\mu\text{M}$ <sup>47g</sup>                                              | Lifespan                   | Mean, median and maximal lifespan                                                                         | Improved  | daf-16 | N2     | L4       | Heat-inactivated OP50 | NGM agar                                    | Added to the OP50 lawn                               | 0.2% Ethanol: Tween 80 (92:8) |        |
|                                                                                                           |                                                                   |                                                                               | Nuclear translocation      | DAF-16::GFP                                                                                               | Improved  |        | TJ356  |          |                       |                                             |                                                      |                               |        |
| <b>Naringenin</b>                                                                                         | <chem>O=C2c3c(O[C@H](c1ccc(O)cc1)C2)cc(O)cc3O</chem>              | 100 $\mu\text{M}$ <sup>47g</sup>                                              | Lifespan                   | Mean, median and maximal lifespan                                                                         | No effect | daf-16 | N2     | L4       | Heat-inactivated OP50 | NGM agar                                    | Added to the OP50 lawn                               | 0.2% Ethanol: Tween 80 (92:8) |        |
|                                                                                                           |                                                                   |                                                                               | Nuclear translocation      | DAF-16::GFP                                                                                               | Improved  |        | TJ356  |          |                       |                                             |                                                      |                               |        |
| <b>Maackiain</b>                                                                                          | <chem>C1[C@@H]2[C@H](C3=C(O1)C=C(C3)O)OC4=CC5=C(C=C24)OCOS</chem> | 50 and 250 $\mu\text{M}$ <sup>55</sup>                                        | Lifespan elongation        | Mean lifespan of animals treated with 6-OHDA                                                              | Improved  | pink-1 | N2     | L1       | OP50                  | NGM agar                                    | Added to the prepared plates before OP50 were seeded | n.d.                          |        |
|                                                                                                           |                                                                   |                                                                               | Proteotoxicity             | Quantification of YFP tagged $\alpha$ -synuclein expression in muscles by microscopy and image processing | Improved  |        | NL5901 |          |                       |                                             |                                                      |                               | L3     |
|                                                                                                           |                                                                   |                                                                               | Neurodegeneration          | 6-OHDA induced neurodegeneration monitored by GFP tagged dopamine transporter expression                  | Improved  |        | BZ555  |          |                       |                                             |                                                      |                               | L1     |
| <b>Brazilin</b>                                                                                           | <chem>C1C2=CC(=C(C=C2)[C@H]3[C@@]1(COC4=C3C=CC(=C4)O)O)O</chem>   | 50 and 100 $\mu\text{M}$ <sup>56</sup>                                        | Lifespan                   | Mean lifespan                                                                                             | Improved  | n.d.   | N2     | L1       | OP50                  | Solid agar                                  | Diluted in autoclaved NGM                            | 0.1% DMSO                     |        |
|                                                                                                           |                                                                   |                                                                               | Locomotion                 | Travel range/ Speed                                                                                       | Improved  |        |        |          |                       |                                             |                                                      |                               |        |
|                                                                                                           |                                                                   |                                                                               | Pharyngeal pumping         | Pumping rate                                                                                              | No effect |        |        |          |                       |                                             |                                                      |                               |        |
|                                                                                                           |                                                                   |                                                                               | Thermal stress survival    | Induced with 37°C                                                                                         | Improved  |        |        |          |                       |                                             |                                                      |                               |        |
|                                                                                                           |                                                                   |                                                                               | ROS stress survival        | Induced with 900 $\mu\text{M}$ juglone                                                                    | Improved  |        |        |          |                       |                                             |                                                      |                               |        |
|                                                                                                           |                                                                   |                                                                               | Hypertonic stress survival | Induced with 500 mM NaCl                                                                                  | Improved  |        |        |          |                       |                                             |                                                      |                               |        |
|                                                                                                           |                                                                   |                                                                               | Antioxidative capacity     | Measurement of intracellular dichlorofluorescein fluorescence after incubation with juglone               | Improved  |        |        |          |                       |                                             |                                                      |                               |        |
| <b>Vitexin</b>                                                                                            | <chem>C1=CC(=CC=C1C2=CC(=O)C3=C(O2)C</chem>                       | 10.35 $\mu\text{g}/\text{mL}$ $\triangleq$ 23.9 $\mu\text{M}$ <sup>57</sup>   | Lifespan                   | Mean Lifespan                                                                                             | No effect | n.d.   | N2     | L4       | Heat-inactivated OP50 | S Medium                                    | Diluted in liquid                                    | 0.6% DMSO                     |        |

|                   |                                                                                                      |                                                |                         |                                                                                                   |           |                                                                                          |        |       |                       |                      |                       |           |         |
|-------------------|------------------------------------------------------------------------------------------------------|------------------------------------------------|-------------------------|---------------------------------------------------------------------------------------------------|-----------|------------------------------------------------------------------------------------------|--------|-------|-----------------------|----------------------|-----------------------|-----------|---------|
|                   | <chem>=C(C=C3O)[C@H]4[C@@H]([C@H]([C@@H]([C@H](O4)CO)O)O)O</chem>                                    |                                                |                         |                                                                                                   |           |                                                                                          |        |       |                       |                      |                       |           |         |
| <b>Isovitexin</b> | <chem>C1=CC(=CC=C1C2=CC(=O)C3=C(O2)C=C(C=C3O)[C@H]4[C@@H]([C@H]([C@@H]([C@H](O4)CO)O)O)O</chem>      | 20.99 µg/mL ± 48.6 µM <sup>57</sup>            | Lifespan                | Mean Lifespan                                                                                     | Improved  | n.d.                                                                                     | N2     | L4    | Heat-inactivated OP50 | S Medium             | Diluted in liquid     | 0.6% DMSO |         |
|                   |                                                                                                      | 2 and 20 µg/ml ± 4.6 and 46.2 µM <sup>58</sup> | Thermal stress survival | Induced with 37 °C                                                                                | Improved  |                                                                                          |        |       | L1                    | UV inactivated W3110 |                       |           | 1% DMSO |
|                   |                                                                                                      |                                                | ROS stress survival     | Induced with 250 µM juglone                                                                       | No effect |                                                                                          |        |       |                       |                      |                       |           |         |
| ROS levels        | Measurement of dichlorofluorescein fluorescence                                                      | Improved                                       |                         |                                                                                                   |           |                                                                                          |        |       |                       |                      |                       |           |         |
| <b>Liquiritin</b> | <chem>C1[C@H](OC2=C(C1=O)C=CC(=C2)O)C3=CC=C(C=C3)O[C@H]4[C@@H]([C@H]([C@@H]([C@H](O4)CO)O)O)O</chem> | 2 mM <sup>44</sup>                             | Lifespan                | T <sub>50</sub>                                                                                   | Improved  | n.d.                                                                                     | NL5901 | Adult | OP50                  | NGM agar             | n.d.                  | 4% DMSO   |         |
|                   |                                                                                                      |                                                | Proteotoxicity          | Quantification of YFP tagged α-synuclein expression in muscles by microscopy and image processing | No effect |                                                                                          |        |       |                       |                      |                       |           |         |
| <b>Orientin</b>   | <chem>C1=CC(=C(C=C1C2=CC(=O)C3=C(O2)C=C(C=C3O)[C@H]4[C@@H]([C@H]([C@@H]([C@H](O4)CO)O)O)O)O</chem>   | 25, 50, 100 and 200 µM <sup>59</sup>           | Lifespan                | Mean Lifespan                                                                                     | Improved  | daf-16, daf-2, age-1, akt-1, akt-2, sir-2.1, aak-2, isq-1, mev-1, glp-1, hsf-1 and clk-1 | N2     | L4    | Heat-inactivated OP50 | NGM agar             | Sprayed onto NGM      | 0% DMSO   |         |
|                   |                                                                                                      |                                                | Locomotion              | Number of body bends                                                                              | Improved  |                                                                                          |        |       |                       |                      |                       |           |         |
|                   |                                                                                                      |                                                | Autofluorescence        | Microscopy and image processing (n.d. filter)                                                     | Improved  |                                                                                          |        |       |                       |                      |                       |           |         |
|                   |                                                                                                      |                                                | ROS stress survival     | Induced with 20 mM paraquat                                                                       | Improved  |                                                                                          |        |       |                       |                      |                       |           |         |
|                   |                                                                                                      |                                                | Antioxidative capacity  | Measurement of dichlorofluorescein fluorescence after incubation with paraquat                    | Improved  |                                                                                          |        |       |                       |                      |                       |           |         |
|                   |                                                                                                      |                                                | Thermal stress survival | Induced with 35 °C                                                                                | Improved  |                                                                                          |        |       |                       |                      |                       |           |         |
|                   |                                                                                                      |                                                | Nuclear translocation   | DAF-16::GFP                                                                                       | No effect |                                                                                          | TJ356  |       |                       |                      |                       |           |         |
|                   |                                                                                                      |                                                | Proteotoxicity          | Paralysis assay with constitutive age -dependent polyglutamine aggregation in muscles             | Improved  |                                                                                          | AM141  |       |                       |                      |                       |           |         |
|                   |                                                                                                      |                                                |                         | Paralysis assay with temperature-dependent amyloid beta expression in muscles                     | Improved  |                                                                                          | CL4176 | L1    |                       |                      |                       |           |         |
|                   |                                                                                                      |                                                |                         | Number of body bends of aged muscle α-synuclein expressing worms                                  | Improved  |                                                                                          | NL5901 | n.d.  |                       |                      |                       |           |         |
|                   | Quantification of YFP tagged α-synuclein expression in muscles by microscopy and image processing    | Improved                                       |                         | n.d.                                                                                              |           |                                                                                          |        |       |                       |                      |                       |           |         |
| Neurodegeneration | 6-OHDA induced neurodegeneration monitored by GFP tagged dopamine transporter expression             | Improved                                       | BZ555                   | L3                                                                                                |           |                                                                                          |        |       |                       |                      |                       |           |         |
| <b>Astragalin</b> | <chem>C1=CC(=CC=C1C2=CC(=O)C3=C(C=C(C=C3O2)O)O)[C@H]4[C@@H]([C@H]([C@@H]([C@H](O4)CO)O)O)O</chem>    | 2 µg/ml ± 4.5 µM <sup>60</sup>                 | Lifespan                | Mean lifespan                                                                                     | Improved  | n.d.                                                                                     | N2     | L4    | OP50                  | NGM agar             | Added to NGM and OP50 | 0.05%     |         |
|                   |                                                                                                      |                                                | Locomotion              | Wave initiation rate, activity index, brush stroke and body wave number                           | No effect |                                                                                          |        |       |                       |                      |                       |           |         |
|                   |                                                                                                      |                                                | Thermal stress survival | Induced with 37 °C                                                                                | Improved  |                                                                                          |        |       |                       |                      |                       |           |         |
| <b>Myricitrin</b> | <chem>[C@H]1[C@@H]([C@H]([C@@H]([C@H](O1)OC2=CC(=CC(=C3C2=O)O)O)C4=CC(=</chem>                       | 10 µM <sup>8</sup>                             | ROS stress survival     | Induced with 250 µM juglone                                                                       | Improved  | n.d.                                                                                     | N2     | L1    | OP50                  | S medium             | Diluted in liquid     | 0.1% DMSO |         |

|                                         |                                                                                                                           |                                                |                         |                                                                                                    |           |                                                  |    |    |                                       |          |                              |           |
|-----------------------------------------|---------------------------------------------------------------------------------------------------------------------------|------------------------------------------------|-------------------------|----------------------------------------------------------------------------------------------------|-----------|--------------------------------------------------|----|----|---------------------------------------|----------|------------------------------|-----------|
|                                         | C(C=C4)O)O)O)O)O                                                                                                          |                                                |                         |                                                                                                    |           |                                                  |    |    |                                       |          |                              |           |
| <b>Quercitrin</b>                       | C[C@H]1[C@@H]([C@H]([C@@H]([O1)OC2=C(OC3=CC(=CC(=C3C2=O)O)C4=CC(=C(C=C4)O)O)O)O)O                                         | 10 μM <sup>8</sup>                             | ROS stress survival     | Induced with 250 μM juglone                                                                        | Improved  | n.d.                                             | N2 | L1 | OP50                                  | S medium | Diluted in liquid            | 0.1% DMSO |
| <b>Quercetin 3-O-β-D-apiofuranoside</b> | OC1=C(CC(O)=C(C2=CC(O)=C(O)C=C2)O)C3=CC(O[C@@H]4[C@H](O)[C@]([CO](O)CO4)=C1                                               | 2 and 20 μg/ml ±4.6 and 46.1 μM <sup>58</sup>  | Thermal stress survival | Induced with 37 °C                                                                                 | No effect | n.d.                                             | N2 | L1 | UV-inactivated W3110                  | S medium | Diluted in liquid            | 1% DMSO   |
|                                         |                                                                                                                           |                                                | ROS stress survival     | Induced with 250 μM juglone                                                                        | Improved  |                                                  |    |    |                                       |          |                              |           |
|                                         |                                                                                                                           |                                                | ROS levels              | Measurement of dichlorofluorescein fluorescence                                                    | Improved  |                                                  |    |    |                                       |          |                              |           |
| <b>Swertisin</b>                        | COC1=C(C=C2C(C=C1)OC(=CC2=O)C3=CC=C(C=C3)O)O[C@@H]4[C@@H]([C@@H]([C@@H]([C@@H](O4)CO)O)O)O                                | 50, 250 and 500 μM <sup>61</sup>               | Thermal stress survival | Induced with 35 °C                                                                                 | Improved  | n.d.                                             | N2 | L1 | OP50                                  | NGM agar | Added to OP50                | n.d.      |
|                                         |                                                                                                                           |                                                | ROS stress survival     | Induced with 0.01% H <sub>2</sub> O <sub>2</sub>                                                   | Improved  |                                                  |    |    |                                       |          |                              |           |
|                                         |                                                                                                                           |                                                | Antioxidative capacity  | Measurement of dichlorofluorescein fluorescence after incubation at 35 °C                          | Improved  |                                                  |    |    |                                       |          |                              |           |
| <b>Naringin</b>                         | C[C@H]1[C@@H]([C@H]([C@@H]([O1)O[C@@H]2[C@H]([C@@H]([C@H](O[C@@H]2OC3=CC(=C4C(=O)[C@H](OC4=C3)C5=CC=C(C=C5)O)O)CO)O)O)O)O | 50 μM <sup>62</sup>                            | Lifespan                | Mean Lifespan                                                                                      | Improved  | daf-16, daf-2, akt-1, akt-2, hsf-1, clk-1, rsk-1 | N2 | L4 | OP50<br>Heat-inactivated OP50<br>OP50 | NGM agar | Added to the prepared plates | 0% DMSO   |
|                                         |                                                                                                                           |                                                | Locomotion              | Number of body bends                                                                               |           |                                                  |    |    |                                       |          |                              |           |
|                                         |                                                                                                                           |                                                | Autofluorescence        | Microscopy and image processing (GFP filter)                                                       |           |                                                  |    |    |                                       |          |                              |           |
|                                         |                                                                                                                           |                                                | ROS stress survival     | Induced with 20 mM paraquat                                                                        |           |                                                  |    |    |                                       |          |                              |           |
|                                         |                                                                                                                           |                                                | Antioxidative capacity  | Measurement of dichlorofluorescein fluorescence after treatment with H <sub>2</sub> O <sub>2</sub> |           |                                                  |    |    |                                       |          |                              |           |
|                                         |                                                                                                                           |                                                | Thermal stress survival | Induced with 35 °C                                                                                 |           |                                                  |    |    |                                       |          |                              |           |
|                                         |                                                                                                                           |                                                | Proteintoxicity         | Paralysis assay with temperature-dependent amyloid beta expression in muscles                      |           |                                                  |    |    |                                       |          |                              |           |
|                                         |                                                                                                                           |                                                |                         | Quantification of YFP tagged α-synuclein expression in muscles by microscopy and image processing  |           |                                                  |    |    |                                       |          |                              |           |
|                                         |                                                                                                                           |                                                | Neurodegeneration       | 6-OHDA induced neurodegeneration monitored by GFP tagged dopamine transporter expression           |           |                                                  |    |    |                                       |          |                              |           |
| Nuclear translocation                   | DAF-16::GFP                                                                                                               |                                                |                         |                                                                                                    |           |                                                  |    |    |                                       |          |                              |           |
| <b>Lonicerin</b>                        | C[C@H]1[C@@H]([C@H]([C@@H]([O1)O[C@@H]2[C@H]([C@@H]([C@H](O[C@@H]2OC3=CC(=C4C(=C3)OC(=CC4=O)C5=CC=C(C=C5)O)O)CO)O)O)O)O   | 2 and 20 μg/ml ± 3.4 and 33.6 μM <sup>58</sup> | Thermal stress survival | Induced with 37 °C                                                                                 | No effect | n.d.                                             | N2 | L1 | UV inactivated W3110                  | S medium | Diluted in liquid            | 1% DMSO   |
|                                         |                                                                                                                           |                                                | ROS stress survival     | Induced with 250 μM juglone                                                                        | No effect |                                                  |    |    |                                       |          |                              |           |
|                                         |                                                                                                                           |                                                | ROS levels              | Measurement of dichlorofluorescein fluorescence                                                    | Improved  |                                                  |    |    |                                       |          |                              |           |
| <b>Rutin</b>                            | C[C@H]1[C@@H]([C@H]([C@@H]([O1)O[C@@H]2[C@H]([C@@H]([C@H](O[C@@H]2OC3=CC(=C4C(=C3)OC(=CC4=O)C5=CC=C(C=C5)O)O)CO)O)O)O)O   | 163 - 1310                                     | ROS stress survival     | Induced with 100 mM H <sub>2</sub> O <sub>2</sub>                                                  | No effect | n.d.                                             | N2 | A  | No food                               | S Medium | Diluted in liquid            | 0.7% EtOH |

|                                                                                                                             |                                                                                                                                                                             |                                                                 |                                                                               |                                                 |           |      |        |      |                      |                  |                   |           |
|-----------------------------------------------------------------------------------------------------------------------------|-----------------------------------------------------------------------------------------------------------------------------------------------------------------------------|-----------------------------------------------------------------|-------------------------------------------------------------------------------|-------------------------------------------------|-----------|------|--------|------|----------------------|------------------|-------------------|-----------|
|                                                                                                                             | [C@H]([C@H]([C@H]([O1]OC[C@H]2[C@H]([C@H]([C@H]([C@H]([O2]OC3=C(O)C4=CC(=CC(=C4C3=O)O)O)C5=CC(=C(C=C5)O)O)O)O)O)O                                                           | $\mu\text{M}^{63}$                                              |                                                                               | Induced with 100 $\mu\text{M}$ juglone          | Improved  | n.d. | N2     | L4   | OP50                 | NGM agar         | Added to the NGM  | 0.2% DMSO |
|                                                                                                                             |                                                                                                                                                                             |                                                                 |                                                                               | Induced with 100 $\mu\text{M}$ Fe <sup>2+</sup> | Improved  |      |        |      |                      |                  |                   |           |
|                                                                                                                             |                                                                                                                                                                             |                                                                 |                                                                               | Induced with 50 mM sodium nitroprusside         | Improved  |      |        |      |                      |                  |                   |           |
|                                                                                                                             |                                                                                                                                                                             | 100 $\mu\text{M}^{64}$                                          | Lifespan                                                                      | Mean and maximum lifespan                       | Improved  |      |        |      |                      |                  |                   |           |
|                                                                                                                             |                                                                                                                                                                             | Locomotion                                                      | Motility classes                                                              | Improved                                        |           |      |        |      |                      |                  |                   |           |
|                                                                                                                             | 80 $\mu\text{g/ml} \cong 131 \mu\text{M}^{29}$                                                                                                                              | Lifespan                                                        | Median and maximum lifespan                                                   | No effect                                       | n.d.      | N2   | L4     | OP50 | NGM agar             | Added to the NGM | 0% DMSO           |           |
|                                                                                                                             |                                                                                                                                                                             |                                                                 | No effect                                                                     |                                                 |           |      |        |      |                      |                  |                   |           |
|                                                                                                                             |                                                                                                                                                                             | Proteotoxicity                                                  | Paralysis assay with temperature-dependent amyloid beta expression in muscles | No effect                                       |           |      |        |      |                      |                  |                   |           |
| <b>Kaempferol 3-O-{2"-glucopyranosyl}-rutinoside</b>                                                                        | O(C1=C(OC=2C(C1=O)=C(O)C=C(O)C2)C3=CC=C(O)C=C3)[C@H]4[C@H](O[C@@H]5O[C@H](CO)[C@@H](O)[C@H](O)[C@H]5O)[C@@H](O)[C@H](O)[C@@H](CO)[C@H]6[C@H](O)[C@H](O)[C@@H](O)[C@H](CO)O4 | 0.24 $\mu\text{g/ml} \cong 317 \text{ nM}^{65}$                 | ROS stress survival                                                           | Induced with 250 $\mu\text{M}$ juglone          | Improved  | n.d. | N2     | L1   | OP50                 | S Medium         | Diluted in liquid | n.d.      |
| <b>Camelliaside B</b>                                                                                                       | O(C1=C(OC=2C(C1=O)=C(O)C=C(O)C2)C3=CC=C(O)C=C3)[C@H]4[C@H](O[C@@H]5[C@H](O)[C@@H](O)[C@H](O)CO5)[C@@H](O)[C@H](O)[C@@H](CO)[C@H]6[C@H](O)[C@H](O)[C@@H](O)[C@H](CO)O4       | 0.21 $\mu\text{g/ml} \cong 289 \text{ nM}^{65}$                 | ROS stress survival                                                           | Induced with 250 $\mu\text{M}$ juglone          | Improved  | n.d. | N2     | L1   | OP50                 | S Medium         | Diluted in liquid | n.d.      |
| <b>Apigenin 6-C-<math>\beta</math>-D-apiofuranosyl-(1 <math>\rightarrow</math> 2)]<math>\beta</math>-D-glucopyranoside</b>  | O=C1C=C(OC2=CC(O)=C(C(O)=C21)[C@@H]3O[C@@H]([C@H]([C@@H]([C@H]3O[C@H]4[C@@H]([C@@](O)(CO4)CO)O)O)C5=CC=C(C=C5)O                                                             | 2 and 20 $\mu\text{g/ml} \cong 3.5$ and 35.4 $\mu\text{M}^{58}$ | Thermal stress survival                                                       | Induced with 37 °C                              | Improved  | n.d. | N2     | L1   | UV inactivated W3110 | S medium         | Diluted in liquid | 1% DMSO   |
|                                                                                                                             |                                                                                                                                                                             | ROS stress survival                                             | Induced with 250 $\mu\text{M}$ juglone                                        | Improved                                        |           |      |        |      |                      |                  |                   |           |
|                                                                                                                             |                                                                                                                                                                             | ROS levels                                                      | Measurement of dichlorofluorescein fluorescence                               | Improved                                        |           |      |        |      |                      |                  |                   |           |
| <b>Luteolin 6-C-<math>\beta</math>-D-apiofuranosyl-(1 <math>\rightarrow</math> 2)]-<math>\beta</math>-D-glucopyranoside</b> | O=C1C=C(OC2=CC(O)=C(C(O)=C21)[C@@H]3O[C@@H]([C@H]([C@@H]([C@H]3O[C@H]4[C@@H]([C@@](O)(CO4)CO)O)O)C5=CC(O)=C(C=C5)O                                                          | 2 and 20 $\mu\text{g/ml} \cong 3.4$ and 34.5 $\mu\text{M}^{58}$ | Thermal stress survival                                                       | Induced with 37 °C                              | Improved  | n.d. | N2     | L1   | UV inactivated W3110 | S medium         | Diluted in liquid | 1% DMSO   |
|                                                                                                                             |                                                                                                                                                                             | ROS stress survival                                             | Induced with 250 $\mu\text{M}$ juglone                                        | Improved                                        |           |      |        |      |                      |                  |                   |           |
|                                                                                                                             |                                                                                                                                                                             | ROS levels                                                      | Measurement of dichlorofluorescein fluorescence                               | Improved                                        |           |      |        |      |                      |                  |                   |           |
| <b>Silybin A</b>                                                                                                            | OC[C@@H]1[C@                                                                                                                                                                | 50 $\mu\text{M}^{66}$                                           | Proteotoxicity                                                                | Paralysis assay with temperature-dependent      | No effect | n.d. | CL4176 | L3   | OP50                 | NGM agar         | n.d.              | 1% DMSO   |

|                                                  |                                                                                                                  |                                |                |                                                                               |          |               |        |       |                     |          |                           |           |
|--------------------------------------------------|------------------------------------------------------------------------------------------------------------------|--------------------------------|----------------|-------------------------------------------------------------------------------|----------|---------------|--------|-------|---------------------|----------|---------------------------|-----------|
|                                                  | <chem>@H](C2=CC(OC)=C(C=C2)O)OC3=CC(C4OC5=CC(O)=CC(O)=C5C([C@@H]4O)=O)=CC=C3O1</chem>                            |                                |                | amyloid beta expression in muscles                                            |          |               |        |       |                     |          |                           |           |
| <b>Silybin B</b>                                 | <chem>C(O)[C@H]1[C@@H](OC=2C(O1)=CC=C(C2)[C@H]3OC=4C(C(=O)[C@@H]3O)=C(O)C=C(O)C4)C5=CC(OC)=C(O)C=C5</chem>       | 50 $\mu\text{M}$ <sup>66</sup> | Proteotoxicity | Paralysis assay with temperature-dependent amyloid beta expression in muscles | Improved | n.d.          | CL4176 | L3    | OP50                | NGM agar | n.d.                      | 1% DMSO   |
| <b>Silybin A/B (10 <math>\mu\text{M}</math>)</b> | <chem>OCC1C(C2=CC(OC)=C(C=C2)O)OC3=CC(C4OC5=CC(O)=C(O)=C5C([C@@H]4O)=O)=CC=C3O1</chem>                           | 10 $\mu\text{M}$ <sup>67</sup> | Lifespan       | Mean lifespan                                                                 | Improved | n.d.          | N2     | Adult | UV-inactivated OP50 | NGM agar | Added onto bacterial lawn | DMSO (1%) |
| <b>Isosilybin A</b>                              | <chem>COC1=C(C=CC=C1)[C@@H]2[C@H](OC3=C(O2)C=CC(=C3)[C@@H]4[C@@H](C(=O)C5=C(C=C(C=C5O4)O)O)CO)O</chem>           | 10 $\mu\text{M}$ <sup>67</sup> | Lifespan       | Mean lifespan                                                                 | Improved | n.d.          | N2     | Adult | UV-inactivated OP50 | NGM agar | Added onto bacterial lawn | DMSO (1%) |
| <b>Silychristin A/B,</b>                         | <chem>COC1=C(C=CC=C1)[C@H]2[C@@H](C3=C(O2)C=CC(=C3)[C@@H]4[C@@H](C(=O)C5=C(C=C(C=C5O4)O)O)CO)O</chem>            | 10 $\mu\text{M}$ <sup>67</sup> | Lifespan       | Mean lifespan                                                                 | Improved | n.d.          | N2     | Adult | UV-inactivated OP50 | NGM agar | Added onto bacterial lawn | DMSO (1%) |
| <b>Silydianin A/B</b>                            | <chem>COC1=C(C=CC=C1)[C@@H]2[C@H]3CO[C@@]4([C@H]3C(=C[C@H]2C4=O)[C@@H]5[C@H](C(=O)C6=C(C=C(C=C6O5)O)O)O)O</chem> | 10 $\mu\text{M}$ <sup>67</sup> | Lifespan       | Mean lifespan                                                                 | Improved | n.d.          | N2     | Adult | UV-inactivated OP50 | NGM agar | Added onto bacterial lawn | DMSO (1%) |
| <b>Dehydrosilybin A</b>                          | <chem>OC[C@@H]1[C@@H](C2=CC(OC)=C(C=C2)O)OC3=CC(C4OC5=CC(O)=CC(O)=C5C([C@@H]4O)=O)=CC=C3O1</chem>                | 10 $\mu\text{M}$ <sup>67</sup> | Lifespan       | Mean lifespan                                                                 | Improved | fgt-1, daf-16 | N2     | Adult | UV-inactivated OP50 | NGM agar | Added onto bacterial lawn | DMSO (1%) |
|                                                  | <chem>OC[C@@H]1[C@@H](C2=CC(OC)=C(C=C2)O)OC3=CC(C4OC5=CC(O)=CC(O)=C5C([C@@H]4O)=O)=CC=C3O1</chem>                | 50 $\mu\text{M}$ <sup>66</sup> | Proteotoxicity | Paralyzed with amyloid beta in muscles                                        | Improved | n.d.          | CL4176 | L3    | OP50                | NGM agar | n.d.                      | DMSO (1%) |
| <b>Dehydrosilybin B</b>                          | <chem>OC[C@H]1[C@H](C2=CC(OC)=C(C=C2)O)OC3=CC(C4OC5=CC(O)=CC(O)=C5C([C@@H]4O)=O)=CC=C3O1</chem>                  | 10 $\mu\text{M}$ <sup>67</sup> | Lifespan       | Mean lifespan                                                                 | Improved | fgt-1, daf-16 | N2     | Adult | UV-inactivated OP50 | NGM agar | Added onto bacterial lawn | DMSO (1%) |
|                                                  | <chem>OC[C@H]1[C@H](C2=CC(OC)=C(C=C2)O)OC3=CC(C4OC5=CC(O)=CC(O)=C5C([C@@H]4O)=O)=CC=C3O1</chem>                  | 50 $\mu\text{M}$ <sup>66</sup> | Proteotoxicity | Paralyzed with amyloid beta in muscles                                        | Improved | n.d.          | CL4176 | L3    | OP50                | NGM agar | n.d.                      | DMSO (1%) |

|                                           |                                                                                                  |                                                              |                     |                                                                               |             |               |    |        |                     |          |                           |           |
|-------------------------------------------|--------------------------------------------------------------------------------------------------|--------------------------------------------------------------|---------------------|-------------------------------------------------------------------------------|-------------|---------------|----|--------|---------------------|----------|---------------------------|-----------|
|                                           | C=C3O1                                                                                           |                                                              |                     |                                                                               |             |               |    |        |                     |          |                           |           |
| <b>2,3-Dehydrosilybin A/B</b>             | OCC1C(C2=CC(OC)=C(C=C2)O)OC3=C(C(OC4=CC(O)=C(C(O)=C45)=C(O)C5=O)=CC=C3O1                         | 5, 10 and 20 $\mu\text{M}$ <sup>67</sup>                     | Lifespan            | Mean lifespan                                                                 | Improved    | fgt-1, daf-16 | N2 | Adult  | UV-inactivated OP50 | NGM agar | Added onto bacterial lawn | DMSO (1%) |
|                                           |                                                                                                  |                                                              | Pharyngeal Pumping  | Pumping rate                                                                  | Improved    |               |    |        |                     |          |                           |           |
|                                           |                                                                                                  |                                                              | ROS stress survival | Induced with 80 $\mu\text{M}$ juglone                                         | Improved    |               |    | GMC101 |                     |          |                           |           |
|                                           |                                                                                                  |                                                              | Proteotoxicity      | Paralyzed with amyloid beta in muscles                                        | Improved    |               |    |        |                     |          |                           |           |
|                                           |                                                                                                  |                                                              |                     |                                                                               |             |               |    |        |                     |          |                           |           |
| <b>7-Methoxy-dehydrosilybin A/B</b>       | OCC1C(C2=CC(OC)=C(C=C2)O)OC3=C(C(OC4=CC(OC)=CC(O)=C45)=C(O)C5=O)=CC=C3O1                         | 10 $\mu\text{M}$ <sup>67</sup>                               | Lifespan            | Mean lifespan                                                                 | No effect   | n.d.          | N2 | Adult  | UV-inactivated OP50 | NGM agar | Added onto bacterial lawn | DMSO (1%) |
| <b>3,7-Dimethoxy - dehydrosilybin A/B</b> | OCC1C(C2=CC(OC)=C(C=C2)O)OC3=C(C(OC4=CC(OC)=CC(O)=C45)=C(O)C5=O)=CC=C3O1                         | 10 $\mu\text{M}$ <sup>67</sup>                               | Lifespan            | Mean lifespan                                                                 | Detrimental | n.d.          | N2 | Adult  | UV-inactivated OP50 | NGM agar | Added onto bacterial lawn | DMSO (1%) |
| <b>20-galloyl-dehydrosilybin A/B</b>      | O=C(C1=CC(O)=C(C(O)=C1)O)OC2=C(C=C(C3OC4=C(OC3CO)C=CC(C(OC5=C6C(O)=CC(O)=C5)=C(O)C6=O)=C4)C=C2OC | 10 $\mu\text{M}$ <sup>67</sup>                               | Lifespan            | Mean lifespan                                                                 | No effect   | n.d.          | N2 | Adult  | UV-inactivated OP50 | NGM agar | Added onto bacterial lawn | DMSO (1%) |
| <b>Cyanidin 3-O-glucoside</b>             | C1=CC(=C(C=C1C2=[O+][C3=CC(=CC(=C3C=C2O)[C@H]4[C@@H]([C@H]([C@@H]([C@H](O4)CO)O)O)O)O)O)O.[Cl-]  | 154 $\mu\text{g/ml}$ $\pm$ 347.3 $\mu\text{M}$ <sup>29</sup> | Lifespan            | Median and maximum lifespan                                                   | Improved    | n.d.          | N2 | L4     | OP50                | NGM agar | Added to the NGM          | 0% DMSO   |
|                                           |                                                                                                  |                                                              | Proteotoxicity      | Paralysis assay with temperature-dependent amyloid beta expression in muscles | Improved    |               |    | L1     |                     |          |                           |           |



Table SI 8. Stilbenes

| Compound                          | Structure (Smiles)                                   | Dose [Ref]                                          | Experiment                  | Parameters                                                                 | Effect                  | Involved Genes | Strain                | Treat. Start | Food                         | Media                                    | Treatment application                            | Vector    |                                                                            |           |      |
|-----------------------------------|------------------------------------------------------|-----------------------------------------------------|-----------------------------|----------------------------------------------------------------------------|-------------------------|----------------|-----------------------|--------------|------------------------------|------------------------------------------|--------------------------------------------------|-----------|----------------------------------------------------------------------------|-----------|------|
| Resveratrol                       | <chem>OC1=CC(/C=C/C2=CC=C(O)C=C2)=CC(O)=C1</chem>    | 100 µM <sup>68</sup>                                | Lifespan                    | Mean lifespan                                                              | Improved                | n.d.           | N2                    | L1           | OP50                         | NGM agar                                 | Poured into petri dishes before OP50 were seeded | 0.2% DMSO |                                                                            |           |      |
|                                   |                                                      | 100 µM <sup>53</sup>                                | Lifespan                    | Mean lifespan                                                              | Improved                | n.d.           | N2                    | L1           | OP50                         | NGM agar                                 | Diluted in autoclaved NGM                        | 0% DMSO   |                                                                            |           |      |
|                                   |                                                      | 100 µM <sup>41</sup>                                | Lifespan                    | median lifespan                                                            | Improved                | n.d.           | N2                    | L1           | OP50                         | NGM agar                                 | Diluted in OP50 stock                            | 0.2% DMSO |                                                                            |           |      |
|                                   |                                                      | 50, 100, or 200 µM <sup>69</sup>                    | Lifespan                    | Mean lifespan                                                              | No effect               | n.d.           | N2                    | A            | OP50                         | NGM agar                                 | Added to NGM                                     |           | Added to NGM                                                               |           |      |
|                                   |                                                      |                                                     |                             |                                                                            | Detrimental             |                |                       |              |                              | S-medium                                 | Diluted in liquid                                |           |                                                                            |           |      |
|                                   |                                                      |                                                     |                             |                                                                            | Improved                |                |                       |              |                              | NGM agar supplemented with 50 mM glucose |                                                  |           |                                                                            |           |      |
|                                   |                                                      | ROS stress survival                                 | Induced with 0.4 mM juglone | Improved                                                                   | L1                      | S-medium       | Diluted in liquid     |              |                              |                                          |                                                  |           |                                                                            |           |      |
|                                   |                                                      | 100 µM <sup>70</sup>                                | Lifespan                    | Mean and maximum lifespan                                                  | No effect               | n.d.           | N2                    | L4           | Heat-inactivated OP50        | Liquid NGM                               | Diluted in liquid                                | 0.1% DMSO |                                                                            |           |      |
|                                   |                                                      |                                                     |                             |                                                                            | Locomotion              |                |                       |              |                              |                                          |                                                  |           | Motility classes                                                           | No effect | n.d. |
|                                   |                                                      |                                                     |                             |                                                                            | Antioxidative capacity  |                |                       |              |                              |                                          |                                                  |           | Measurement of dichlorofluorescein fluorescence during incubation at 37 °C | No effect | n.d. |
|                                   |                                                      |                                                     |                             |                                                                            | Thermal stress survival |                |                       |              |                              |                                          |                                                  |           | Induced with 37 °C                                                         | No effect | n.d. |
|                                   |                                                      |                                                     |                             |                                                                            | Nuclear translocation   |                |                       |              |                              |                                          |                                                  |           | DAF-16::GFP                                                                | No effect | n.d. |
|                                   |                                                      | SKN-1::GFP                                          | No effect                   | n.d.                                                                       |                         | LD1            |                       |              |                              |                                          |                                                  |           |                                                                            |           |      |
|                                   |                                                      | 100. 500 and 1000 µM <sup>71</sup>                  | Lifespan                    | Mean lifespan                                                              | Improved                | sir-2.1        | N2                    | A            | OP50                         | NGM agar                                 | Added to NGM                                     | 0.3% DMSO |                                                                            |           |      |
| 100 µM <sup>72</sup>              | Lifespan                                             | Mean, median, maximal lifespan                      | Improved                    | n.d.                                                                       | N2                      | L4             | OP50                  | NGM agar     | Diluted in OP50 stock        | 0.2% DMSO                                |                                                  |           |                                                                            |           |      |
|                                   | Autofluorescence                                     | Microscopy and image processing (365/420 nm filter) | Improved                    |                                                                            |                         |                |                       |              |                              |                                          |                                                  |           |                                                                            |           |      |
| 500 µM <sup>73</sup>              | Lifespan                                             | Mean lifespan                                       | Improved                    | daf-16, skn-1, hsf-1                                                       | N2                      | L1             | n.d.                  | NGM agar     | n.d.                         | n.d. concentration of DMSO n.d.          |                                                  |           |                                                                            |           |      |
|                                   | ROS stress survival                                  | Induced with 10 mM paraquat                         | Improved                    |                                                                            |                         |                |                       |              |                              |                                          |                                                  |           |                                                                            |           |      |
|                                   | Thermal stress survival                              | Induced with 35 °C                                  | Improved                    |                                                                            |                         |                |                       |              |                              |                                          |                                                  |           |                                                                            |           |      |
|                                   | Nuclear translocation                                | DAF-16::GFP                                         | Improved                    |                                                                            |                         |                |                       |              |                              |                                          | TJ356                                            |           |                                                                            |           |      |
| Oxyresveratrol                    | <chem>C1=CC(=C(C=C1O)O)/C=C/C2=CC(=C(C=C2)O)O</chem> | 100. 500 and 1000 µM <sup>71</sup>                  | Lifespan                    | Mean lifespan                                                              | Improved                | sir-2.1        | N2                    | A            | OP50                         | NGM agar                                 | Added to NGM                                     | 0.3% DMSO |                                                                            |           |      |
|                                   |                                                      | 25, 50 and 100 µM <sup>72</sup>                     | Lifespan                    | Mean, median, maximal lifespan                                             | Improved                | n.d.           | N2                    | L4           | OP50                         | NGM agar                                 | Diluted in OP50 stock                            | 0.2% DMSO |                                                                            |           |      |
|                                   |                                                      |                                                     | Autofluorescence            | Microscopy and image processing (365/420 nm filter)                        | Improved                |                |                       |              |                              |                                          |                                                  |           |                                                                            |           |      |
| 10,25,50 and 100 µM <sup>74</sup> | Lifespan                                             | Mean lifespan measured by lifespan machine          | Improved                    | n.d.                                                                       | N2                      | L4             | Heat-inactivated OP50 | NGM agar     | Added to the prepared plates | 1% DMSO                                  |                                                  |           |                                                                            |           |      |
| Pterostilbene                     | <chem>COC1=CC(=CC(=C1)/C=C/C2=CC(=C(C=C2)O)OC</chem> | 100 µM <sup>70</sup>                                | Antioxidative capacity      | Measurement of dichlorofluorescein fluorescence during incubation at 37 °C | No effect               | n.d.           | N2                    | L4           | Heat-inactivated OP50        | Liquid NGM                               | Diluted in liquid                                | 0.1% DMSO |                                                                            |           |      |
| trans-4'-hydroxy-3,4,5-           | <chem>FC1=C(F)C(F)=CC(/C=C/C2=CC=C(O)C=C2)=C1</chem> | 100 µM <sup>70</sup>                                | Antioxidative capacity      | Measurement of dichlorofluorescein fluorescence during incubation at 37 °C | No effect               | n.d.           | N2                    | L4           | Heat-inactivated OP50        | Liquid NGM                               | Diluted in liquid                                | 0.1% DMSO |                                                                            |           |      |

|                                                  |                                                       |                                 |                         |                                                                            |           |                        |    |    |                       |            |                   |           |
|--------------------------------------------------|-------------------------------------------------------|---------------------------------|-------------------------|----------------------------------------------------------------------------|-----------|------------------------|----|----|-----------------------|------------|-------------------|-----------|
| trifluorostilbene                                |                                                       |                                 |                         |                                                                            |           |                        |    |    |                       |            |                   |           |
| trans-2,5-dimethoxy-4'-hydroxystilbene           | <chem>OC(C=C1)=CC=C1/C=C/C2=CC(OC)=C(C(OC)=C2)</chem> | 100 $\mu\text{M}$ <sup>70</sup> | Antioxidative capacity  | Measurement of dichlorofluorescein fluorescence during incubation at 37 °C | No effect | n.d.                   | N2 | L4 | Heat-inactivated OP50 | Liquid NGM | Diluted in liquid | 0.1% DMSO |
| trans-3, 5-dimethoxy-4-fluoro-4'-hydroxystilbene | <chem>FC1=C(C=C(/C=C/C2=CC=C(O)C=C2)C=C1OC)OC</chem>  | 100 $\mu\text{M}$ <sup>70</sup> | Lifespan                | Mean and maximum lifespan                                                  | Improved  | skn-1, daf-16, sir-2.1 | N2 | L4 | Heat-inactivated OP50 | Liquid NGM | Diluted in liquid | 0.1% DMSO |
|                                                  |                                                       |                                 | Locomotion              | Motility classes                                                           | Improved  |                        |    |    |                       |            |                   |           |
|                                                  |                                                       |                                 | Antioxidative capacity  | Measurement of dichlorofluorescein fluorescence during incubation at 37 °C | Improved  |                        |    |    |                       |            |                   |           |
|                                                  |                                                       |                                 | Thermal stress survival | Induced with 37 °C                                                         | No effect |                        |    |    |                       |            |                   |           |
|                                                  |                                                       |                                 | Nuclear translocation   | DAF-16::GFP                                                                | No effect |                        |    |    |                       |            |                   |           |
|                                                  | SKN-1::GFP                                            | No effect                       |                         |                                                                            |           |                        |    |    |                       |            |                   |           |
| trans-2,4',5-trihydroxystilbene                  | <chem>OC1=CC(/C=C/C2=CC=C(O)C=C2)=C(O)C=C1</chem>     | 100 $\mu\text{M}$ <sup>70</sup> | Lifespan                | Mean and maximum lifespan                                                  | Improved  | skn-1, daf-16, sir-2.1 | N2 | L4 | Heat-inactivated OP50 | Liquid NGM | Diluted in liquid | 0.1% DMSO |
|                                                  |                                                       |                                 | Locomotion              | Motility classes                                                           | Improved  |                        |    |    |                       |            |                   |           |
|                                                  |                                                       |                                 | Antioxidative capacity  | Measurement of dichlorofluorescein fluorescence during incubation at 37 °C | Improved  |                        |    |    |                       |            |                   |           |
|                                                  |                                                       |                                 | Thermal stress survival | Induced with 37 °C                                                         | No effect |                        |    |    |                       |            |                   |           |
|                                                  |                                                       |                                 | Nuclear translocation   | DAF-16::GFP                                                                | No effect |                        |    |    |                       |            |                   |           |
|                                                  | SKN-1::GFP                                            | No effect                       |                         |                                                                            |           |                        |    |    |                       |            |                   |           |

Table SI 9. Lignans

| Compound    | Structure (Smiles)                                                                | Dose [Ref]                                                        | Experiment              | Parameters                                                                                                | Effect    | Involved Genes | Strain | Treat. Start | Food | Media    | Treatment application      | Vector  |
|-------------|-----------------------------------------------------------------------------------|-------------------------------------------------------------------|-------------------------|-----------------------------------------------------------------------------------------------------------|-----------|----------------|--------|--------------|------|----------|----------------------------|---------|
| Pinoresinol | <chem>COC1=C(C=CC(=C1)[C@@H]2[C@H]3CO[C@@H]([C@H]3CO2)C4=CC(=C(C=C4)O)OC)O</chem> | 2 $\mu\text{g}/\text{ml}$ $\cong$ 5.9 $\mu\text{M}$ <sup>60</sup> | Lifespan                | Mean lifespan                                                                                             | No effect | n.d.           | N2     | L4           | OP50 | NGM agar | Added to agar and bacteria | 0.05%   |
|             |                                                                                   |                                                                   | Locomotion              | Wave initiation rate, activity index, brush stroke and body wave number                                   | No effect |                |        |              |      |          |                            |         |
|             |                                                                                   |                                                                   | Thermal stress survival | Induced with 37°C                                                                                         | Improved  |                |        |              |      |          |                            |         |
| Sesamin     | <chem>C1[C@H]2[C@H](CO[C@@H]2C3=C4C=C(C=C3)OC4O)[C@H](O1)C5=CC6=C(C=C5)OC6</chem> | 28, 28, 56 and 300 $\mu\text{M}$ <sup>54</sup>                    | Proteotoxicity          | Paralysis assay with temperature-dependent amyloid beta expression in muscles                             | Improved  | mtl-2          | CL2659 | L3           | OP50 | S medium | Diluted in liquid          | 1% DMSO |
|             |                                                                                   |                                                                   |                         | Quantification of YFP tagged $\alpha$ -synuclein expression in muscles by microscopy and image processing | Improved  |                | NL5901 | L4           |      |          |                            |         |

Table SI 10. Polyketides

| Compound                                                 | Structure (Smiles)                                                                                      | Dose [Ref]                                | Experiment                                                     | Parameters                                                                                                                      | Effect    | Involved Genes                               | Strain   | Treat. Start | Food                  | Media      | Treatment application     | Vector                     |                       |
|----------------------------------------------------------|---------------------------------------------------------------------------------------------------------|-------------------------------------------|----------------------------------------------------------------|---------------------------------------------------------------------------------------------------------------------------------|-----------|----------------------------------------------|----------|--------------|-----------------------|------------|---------------------------|----------------------------|-----------------------|
| Emodin                                                   | <chem>CC1=CC2=C(C(=C1)O)C(=O)C3=C(C2=O)C=C(C=C3O)O</chem>                                               | 3.7, 37, 74 and 400 $\mu$ M <sup>54</sup> | Lifespan                                                       | Survival on day 18 compared to control                                                                                          | Improved  | mtl-2                                        | N2       | L4           | OP50                  | S medium   | Diluted in liquid         | 1% DMSO                    |                       |
|                                                          |                                                                                                         |                                           | Proteotoxicity                                                 | Paralysis assay with temperature-dependent amyloid beta expression in muscles                                                   | Improved  |                                              | CL2659   | L3           |                       |            |                           |                            |                       |
|                                                          |                                                                                                         |                                           | Proteotoxicity                                                 | Quantification of YFP tagged $\alpha$ -synuclein expression in muscles by microscopy and image processing                       | Improved  |                                              | NL5901   | L4           |                       |            |                           |                            |                       |
|                                                          |                                                                                                         | 0, 50, 150, and 300 $\mu$ M <sup>75</sup> | Lifespan elongation                                            | Mean lifespan                                                                                                                   | Improved  | daf-16                                       | N2       | L4           | Heat-inactivated OP50 | NGM agar   | Mixed with OP50           | 0.01% DMSO                 |                       |
|                                                          |                                                                                                         |                                           | ROS stress survival                                            | Induced with 30 mM of paraquat                                                                                                  | Improved  |                                              |          |              |                       |            |                           |                            |                       |
|                                                          |                                                                                                         |                                           | Antioxidant capacity                                           | Measurement of dichlorofluorescein fluorescence during incubation at 37 °C                                                      | Improved  |                                              |          |              |                       |            |                           |                            |                       |
|                                                          |                                                                                                         |                                           | Thermal stress survival                                        | Induced with 37 °C                                                                                                              | Improved  |                                              |          |              |                       |            |                           |                            |                       |
|                                                          |                                                                                                         |                                           | Nuclear translocation                                          | DAF-16::GFP                                                                                                                     | Improved  |                                              |          |              |                       |            |                           |                            | TJ356                 |
|                                                          |                                                                                                         |                                           |                                                                | SKN-1::GFP                                                                                                                      | No effect |                                              | LD1      |              |                       |            |                           |                            |                       |
|                                                          |                                                                                                         | Cannabidiol                               | <chem>Oc1c(c(O)cc(c1)CC(C)C)C@H]2\C=C/C(C)C@H]2\C=C(C)C</chem> | 5 $\mu$ M <sup>76</sup>                                                                                                         | Lifespan  | Mean lifespan                                | Improved | n.d.         | CL2122                | L1         | OP50                      | NGM agar                   | Diluted in OP50 stock |
|                                                          |                                                                                                         |                                           |                                                                |                                                                                                                                 | Improved  | CL2355                                       |          |              |                       |            |                           |                            |                       |
| Locomotion                                               | Exploration assay; scored how many squares of a petri dish grid are entered by the worms                |                                           |                                                                |                                                                                                                                 | No effect | CL2122                                       |          |              |                       |            |                           |                            |                       |
|                                                          |                                                                                                         |                                           |                                                                |                                                                                                                                 | Improved  | CL2355                                       |          |              |                       |            |                           |                            |                       |
| Pharyngeal Pumping                                       | Pumping rate                                                                                            |                                           |                                                                |                                                                                                                                 | No effect | CL2122                                       |          |              |                       |            |                           |                            |                       |
|                                                          |                                                                                                         |                                           |                                                                | Improved                                                                                                                        | CL2355    |                                              |          |              |                       |            |                           |                            |                       |
| 0.4, 4, 10, 40, 100, 400 $\mu$ M, and 4 mM <sup>77</sup> | Lifespan                                                                                                |                                           |                                                                | Mean and maximum lifespan                                                                                                       | Improved  | n.d.                                         | N2       | A            | OP50                  | Liquid NGM | Added to NGM              | 0.2% DMSO                  |                       |
|                                                          | Locomotion                                                                                              |                                           |                                                                | Flow Cell recording; displacement of individual animals from the rectangular area (bounding box) that encloses their whole body | Improved  | n.d.                                         |          |              |                       |            |                           |                            |                       |
|                                                          | Thermal stress survival                                                                                 |                                           |                                                                | Induced with 37 °C                                                                                                              | Improved  | n.d.                                         |          |              |                       |            |                           |                            |                       |
| 5% <sup>78</sup>                                         | ROS levels                                                                                              |                                           |                                                                | Measurement of dichlorofluorescein fluorescence                                                                                 | Improved  | n.d.                                         | N2       | L4           | OP50                  | NGM agar   | n.d.                      | ultrapure olive oil        |                       |
|                                                          | Proteotoxicity                                                                                          |                                           |                                                                | Paralysis assay with temperature-dependent amyloid beta expression in muscles                                                   | Improved  |                                              | GMC101   |              |                       |            |                           |                            |                       |
| 1, 5 and 10 $\mu$ M <sup>79</sup>                        | Lifespan                                                                                                |                                           |                                                                | n.d.                                                                                                                            | Improved  | <i>bec-1, vps-34, sqst-1, sir-2.1, aak-2</i> | N2       | L1           | OP50                  | NGM agar   | Diluted in autoclaved NGM | n.d. concentration of DMSO |                       |
|                                                          | Pharyngeal pumping                                                                                      |                                           |                                                                | Pumping rate                                                                                                                    | Improved  |                                              |          |              |                       |            |                           |                            |                       |
|                                                          | Autophagy                                                                                               |                                           |                                                                | GFP::LGG-1 marked autophagic vesicles were counted in body-wall muscle, proximal intestinal cells, and terminal pharyngeal bulb | Improved  |                                              |          |              |                       |            |                           |                            | DA2123                |
|                                                          |                                                                                                         |                                           |                                                                | GFP::LGG-1 marked autophagic vesicles were counted in nerve-ring neurons                                                        | Improved  |                                              |          |              |                       |            |                           |                            | MAH242                |
| (-)-trans- $\Delta$ 9-Tetrahydrocannabinol               | <chem>CCCCc1cc(c2c(c1)O)C([C@H]3[C@H]2C=C(CC3)C)(C)CO</chem>                                            | 2.5% <sup>78</sup>                        | ROS levels                                                     | Measurement of dichlorofluorescein fluorescence                                                                                 | Improved  | n.d.                                         | N2       | L4           | OP50                  | NGM agar   | n.d.                      | ultrapure olive oil        |                       |
|                                                          |                                                                                                         |                                           | Proteotoxicity                                                 | Paralysis assay with temperature-dependent amyloid beta expression in muscles                                                   | No effect |                                              | GMC101   |              |                       |            |                           |                            |                       |
| Tetracycline                                             | <chem>C[C@]1(c2cccc(c2)C(=O)C3=C([C@]4([C@@H]([C@]([C@@H]3)1)[C@@H](C=C(C4=O)C(=O)N)O)N(C)CO)O)O</chem> | 50 $\mu$ M <sup>80</sup>                  | Proteotoxicity                                                 | Paralysis assay with constitutive amyloid beta expression in muscles                                                            | Improved  | n.d.                                         | CL2006   | L3           | OP50                  | NGM agar   | n.d.                      | 0% DMSO                    |                       |
|                                                          |                                                                                                         |                                           |                                                                | Paralysis assay with temperature-dependent amyloid beta expression in muscles                                                   | Improved  |                                              | CL4176   |              |                       |            |                           |                            |                       |

Table SI 11. Betalaine

| Compound                            | Structure (Smiles)                                                                    | Dose [Ref]                          | Experiment                          | Parameters                                                        | Effect                                                            | Involved Genes | Strain | Treat. Start | Food                  | Media                      | Treatment application      | Vector            |
|-------------------------------------|---------------------------------------------------------------------------------------|-------------------------------------|-------------------------------------|-------------------------------------------------------------------|-------------------------------------------------------------------|----------------|--------|--------------|-----------------------|----------------------------|----------------------------|-------------------|
| Aniline-betaxanthin                 | <chem>O=C([O-])C1=C/C(C[C@@H](C([O-]))=O)N1)=C/C=N/C2=CC=CC=C2</chem>                 | 25 μM <sup>81</sup>                 | Lifespan                            | Mean lifespan after 2 d of treatment measured by lifespan machine | No effect                                                         | n.d.           | N2     | L1           | Heat-inactivated OP50 | Liquid M9/S medium mixture | Diluted in liquid          | 0% DMSO           |
| Betanidin                           | <chem>C1[C@H](N=C(C=C1/C=C/N2[C@@H](CC3=CC(=C(C=C3)2)O)O)C(=O)O)C(=O)O)C(=O)O</chem>  | 25 μM <sup>81</sup>                 | Lifespan                            | Mean lifespan after 2 d of treatment measured by lifespan machine | No effect                                                         | n.d.           | N2     | L1           | Heat-inactivated OP50 | Liquid M9/S medium mixture | Diluted in liquid          | 0% DMSO           |
| Betanin                             | <chem>C1[C@@H](N=C(C=C1/C=C/N2[C@@H](CC3=CC(=C(C=C3)2)O)O)C(=O)O)C(=O)O)C(=O)O</chem> | 25 μM <sup>81</sup>                 | Lifespan                            | Mean lifespan after 2 d of treatment measured by lifespan machine | No effect                                                         | n.d.           | N2     | L1           | Heat-inactivated OP50 | Liquid M9/S medium mixture | Diluted in liquid          | 0% DMSO           |
|                                     |                                                                                       |                                     | 10, 25, 50 and 100 μM <sup>82</sup> | Lifespan                                                          | Mean lifespan after 2 d of treatment measured by lifespan machine | No effect      | n.d.   | N2           | L1                    | Heat-inactivated OP50      | Liquid M9/S medium mixture | Diluted in liquid |
| Dopaxanthin                         | <chem>C/C=N/[C@@H](CC1=CC(O)=C(O)C=C1)C(O)=O)C\2/C[C@@H](C(O)=O)NC(C(O)=O)=C2</chem>  | 25 μM <sup>81</sup>                 | Lifespan                            | Mean lifespan after 2 d of treatment measured by lifespan machine | Improved                                                          | daf-16         | N2     | L1           | Heat-inactivated OP50 | Liquid M9/S medium mixture | Diluted in liquid          | 0% DMSO           |
|                                     |                                                                                       |                                     | Nuclear translocation               | DAF-16::GFP                                                       | Improved                                                          | TJ356          |        |              |                       |                            |                            |                   |
| Indicaxanthin                       | <chem>C=CC=1C[C@@H](C(O)=O)N=C(C(O)=O)C1)N2[C@H](C(O)=O)CCC2</chem>                   | 25 μM <sup>81</sup>                 | Lifespan                            | Mean lifespan after 2 d of treatment measured by lifespan machine | Improved                                                          | daf-16         | N2     | L1           | Heat-inactivated OP50 | Liquid M9/S medium mixture | Diluted in liquid          | 0% DMSO           |
|                                     |                                                                                       |                                     | 10, 25, 50 and 100 μM <sup>82</sup> | Nuclear translocation                                             | DAF-16::GFP                                                       | Improved       | TJ356  |              |                       |                            |                            |                   |
|                                     |                                                                                       |                                     |                                     |                                                                   | SKN-1::GFP                                                        | No effect      | LD001  |              |                       |                            |                            |                   |
| Indoline carboxylic acid-betacyanin | <chem>O=C([O-])C1=C/C(C[C@@H](C([O-]))=O)N1)=C/C=[N+]2C(C=CC=C3)=C3C=C\2C(O)=O</chem> | 25 μM <sup>81</sup>                 | Lifespan                            | Mean lifespan after 2 d of treatment measured by lifespan machine | Improved                                                          | daf-16, skn-1  | N2     | L1           | Heat-inactivated OP50 | Liquid M9/S medium mixture | Diluted in liquid          | 0% DMSO           |
|                                     |                                                                                       |                                     | Nuclear translocation               | DAF-16::GFP                                                       | Improved                                                          | TJ356          |        |              |                       |                            |                            |                   |
|                                     |                                                                                       |                                     |                                     | SKN-1::GFP                                                        | Improved                                                          | LD001          |        |              |                       |                            |                            |                   |
| Indoline betacyanin                 | <chem>O=C([O-])C1=C/C(C[C@@H](C([O-]))=O)N1)=C/C=[N+]2C(C=CC=C3)=C3C=C\2</chem>       | 10, 25, 50 and 100 μM <sup>82</sup> | Lifespan                            | Mean lifespan after 2 d of treatment measured by lifespan machine | Improved                                                          | n.d.           | N2     | L1           | Heat-inactivated OP50 | Liquid M9/S medium mixture | Diluted in liquid          | 0% DMSO           |
| Miraxanthin I                       | <chem>C(C=N[C@@H](CC(S(C)=O)C(O)=O)=C1CC(C(O)=O)NC(C(O)=O)=C1</chem>                  | 25 μM <sup>81</sup>                 | Lifespan                            | Mean lifespan after 2 d of treatment measured by lifespan machine | Improved                                                          | n.d.           | N2     | L1           | Heat-inactivated OP50 | Liquid M9/S medium mixture | Diluted in liquid          | 0% DMSO           |
| Phenylalanine-                      | <chem>O=C([O-</chem>                                                                  | 25 μM <sup>81</sup>                 | Lifespan                            | Mean lifespan after 2 d of treatment measured                     | Improved                                                          | daf-16         | N2     | L1           | Heat-inactivated      | Liquid                     | Diluted in liquid          | 0% DMSO           |

|                                     |                                                                                     |                                                |                       |                                                                   |           |      |       |    |                       |                            |                   |         |
|-------------------------------------|-------------------------------------------------------------------------------------|------------------------------------------------|-----------------------|-------------------------------------------------------------------|-----------|------|-------|----|-----------------------|----------------------------|-------------------|---------|
| <b>betaxanthin</b>                  | <chem>O=C([O-])C1=C/C(C[C@@H](C([O-])=O)N1)=C/C=N\C(C(O)=O)CC2=CC=CC=C2</chem>      |                                                |                       | by lifespan machine                                               |           |      |       |    | OP50                  | M9/S medium mixture        |                   |         |
|                                     |                                                                                     |                                                | Nuclear translocation | DAF-16::GFP                                                       | Improved  |      | TJ356 |    |                       |                            |                   |         |
| <b>Phenylethylamine-betaxanthin</b> | <chem>O=C([O-])C1=C/C(C[C@@H](C([O-])=O)N1)=C/C=N\C(C(O)=O)CC2=CC=CC=C2</chem>      | 10, 25, 50 and 100 $\mu\text{M}$ <sup>82</sup> | Lifespan              | Mean lifespan after 2 d of treatment measured by lifespan machine | Improved  | n.d. | N2    | L1 | Heat-inactivated OP50 | Liquid M9/S medium mixture | Diluted in liquid | 0% DMSO |
| <b>Pyrrrolidine-betaxanthin</b>     | <chem>O=C([O-])C1=C/C(C[C@@H](C([O-])=O)N1)=C/C=[N+]2CCCC/2</chem>                  | 25 $\mu\text{M}$ <sup>81</sup>                 | Lifespan              | Mean lifespan after 2 d of treatment measured by lifespan machine | Improved  | n.d. | N2    | L1 | Heat-inactivated OP50 | Liquid M9/S medium mixture | Diluted in liquid | 0% DMSO |
| <b>Tryptophan-betaxanthin</b>       | <chem>O=C([O-])C1=C/C(C[C@@H](C([O-])=O)N1)=C/C=NC(C(O)=O)CC2=CNC3=C2C=CC=C3</chem> | 25 $\mu\text{M}$ <sup>81</sup>                 | Lifespan              | Mean lifespan after 2 d of treatment measured by lifespan machine | No effect | n.d. | N2    | L1 | Heat-inactivated OP50 | Liquid M9/S medium mixture | Diluted in liquid | 0% DMSO |
| <b>Valine-betaxanthin</b>           | <chem>O=C([O-])C1=C/C(C[C@@H](C([O-])=O)N1)=C/C=NC(C(O)=O)C(C)C</chem>              | 25 $\mu\text{M}$ <sup>81</sup>                 | Lifespan              | Mean lifespan after 2 d of treatment measured by lifespan machine | No effect | n.d. | N2    | L1 | Heat-inactivated OP50 | Liquid M9/S medium mixture | Diluted in liquid | 0% DMSO |
| <b>Vulgaxanthin I</b>               | <chem>C\C=C\N[C@@H](C(C(N)=O)C(O)=O)=C/1\C[C@@H](C(O)=O)NC(C(O)=O)=C1</chem>        | 25 $\mu\text{M}$ <sup>81</sup>                 | Lifespan              | Mean lifespan after 2 d of treatment measured by lifespan machine | Improved  | n.d. | N2    | L1 | Heat-inactivated OP50 | Liquid M9/S medium mixture | Diluted in liquid | 0% DMSO |
| <b>Vulgaxanthin II</b>              | <chem>C\C=C\N[C@@H](C(C(N)=O)C(O)=O)=C/1\C[C@@H](C(O)=O)NC(C(O)=O)=C1</chem>        | 25 $\mu\text{M}$ <sup>81</sup>                 | Lifespan              | Mean lifespan after 2 d of treatment measured by lifespan machine | Improved  | n.d. | N2    | L1 | Heat-inactivated OP50 | Liquid M9/S medium mixture | Diluted in liquid | 0% DMSO |
| <b>Vulgaxanthin III</b>             | <chem>C\C=C\N[C@@H](C(C(N)=O)C(O)=O)=C/1\C[C@@H](C(O)=O)NC(C(O)=O)=C1</chem>        | 25 $\mu\text{M}$ <sup>81</sup>                 | Lifespan              | Mean lifespan after 2 d of treatment measured by lifespan machine | No effect | n.d. | N2    | L1 | Heat-inactivated OP50 | Liquid M9/S medium mixture | Diluted in liquid | 0% DMSO |
| <b>Vulgaxanthin IV</b>              | <chem>C\C=C\N[C@@H](C(C(N)=O)C(O)=O)=C/1\C[C@@H](C(O)=O)NC(C(O)=O)=C1</chem>        | 25 $\mu\text{M}$ <sup>81</sup>                 | Lifespan              | Mean lifespan after 2 d of treatment measured by lifespan machine | No effect | n.d. | N2    | L1 | Heat-inactivated OP50 | Liquid M9/S medium mixture | Diluted in liquid | 0% DMSO |

Table SI 12. Amino acids and peptides

| Compound              | Structure (Smiles)       | Dose [Ref]                                                                             | Experiment              | Parameters                       | Effect    | Involved Genes | Strain | Treat. Start | Food                  | Media      | Treatment application                    | Vector         |
|-----------------------|--------------------------|----------------------------------------------------------------------------------------|-------------------------|----------------------------------|-----------|----------------|--------|--------------|-----------------------|------------|------------------------------------------|----------------|
| L-Theanine            | CCNC(=O)CC[C@H](N)C(=O)O | 0.1, 1 and 10 $\mu$ M <sup>83</sup>                                                    | Lifespan                | Mean and maximum lifespan        | Improved  | n.d.           | N2     | L4           | Heat-inactivated OP50 | NGM agar   | n.d.                                     | n.d.           |
|                       |                          |                                                                                        | ROS stress survival     | Induced with 10 mM paraquat      | Improved  |                |        |              |                       |            |                                          |                |
|                       |                          | 50, 100, and 200 $\mu$ g/ml $\triangleq$ 287.0, 574.1 and 1148.1 $\mu$ M <sup>84</sup> | Lifespan                | Mean lifespan                    | No effect |                |        |              |                       |            |                                          |                |
|                       |                          |                                                                                        | ROS stress survival     | Induced with 0.5 mM juglone      | Improved  |                |        |              |                       |            |                                          |                |
|                       |                          |                                                                                        | Thermal stress survival | Induced with 35 °C               | Improved  |                |        |              |                       |            |                                          |                |
| L-Citrulline          | NC(CCCNC(N)=O)C(O)=O     | n.d. <sup>18</sup>                                                                     | ROS stress survival     | Induced with 300 $\mu$ M juglone | Improved  | n.d.           | N2     | L1           | OP50                  | Solid agar | Added to the NGM before OP50 were spread | 0.05–0.1% MeOH |
| Peptide LDRLEETGGAS   |                          | 2 and 4 mM <sup>85</sup>                                                               | ROS stress survival     | Induced with 50 mM paraquat      | Improved  | daf-16         | N2     | A            | NA22                  | S medium   | Diluted in liquid                        | 0% DMSO        |
|                       |                          |                                                                                        | Nuclear translocation   | DAF-16::GFP                      | Improved  |                | GR1352 | L3           |                       |            |                                          |                |
| Peptide KEGCREPETEKGR |                          | 2 and 4 mM <sup>85</sup>                                                               | ROS stress survival     | Induced with 50 mM paraquat      | Improved  | daf-16         | N2     | A            | NA22                  | S medium   | Diluted in liquid                        | 0% DMSO        |
|                       |                          |                                                                                        | Nuclear translocation   | DAF-16::GFP                      | Improved  |                | GR1352 | L3           |                       |            |                                          |                |
| Peptide IVTNWDDMEK    |                          | 2 and 4 mM <sup>85</sup>                                                               | ROS stress survival     | Induced with 50 mM paraquat      | Improved  | daf-16         | N2     | A            | NA22                  | S medium   | Diluted in liquid                        | 0% DMSO        |
|                       |                          |                                                                                        | Nuclear translocation   | DAF-16::GFP                      | Improved  |                | GR1352 | L3           |                       |            |                                          |                |

Table SI 13. Macrolides

| Compound  | Structure (Smiles)                                                                                                                                                                      | Dose [Ref]                | Experiment | Parameters                | Effect   | Involved Genes | Strain | Treat. Start | Food | Media    | Treatment application | Vector                     |
|-----------|-----------------------------------------------------------------------------------------------------------------------------------------------------------------------------------------|---------------------------|------------|---------------------------|----------|----------------|--------|--------------|------|----------|-----------------------|----------------------------|
| Rapamycin | O[C@@H]1CC[C@@H](C[C@H]1OC)C[C@@H](C)[C@@H]4CC(=O)[C@H](C)/C=C\C[C@@H](O)[C@@H](OC)(=O)[C@H](C)C[C@@H](C)C=C\C=C/C[C@@H](OC)[C@@H]2CC[C@@H](C)[C@@](O)(O2)C(=O)C(=O)N3CCCC[C@H]3C(=O)O4 | 100 $\mu$ M <sup>86</sup> | Lifespan   | Maximum and mean lifespan | Improved | n.d.           | N2     | L4           | n.d. | NGM agar | n.d.                  | n.d. concentration of DMSO |

Table SI 14. Terpenes

| Compound                 | Structure (Smiles)                                                                                                     | Dose [Ref]                                         | Experiment             | Parameters                                                                                         | Effect   | Involved Genes | Strain | Treat. Start | Food                | Media    | Treatment application  | Vector    |
|--------------------------|------------------------------------------------------------------------------------------------------------------------|----------------------------------------------------|------------------------|----------------------------------------------------------------------------------------------------|----------|----------------|--------|--------------|---------------------|----------|------------------------|-----------|
| Limonene                 | CC1=CCC(CC1)C=C                                                                                                        | 5, 25 and 50 $\mu$ M <sup>87</sup>                 | Lifespan               | Mean lifespan                                                                                      | Improved | n.d.           | N2     | L1           | OP50                | NGM agar | Added to the OP50 lawn | 0.1% DMSO |
|                          |                                                                                                                        |                                                    |                        |                                                                                                    | Improved |                |        |              |                     |          |                        |           |
|                          |                                                                                                                        |                                                    | ROS stress survival    | Induced with paraquat                                                                              | Improved |                |        |              |                     |          |                        |           |
|                          |                                                                                                                        |                                                    | Antioxidative capacity | Measurement of intracellular dichlorofluorescein fluorescence after incubation at 37 °C            | Improved |                |        |              |                     |          |                        |           |
|                          |                                                                                                                        |                                                    | Nuclear translocation  | DAF-16::GFP                                                                                        | Improved |                |        |              |                     |          |                        |           |
| Aucubin                  | C1=CO[C@H]([C@H]2[C@@H]1[C@@H](C=C2CO)O)[C@H]3[C@@H]([C@H]([C@@H]([C@H](O3)CO)O)O)O                                    | 100 $\mu$ M <sup>24</sup>                          | Lifespan               | Mean and Median Lifespan                                                                           | Improved | daf-16, mev-1  | N2     | L4           | UV inactivated OP50 | NGM agar | Pipetted onto NGM      | n.d.      |
| Geniposide               | COC(=O)C1=CO[C@H]([C@H]2[C@@H]1CC=C2CO)O[C@H]3[C@@H]([C@H]([C@@H]([C@H](O3)CO)O)O)O                                    | 100 $\mu$ M <sup>24</sup>                          | Lifespan               | Mean and Median Lifespan                                                                           | Improved | daf-16, mev-1  | N2     | L4           | UV inactivated OP50 | NGM agar | Pipetted onto NGM      | n.d.      |
| Geniposidic acid         | C1C=C([C@H]2[C@H]1C(=CO[C@H]2O)[C@H]3[C@@H]([C@H]([C@@H]([C@H](O3)CO)O)O)C(=O)O)CO                                     | 100 $\mu$ M <sup>24</sup>                          | Lifespan               | Mean and Median Lifespan                                                                           | Improved | n.d.           | N2     | L4           | UV inactivated OP50 | NGM agar | Pipetted onto NGM      | n.d.      |
| Asperuloside             | CC(=O)OCC1=C[C@H]2[C@H]3[C@@H]1[C@@H](OC=C3C(=O)O2)O[C@H]4[C@@H]([C@H]([C@@H]([C@H](O4)CO)O)O)O                        | 100 $\mu$ M <sup>24</sup>                          | Lifespan               | Mean and Median Lifespan                                                                           | Improved | daf-16, mev-1  | N2     | L4           | UV inactivated OP50 | NGM agar | Pipetted onto NGM      | n.d.      |
| 4-Hydroxy-E-globularinin | C(OC/C=C/C1=CC(=C(O)C=C1)=O)[C@]2(O)[C@@]3([C@]([C@H](O)[C@@H]2O)(C=CO[C@H]3O[C@@H]4O[C@H](CO)[C@@H](O)[C@H]4O)[H])[H] | 2, 20 and 200 $\mu$ M <sup>88</sup>                | Lifespan               | Mean lifespan                                                                                      | Improved | daf-16         | N2     | L1           | OP50                | NGM agar | Added to NGM and OP50  | 0% DMSO   |
|                          |                                                                                                                        |                                                    | Pharyngeal pumping     | Pumping rate                                                                                       | Improved |                |        |              |                     |          |                        |           |
|                          |                                                                                                                        |                                                    | ROS stress survival    | Induced with 10 mM paraquat                                                                        | Improved |                |        |              |                     |          |                        |           |
|                          |                                                                                                                        |                                                    | ROS levels             | Measurement of dichlorofluorescein fluorescence                                                    | Improved |                |        |              |                     |          |                        |           |
|                          |                                                                                                                        |                                                    | Nuclear translocation  | DAF-16::GFP                                                                                        | Improved |                |        |              |                     |          |                        |           |
| Oleuropein               | O=C(OCCc1ccc(O)c(O)c1)C[C@H]2C(                                                                                        | 500 $\mu$ g/ml $\cong$ 925.1 $\mu$ M <sup>16</sup> | Locomotion             | Wave initiation rate, body wave number and activity index of muscle $\alpha$ -synuclein expressing | Improved | n.d.           | OW13   | L4           | n.d.                | n.d.     | n.d.                   | n.d.      |

|                                                                               |                                                                                                                              |                                                      |                         |                                                                                                     |                                                                                                           |                                                                      |           |                      |       |                   |           |                            |      |                                 |        |    |
|-------------------------------------------------------------------------------|------------------------------------------------------------------------------------------------------------------------------|------------------------------------------------------|-------------------------|-----------------------------------------------------------------------------------------------------|-----------------------------------------------------------------------------------------------------------|----------------------------------------------------------------------|-----------|----------------------|-------|-------------------|-----------|----------------------------|------|---------------------------------|--------|----|
|                                                                               | =C/C)\[C@@H](O)C=C2\C(=O)OC)O[C@@H]3O[C@@H]([C@@H](O)[C@@H](O)[C@@H]3)CO                                                     |                                                      |                         | worms                                                                                               |                                                                                                           |                                                                      | N2        |                      |       |                   |           |                            |      |                                 |        |    |
|                                                                               |                                                                                                                              |                                                      |                         | Wave initiation rate, body wave number and activity index of worms treated with 10 $\mu$ M rotenone | Improved                                                                                                  |                                                                      |           |                      |       |                   |           |                            |      |                                 |        |    |
|                                                                               |                                                                                                                              |                                                      | Thermal stress survival | Induced with 37 °C                                                                                  | Improved                                                                                                  |                                                                      |           |                      |       |                   |           |                            |      |                                 |        |    |
|                                                                               |                                                                                                                              |                                                      |                         | Proteotoxicity                                                                                      | Quantification of YFP tagged $\alpha$ -synuclein expression in muscles by microscopy and image processing | Improved                                                             |           | OW13                 |       |                   |           |                            |      |                                 |        |    |
|                                                                               |                                                                                                                              | 40, 180, 440 $\mu$ M <sup>73</sup>                   |                         |                                                                                                     | Lifespan                                                                                                  | Mean lifespan                                                        | Improved  | daf-16, skn-1, hsf-1 | N2    | L1                | n.d.      | NGM agar                   | n.d. | n.d. concentration of DMSO n.d. |        |    |
|                                                                               |                                                                                                                              |                                                      |                         |                                                                                                     | ROS stress survival                                                                                       | Induced with 10 mM paraquart                                         | Improved  |                      |       |                   |           |                            |      |                                 |        |    |
|                                                                               |                                                                                                                              |                                                      |                         |                                                                                                     | Thermal stress survival                                                                                   | Induced with 35 °C                                                   | Improved  |                      |       |                   |           |                            |      |                                 |        |    |
|                                                                               |                                                                                                                              |                                                      |                         |                                                                                                     | Nuclear translocation                                                                                     | DAF-16::GFP                                                          | Improved  |                      |       |                   |           |                            |      |                                 | TJ356  |    |
|                                                                               |                                                                                                                              | 12.5–500 $\mu$ M <sup>80</sup>                       |                         |                                                                                                     | Lifespan                                                                                                  | Median lifespan                                                      | No effect | n.d.                 | CL806 | L2                | OP50      | NGM agar                   | n.d. | n.d. concentration of DMSO      |        |    |
|                                                                               |                                                                                                                              |                                                      |                         |                                                                                                     |                                                                                                           |                                                                      | Improved  |                      |       |                   |           |                            |      |                                 |        |    |
|                                                                               |                                                                                                                              |                                                      |                         |                                                                                                     | Proteotoxicity                                                                                            | Paralysis assay with constitutive amyloid beta expression in muscles | Improved  |                      |       |                   |           |                            |      |                                 | CL2006 | L1 |
|                                                                               |                                                                                                                              |                                                      |                         |                                                                                                     |                                                                                                           |                                                                      |           |                      |       |                   |           |                            |      |                                 |        | L2 |
| Paralysis assay with temperature-dependent amyloid beta expression in muscles | Improved                                                                                                                     |                                                      |                         |                                                                                                     | CL4176                                                                                                    | L1                                                                   |           |                      |       |                   |           |                            |      |                                 |        |    |
|                                                                               | No effect                                                                                                                    |                                                      |                         |                                                                                                     |                                                                                                           | L2                                                                   |           |                      |       |                   |           |                            |      |                                 |        |    |
|                                                                               |                                                                                                                              |                                                      | L3                      |                                                                                                     |                                                                                                           |                                                                      |           |                      |       |                   |           |                            |      |                                 |        |    |
| <b><math>\beta</math>-caryophyllene</b>                                       | C1(=C)\CC=C/C[C@@H]2[C@@H]1CC2(C)C                                                                                           | 25 $\mu$ M, 50 $\mu$ M and 100 $\mu$ M <sup>89</sup> | Lifespan elongation     | Mean lifespan                                                                                       | Improved                                                                                                  | eat-2, sir-2.1 and skn-1                                             | N2        | L1                   | OP50  | Pipetted onto NGM | 0.1% DMSO |                            |      |                                 |        |    |
|                                                                               |                                                                                                                              |                                                      |                         |                                                                                                     | Improved                                                                                                  |                                                                      |           |                      |       |                   |           |                            |      |                                 |        |    |
|                                                                               |                                                                                                                              |                                                      |                         |                                                                                                     | Improved                                                                                                  |                                                                      |           |                      |       |                   |           |                            |      |                                 |        |    |
|                                                                               |                                                                                                                              |                                                      | ROS stress survival     | Induced with paraquart                                                                              | Improved                                                                                                  |                                                                      |           | A                    |       |                   |           |                            |      |                                 |        |    |
|                                                                               |                                                                                                                              |                                                      | Pharyngeal pumping      | Pumping rate                                                                                        | Detrimental                                                                                               |                                                                      |           |                      |       |                   |           |                            |      |                                 |        |    |
|                                                                               |                                                                                                                              |                                                      | Autofluorescence        | Microscopy and image processing (340-380/435-480 nm filter)                                         | Improved                                                                                                  |                                                                      |           | L1                   |       |                   |           |                            |      |                                 |        |    |
|                                                                               |                                                                                                                              |                                                      | ROS stress survival     | Induced with 250 $\mu$ M H <sub>2</sub> O <sub>2</sub>                                              | Improved                                                                                                  |                                                                      |           |                      |       |                   |           |                            |      |                                 |        |    |
|                                                                               |                                                                                                                              |                                                      | ROS levels              | Measurement of intracellular dichlorofluorescein fluorescence                                       | Improved                                                                                                  |                                                                      |           |                      |       |                   |           |                            |      |                                 |        |    |
|                                                                               |                                                                                                                              |                                                      | Thermal stress survival | Induced with 35 °C                                                                                  | Improved                                                                                                  |                                                                      |           |                      |       |                   |           |                            |      |                                 |        |    |
|                                                                               |                                                                                                                              |                                                      | Nuclear translocation   | DAF-16::GFP                                                                                         | Improved                                                                                                  |                                                                      |           | TJ356                |       |                   |           |                            |      |                                 |        |    |
| <b>Celaspermin A</b>                                                          | C[C@@]12[C@@]3([C@@H](OC(C)=O)[C@@](C(C)(C)O3)(COC(C)=O)[C@@H]1OC(=O)C4=CC=C(C=C4)[H])[C@@H](C)[C@@H](OC(C)=O)[C@@H]2OC(C)=O | 50 $\mu$ M <sup>86</sup>                             | Lifespan                | Maximum and mean lifespan                                                                           | Improved                                                                                                  | n.d.                                                                 | N2        | L4                   | n.d.  | NGM agar          | n.d.      | n.d. concentration of DMSO |      |                                 |        |    |
| <b>Celaspermin B</b>                                                          | C[C@@]12[C@@]3([C@@H](OC(=O)C4=CC=CC=C4)[C@@](C(C)(C)O3)(COC(C)=O)[C@@H]1OC(=                                                | 50 $\mu$ M <sup>86</sup>                             | Lifespan                | Maximum and mean lifespan                                                                           | Improved                                                                                                  | n.d.                                                                 | N2        | L4                   | n.d.  | NGM agar          | n.d.      | n.d. concentration of DMSO |      |                                 |        |    |



|                      |                                                                                                                                          |                     |          |                           |          |      |    |    |      |          |      |                            |
|----------------------|------------------------------------------------------------------------------------------------------------------------------------------|---------------------|----------|---------------------------|----------|------|----|----|------|----------|------|----------------------------|
|                      | O)C5=CC=CC=C5)[C@H](C)C[C@@H](OC(C)=O)[C@@H]2OC(C)=O                                                                                     |                     |          |                           |          |      |    |    |      |          |      |                            |
| <b>Celaspermin D</b> | C[C@@]12[C@@]3([C@H](OC(C)=O)[C@](C(C)(C)O3)(C(OC(C)=O)[C@H]1OC(=O)C4=CC=CC=C4)[H]))[C@H](C)C[C@@H](OC(C)=O)[C@@H]2OC(C)=O               | 50 µM <sup>86</sup> | Lifespan | Maximum and mean lifespan | Improved | n.d. | N2 | L4 | n.d. | NGM agar | n.d. | n.d. concentration of DMSO |
| <b>Celaspermin E</b> | C[C@@]12[C@@]3([C@H](OC(C)=O)[C@](C(C)(C)O3)(C(OC(C)=O)[C@H]1OC(=O)C4=CC=CC=C4)[H]))[C@H](C)CC(=O)[C@@H]2OC(C)=O                         | 50 µM <sup>86</sup> | Lifespan | Maximum and mean lifespan | Improved | n.d. | N2 | L4 | n.d. | NGM agar | n.d. | n.d. concentration of DMSO |
| <b>Celaspermin F</b> | C[C@@]12[C@@]3([C@H](OC(C)=O)[C@](C(C)(C)O3)(C[C@@H]1OC(=O)C4=CC=CC=C4)[H]))[C@H](C)C[C@@H](OC(C)=O)[C@@H]2OC(C)=O                       | 50 µM <sup>86</sup> | Lifespan | Maximum and mean lifespan | Improved | n.d. | N2 | L4 | n.d. | NGM agar | n.d. | n.d. concentration of DMSO |
| <b>Celaspermin K</b> | C[C@@]12[C@@]3([C@H](OC(C)=O)[C@](C(C)(C)O3)(C(OC(C)=O)[C@H]1OC(=O)C4=CC=CC=C4)[H]))[C@H](C)C[C@H](OC(/C=C/C5=CC=CC=C5)=O)[C@@H]2OC(C)=O | 50 µM <sup>86</sup> | Lifespan | Maximum and mean lifespan | Improved | n.d. | N2 | L4 | n.d. | NGM agar | n.d. | n.d. concentration of DMSO |
| <b>Celaspermin L</b> | C(OC(C)=O)[C@@]12[C@@]3([C@H](OC(C)=O)[C@@H](OC(C)=O)[C@@H]1OC(=O)C4=CC=C=C4)(C(C)(C)O3)[H]))[C@H](C)C[C@@H](OC(C)=O)[C@@H]2OC(C)=O      | 50 µM <sup>86</sup> | Lifespan | Maximum and mean lifespan | Improved | n.d. | N2 | L4 | n.d. | NGM agar | n.d. | n.d. concentration of DMSO |
| <b>Celaspermin O</b> | C[C@@]12[C@@]3([C@](C(C)(C)O3)([C@H](OC(C)=O)[C@@H]1OC(=O)C4=CC=CC=C4)[H]))[C@H](C)C[C@@H](OC(C)=O)[C@@H]2OC(C)=O                        | 50 µM <sup>86</sup> | Lifespan | Maximum and mean lifespan | Improved | n.d. | N2 | L4 | n.d. | NGM agar | n.d. | n.d. concentration of DMSO |

|                                                                                                                                                            |                                                                                                                             |                          |          |                           |           |      |    |    |      |          |      |                            |
|------------------------------------------------------------------------------------------------------------------------------------------------------------|-----------------------------------------------------------------------------------------------------------------------------|--------------------------|----------|---------------------------|-----------|------|----|----|------|----------|------|----------------------------|
|                                                                                                                                                            | <chem>C@H](C)[C@H](OC(C)=O)[C@H]2OC(C)=O</chem>                                                                             |                          |          |                           |           |      |    |    |      |          |      |                            |
| <b>1<math>\alpha</math>-Hydroxy-6<math>\beta</math>,8<math>\alpha</math>-Diacetoxy-9<math>\alpha</math>-benzyloxy-<math>\beta</math>-dihydroagarofuran</b> | <chem>C[C@@]12[C@]3([C@H](OC(C)=O)[C@H](OC(C)=O)[C@H]1OC(=O)C4=CC=CC=C4)[H])[C@H](C)CC[C@@H]2O</chem>                       | 50 $\mu$ M <sup>86</sup> | Lifespan | Maximum and mean lifespan | Improved  | n.d. | N2 | L4 | n.d. | NGM agar | n.d. | n.d. concentration of DMSO |
| <b>Celaspaculin D</b>                                                                                                                                      | <chem>C(OC(C)=O)[C@@]12[C@]3(C[C@@]([C@H](OC(C)=O)[C@H]1OC(=O)C4=COC4)(C(C)(C)O3)[H])[C@H](C)CC[C@@H]2OC(C)=O</chem>        | 50 $\mu$ M <sup>90</sup> | Lifespan | Mean and maximum lifespan | Improved  | n.d. | N2 | L4 | OP50 | NGM agar | n.d. | n.d. concentration of DMSO |
| <b>Celaspaculin E</b>                                                                                                                                      | <chem>C(OC(C)=O)[C@@]12[C@]3([C@H](OC(C)=O)[C@H](OC(C)=O)[C@H]1OC(=O)C4=COC4)(C(C)(C)O3)[H])[C@H](C)CC[C@@H]2OC(C)=O</chem> | 50 $\mu$ M <sup>90</sup> | Lifespan | Mean and maximum lifespan | Improved  | n.d. | N2 | L4 | OP50 | NGM agar | n.d. | n.d. concentration of DMSO |
| <b>Celaspaculin H</b>                                                                                                                                      | <chem>C(OC(C)=O)[C@@]12[C@]3([C@H](OC(C)=O)[C@H](OC(C)=O)[C@H]1OC(=O)C4=COC4)(C(C)(C)O3)[H])[C@H](C)CC[C@@H]2OC(C)=O</chem> | 50 $\mu$ M <sup>90</sup> | Lifespan | Mean and maximum lifespan | Improved  | n.d. | N2 | L4 | OP50 | NGM agar | n.d. | n.d. concentration of DMSO |
| <b>Celaspaculin J</b>                                                                                                                                      | <chem>C(OC(C)=O)[C@@]12[C@]3([C@H](OC(C)=O)[C@H](OC(C)=O)[C@H]1OC(=O)C4=COC4)(C(C)(C)O3)[H])[C@H](C)CC[C@@H]2OC(C)=O</chem> | 50 $\mu$ M <sup>90</sup> | Lifespan | Mean and maximum lifespan | No effect | n.d. | N2 | L4 | OP50 | NGM agar | n.d. | n.d. concentration of DMSO |
| <b>Celaspaculin K</b>                                                                                                                                      | <chem>C(O)[C@@]12[C@]3(C[C@@]([C@H](OC(C)=O)[C@H]1OC(=O)C4=COC4)(C(C)(C)O3)[H])[C@H](C)CC[C@@H]2OC(C)=O</chem>              | 50 $\mu$ M <sup>90</sup> | Lifespan | Mean and maximum lifespan | No effect | n.d. | N2 | L4 | OP50 | NGM agar | n.d. | n.d. concentration of DMSO |
| <b>Celaspaculin L</b>                                                                                                                                      | <chem>C(OC(C)=O)[C@@]12[C@]3(C[C@@]([C@H](OC(C)=O)[</chem>                                                                  | 50 $\mu$ M <sup>90</sup> | Lifespan | Mean and maximum lifespan | No effect | n.d. | N2 | L4 | OP50 | NGM agar | n.d. | n.d. concentration of      |

|                                                                             |                                                                                                                                                 |                               |                         |                                                                               |          |      |        |       |      |          |                   |                            |
|-----------------------------------------------------------------------------|-------------------------------------------------------------------------------------------------------------------------------------------------|-------------------------------|-------------------------|-------------------------------------------------------------------------------|----------|------|--------|-------|------|----------|-------------------|----------------------------|
|                                                                             | <chem>C@@H]1OC(=O)C=4C=COC4)(C(C)(C)O3)[H]][C@H](C)C[C@@H](OC(C)=O)[C@@H]2OC(C)=O</chem>                                                        |                               |                         |                                                                               |          |      |        |       |      |          |                   | DMSO                       |
| <b>Celaspaculin M</b>                                                       | <chem>C(OC(C)=O)[C@@]12[C@@]3([C@H](OC(C)=O)[C@@](C(OC(C)=O)[C@@H]1OC(=O)C=4C=COC4)(C(C)(C)O3)[H])[C@@](C)(O)CC[C@@H]2OC(C)=O</chem>            | 50 µM <sup>90</sup>           | Lifespan                | Mean and maximum lifespan                                                     | Improved | n.d. | N2     | L4    | OP50 | NGM agar | n.d.              | n.d. concentration of DMSO |
| <b>Celaspaculin N</b>                                                       | <chem>C(O)[C@@]12[C@@]3(C(OC(C)=O)[C@@]([C@](C)(C)O3)([C@H](OC(=O)C=4C=COC4)[C@@H]1OC(=O)C=5C=COC5)[H])[C@@](C)(O)CC[C@@H]2OC(C)=O</chem>       | 50 µM <sup>90</sup>           | Lifespan                | Mean and maximum lifespan                                                     | Improved | n.d. | N2     | L4    | OP50 | NGM agar | n.d.              | n.d. concentration of DMSO |
| <b>1α,6β,8β,15-Tetraacetoxy-9α-benzoyloxydihydro-β-agarofuran</b>           | <chem>C(OC(C)=O)[C@@]12[C@@]3([C@H](OC(C)=O)[C@@](C(OC(C)=O)[C@@H]1OC(=O)C4=CC=CC=C4)(C(C)(C)O3)[H])[C@@H](C)CC[C@@H]2OC(C)=O</chem>            | 50 µM <sup>90</sup>           | Lifespan                | Mean and maximum lifespan                                                     | Improved | n.d. | N2     | L4    | OP50 | NGM agar | n.d.              | n.d. concentration of DMSO |
| <b>1α,6β,15-Triacetoxy-8β,9β-difuroyloxy-4β-hydroxydihydro-β-agarofuran</b> | <chem>C(OC(C)=O)[C@@]12[C@@]3(C(OC(C)=O)[C@@]([C@H](OC(=O)C=4C=COC4)[C@@H]1OC(=O)C=5C=COC5)([C@](C)(C)O3)[H])[C@@](C)(O)CC[C@@H]2OC(C)=O</chem> | 50 µM <sup>90</sup>           | Lifespan                | Mean and maximum lifespan                                                     | Improved | n.d. | N2     | L4    | OP50 | NGM agar | n.d.              | n.d. concentration of DMSO |
| <b>trans-Communic acid</b>                                                  | <chem>C[C@@]12[C@@]([C@](C(O)=O)(C)CC1)(CCC(=C)[C@@H]2C/C=C/C=C)\C)[H]</chem>                                                                   | 1, 10 and 50 µM <sup>91</sup> | Lifespan                | Mean lifespan                                                                 | Improved | n.d. | N2     | L4    | OP50 | S-medium | Diluted in liquid | n.d.                       |
|                                                                             |                                                                                                                                                 |                               | ROS stress survival     | Induced with 0.4 M paraquat                                                   | Improved |      |        | Adult |      |          |                   |                            |
|                                                                             |                                                                                                                                                 |                               | Thermal stress survival | Induced with 35 °C                                                            | Improved |      |        | L4    |      |          |                   |                            |
| <b>Ginkgolide A</b>                                                         | <chem>O[C@@]12C34[C@@]5(C6([C@](O3)(OC(=O)[C@@H]6O)[H])[C@H](C(C)(C)C[C@]5(OC4=O)[H])C[C@@]1(O)C(=O)[C@H]2C)[H]</chem>                          | 25 µM <sup>92</sup>           | Proteotoxicity          | Paralysis assay with temperature-dependent amyloid beta expression in muscles | Improved | n.d. | CL4176 | L1    | OP50 | NGM agar | n.d.              | 0.2% DMSO                  |



|                        |                                                                                                                                                                                                                                                                                                                                                                                       |                                       |                                         |                                                                                          |                      |                          |    |   |                     |            |                              |               |
|------------------------|---------------------------------------------------------------------------------------------------------------------------------------------------------------------------------------------------------------------------------------------------------------------------------------------------------------------------------------------------------------------------------------|---------------------------------------|-----------------------------------------|------------------------------------------------------------------------------------------|----------------------|--------------------------|----|---|---------------------|------------|------------------------------|---------------|
|                        | (CO)O5)C2)(C(C)(C<br>)[C@@H](O)CC4)[<br>H])[H])[H]                                                                                                                                                                                                                                                                                                                                    |                                       |                                         |                                                                                          |                      |                          |    |   |                     |            |                              |               |
| <b>Ginsenoside Re</b>  | C[C@]12[C@@]([C@@]<br>C@]3(C)[C@@]([C<br>@@H](O)[C@H]4[C<br>C@H](O)[C@H]5[C<br>@H](O)[C@H](O)[<br>C@@H](O)[C@H](<br>C)O5)[C@@H](O)[<br>C@H](O)[C@@H](<br>CO)O4)C1)(C(C)(C<br>[C@@H](O)CC3)[<br>H])(C[C@@H](O)[<br>C@]6([C@@]2(C)<br>CC[C@@]6([C@@<br>])(O[C@@H]7O[C<br>@H](CO)[C@@H](<br>O)[C@H](O)[C@H]<br>7O)(CCC=C(C)C)[<br>H])[H])[H]                                             | 24.5 µg/ml ±<br>25.9 µM <sup>96</sup> | ROS stress survival<br>Autofluorescence | Induced with 7 mM tert-butylhydroperoxid<br>Microscopy and image processing (GFP filter) | Improved<br>Improved | sir2.1, skn-1,<br>daf-16 | N2 | A | UV-inactivated OP50 | Solid agar | Diluted in<br>autoclaved NGM | 0.04%<br>DMSO |
| <b>Ginsenoside Rb1</b> | C[C@]12[C@@]([C@@]<br>C@]3(C)[C@@]([C<br>C1)(C(C)[C@@<br>H](O)[C@H]4[C@H<br>])(O[C@@H]5O[C<br>@H](CO)[C@@H](<br>O)[C@H](O)[C@H]<br>5O)[C@@H](O)[C<br>@H](O)[C@@H](C<br>O)O4)CC3)[H])(C[C<br>@@H](O)[C@]6([<br>C@@]2(C)CC[C@<br>@]6([C@@]([O[C<br>@@H]7O[C@H](C<br>O)[C@@H]8O[C@<br>H])(CO)[C@@H](O<br>[C@H](O)[C@H]8<br>O)[C@@H](O)[C@<br>H](O)[C@H]7O)(C<br>CC=C(C)C)[H])[H<br>])[H] | 20 µg/ml ±<br>18.0 µM <sup>96</sup>   | ROS stress survival<br>Autofluorescence | Induced with 7 mM tert-butylhydroperoxid<br>Microscopy and image processing (GFP filter) | Improved<br>Improved | sir2.1, skn-1,<br>daf-16 | N2 | A | UV-inactivated OP50 | Solid agar | Diluted in<br>autoclaved NGM | 0.04%<br>DMSO |
| <b>Ginsenoside Rh2</b> | C[C@]12[C@@]3(<br>C)[C@@]([C@@]<br>[C@@](CCC=C(C)C<br>)C)O)(CC3)[H])([C<br>@H](O)C[C@@]1(<br>[C@]4(C)[C@@](C<br>C2)(C(C)[C@@<br>H](O)[C@@H]5O[C<br>@H](CO)[C@@H](<br>O)[C@H](O)[C@H]<br>5O)CC4)[H])[H])[H]                                                                                                                                                                            | 3 µg/ml ±<br>4.8 µM <sup>96</sup>     | ROS stress survival                     | Induced with 7 mM tert-butylhydroperoxid                                                 | No effect            | n.d.                     | N2 | A | UV-inactivated OP50 | NGM agar   | Diluted in<br>autoclaved NGM | 0.04%<br>DMSO |

|                        |                                                                                                                                                                                                                                                              |                                        |                     |                                                  |           |      |    |    |                     |          |                           |            |
|------------------------|--------------------------------------------------------------------------------------------------------------------------------------------------------------------------------------------------------------------------------------------------------------|----------------------------------------|---------------------|--------------------------------------------------|-----------|------|----|----|---------------------|----------|---------------------------|------------|
|                        | ]                                                                                                                                                                                                                                                            |                                        |                     |                                                  |           |      |    |    |                     |          |                           |            |
| <b>Ginsenoside Rd</b>  | C[C@]12[C@@]([C@]3(C)[C@@](C1)(C(C)(C)[C@@H](O[C@H]4[C@H](O[C@@H]5O[C@H](CO)[C@@H](O)[C@H]5O)[C@@H](O)[C@H](O)[C@@H](C(O)O4)CC3)[H])(C[C@@H](O)[C@]6([C@@]2(C)CC[C@@]6([C@@](O[C@@H]7O[C@H](C(O)[C@@H](O)[C@H](O)[C@H]7O)(C(C)=C(C)C)[H])[H])                | 2.5 µg/ml $\pm$ 2.6 µM <sup>96</sup>   | ROS stress survival | Induced with 7 mM tert-butylhydroperoxid         | No effect | n.d. | N2 | A  | UV-inactivated OP50 | NGM agar | Diluted in autoclaved NGM | 0.04% DMSO |
| <b>Ginsenoside Rc</b>  | C[C@]12[C@@]([C@]3(C)[C@@](C1)(C(C)(C)[C@@H](O[C@H]4[C@H](O[C@@H]5O[C@H](CO)[C@@H](O)[C@H]5O)[C@@H](O)[C@H](C(O)O4)CC3)[H])(C[C@@H](O)[C@]6([C@@]2(C)CC[C@@]6([C@@](O[C@@H]7O[C@H](C(O)[C@@H]8O[C@H](CO)[C@H](O)[C@H]8O)[C@@H](O)[C@H]7O)(CCC=C(C)C)[H])[H]) | 2 µg/ml $\pm$ 1.9 µM <sup>96</sup>     | ROS stress survival | Induced with 7 mM tert-butylhydroperoxid         | No effect | n.d. | N2 | A  | UV-inactivated OP50 | NGM agar | Diluted in autoclaved NGM | 0.04% DMSO |
| <b>Ginsenoside Rh</b>  | C[C@]12[C@@]([C@]3(C)[C@@]([C@@H](O[C@@H]4O[C@H](CO)[C@@H](O)[C@H]4O)C1)(C(C)(C)[C@@H](O)CC3)[H])(C[C@@H](O)[C@]5([C@@]2(C)CC[C@@]5([C@@](CCC=C(C)C)(C)O)[H])[H])                                                                                            | 0.5 µg/ml $\pm$ 782.6 nM <sup>96</sup> | ROS stress survival | Induced with 7 mM tert-butylhydroperoxid         | No effect | n.d. | N2 | A  | UV-inactivated OP50 | NGM agar | Diluted in autoclaved NGM | 0.04% DMSO |
| <b>1-O-[2,3,4-tri-</b> | C[C@@]12[C@]3                                                                                                                                                                                                                                                | 100 µM <sup>97</sup>                   | ROS stress survival | Induced with 40 mM H <sub>2</sub> O <sub>2</sub> | Improved  | n.d. | N2 | L3 | OP50                | S medium | Diluted in liquid         | n.d.       |







Table SI 15. Multicomponent mixtures from marine invertebrate sources

|                          |                     |      |         |                                                                                                                         |               |                      |                                                                                     |                                        |                     |                             |    |   |      |          |                   |         |           |        |
|--------------------------|---------------------|------|---------|-------------------------------------------------------------------------------------------------------------------------|---------------|----------------------|-------------------------------------------------------------------------------------|----------------------------------------|---------------------|-----------------------------|----|---|------|----------|-------------------|---------|-----------|--------|
| <i>Meretrix meretrix</i> | Veneridae; Mollusca | Meat | Ethanol | Crude clam meat extract was desalted by gel filtration chromatography (Sephadex G-10)                                   | Total protein | n.d.                 | Bioactivity guided isolation led to the identification and synthesis of 25 peptides | 0.25, 0.5, 1, 2, 4 mg/mL <sup>85</sup> | ROS stress survival | Induced with 50 mM paraquat | N2 | A | NA22 | S medium | Diluted in liquid | 0% DMSO | Improved  | daf-16 |
|                          |                     |      |         | Subfraction of peptide fraction: Low molecular weight peptide fraction (<3 kDa) obtained by ultrafiltration tubes       | n.d.          | n.d.                 | Bioactivity guided isolation led to the identification and synthesis of 25 peptides | 0.5 and 1, mg/mL <sup>85</sup>         | ROS stress survival | Induced with 50 mM paraquat | N2 | A | NA22 | S medium | Diluted in liquid | 0% DMSO | Improved  | daf-16 |
|                          |                     |      |         | Subfraction 1 of low molecular weight peptide fraction (<3 kDa) obtained by Sephadex G-25 gel filtration chromatography | n.d.          | HPLC-MS <sup>2</sup> | Bioactivity guided isolation led to the identification and synthesis of 25 peptides | 0.5 and 1, mg/mL <sup>85</sup>         | ROS stress survival | Induced with 50 mM paraquat | N2 | A | NA22 | S medium | Diluted in liquid | 0% DMSO | Improved  | daf-16 |
|                          |                     |      |         | Subfraction 2 of low molecular weight peptide fraction (<3 kDa) obtained by Sephadex G-25 gel filtration chromatography | n.d.          | n.d.                 | n.d.                                                                                | 0.5 and 1, mg/mL <sup>85</sup>         | ROS stress survival | Induced with 50 mM paraquat | N2 | A | NA22 | S medium | Diluted in liquid | 0% DMSO | Improved  | n.d.   |
|                          |                     |      |         | Subfraction 3 of low molecular weight peptide fraction (<3 kDa) obtained by Sephadex G-25 gel filtration chromatography | n.d.          | n.d.                 | n.d.                                                                                | 0.5 and 1, mg/mL <sup>85</sup>         | ROS stress survival | Induced with 50 mM paraquat | N2 | A | NA22 | S medium | Diluted in liquid | 0% DMSO | No effect | n.d.   |
|                          |                     |      |         | Subfraction 4 of low molecular weight peptide fraction (<3 kDa) obtained by Sephadex G-25 gel filtration chromatography | n.d.          | n.d.                 | n.d.                                                                                | 0.5 and 1, mg/mL <sup>85</sup>         | ROS stress survival | Induced with 50 mM paraquat | N2 | A | NA22 | S medium | Diluted in liquid | 0% DMSO | No effect | n.d.   |
|                          |                     |      |         | Subfraction 5 of low molecular weight peptide fraction (<3 kDa)                                                         | n.d.          | n.d.                 | n.d.                                                                                | 0.5 and 1, mg/mL <sup>85</sup>         | ROS stress survival | Induced with 50 mM paraquat | N2 | A | NA22 | S medium | Diluted in liquid | 0% DMSO | No effect | n.d.   |

|                                |                              |                    |         |                                                         |                                              |          |                                                                                        |                                              |          |                                   |                         |                                                               |         |           |           |         |          |                               |
|--------------------------------|------------------------------|--------------------|---------|---------------------------------------------------------|----------------------------------------------|----------|----------------------------------------------------------------------------------------|----------------------------------------------|----------|-----------------------------------|-------------------------|---------------------------------------------------------------|---------|-----------|-----------|---------|----------|-------------------------------|
|                                |                              |                    |         | obtained by Sephadex G-25 gel filtration chromatography |                                              |          |                                                                                        |                                              |          |                                   |                         |                                                               |         |           |           |         |          |                               |
| <i>Holothuria leucospilota</i> | Holothuriidae; Echinodermata | Body wall          | Ethanol | Crude extract                                           | Total antioxidants                           | n.d.     | n.d.                                                                                   | 10, 100, 500, and 1,000 µg/ml <sup>100</sup> | Lifespan | Mean, median and maximum lifespan | N2                      | L4                                                            | OP50    | Solid NGM | n.d.      | 1% DMSO | Improved | n.d.                          |
|                                |                              |                    |         |                                                         |                                              |          |                                                                                        |                                              |          |                                   |                         | L1                                                            |         |           |           |         | Improved |                               |
|                                |                              |                    | Butanol | Crude extract                                           | Total antioxidants                           | NMR      | The class of triterpene glycosides were tentatively identified with <sup>1</sup> H-NMR | 10, 100, 500, and 1,000 µg/ml <sup>100</sup> | Lifespan | Mean, median and maximum lifespan | N2                      | L4                                                            | OP50    | Solid NGM | n.d.      | 1% DMSO | Improved | sir-2.1, jnk-1, daf-16, age-1 |
|                                |                              |                    |         |                                                         |                                              |          |                                                                                        |                                              |          |                                   |                         | L1                                                            |         |           |           |         | Improved |                               |
|                                |                              |                    |         |                                                         |                                              |          |                                                                                        |                                              |          |                                   | Autofluorescence        | Filter (360-370/420-460 nm); microscopy and image processing  |         |           | Improved  |         |          |                               |
|                                |                              |                    |         |                                                         |                                              |          |                                                                                        |                                              |          |                                   | Thermal stress survival | Induced with 35°C                                             |         |           | Improved  |         |          |                               |
|                                |                              |                    |         |                                                         |                                              |          |                                                                                        |                                              |          |                                   | ROS stress survival     | Induced with 250 mM paraquat                                  | N2      |           | Improved  |         |          |                               |
|                                |                              |                    |         |                                                         |                                              |          |                                                                                        |                                              |          |                                   | UV stress survival      | Induced with UV 0.05 J/cm <sup>2</sup> for 60 sec             |         |           | Improved  |         |          |                               |
|                                |                              |                    |         |                                                         |                                              |          |                                                                                        |                                              |          |                                   | ROS levels              | Measurement of intracellular dichlorofluorescein fluorescence |         |           | No effect |         |          |                               |
|                                |                              |                    |         |                                                         |                                              |          |                                                                                        |                                              |          |                                   | Nuclear translocation   | DAF-16::GFP                                                   | TJ356   |           | Improved  |         |          |                               |
| Aqueous                        | Crude extract                | Total antioxidants | n.d.    | n.d.                                                    | 10, 100, 500, and 1,000 µg/ml <sup>100</sup> | Lifespan | Mean, median and maximum lifespan                                                      | N2                                           | L4       | OP50                              | Solid NGM               | n.d.                                                          | 1% DMSO | No effect | n.d.      |         |          |                               |
|                                |                              |                    |         |                                                         |                                              |          |                                                                                        |                                              | L1       |                                   |                         |                                                               |         | No effect |           |         |          |                               |

Table SI 16. Multicomponent mixtures from fungal sources

|                             |                                                                  |            |                            |                                                                                                                                             |      |      |      |                                                 |          |                             |    |    |      |          |                   |         |                              |                                            |
|-----------------------------|------------------------------------------------------------------|------------|----------------------------|---------------------------------------------------------------------------------------------------------------------------------------------|------|------|------|-------------------------------------------------|----------|-----------------------------|----|----|------|----------|-------------------|---------|------------------------------|--------------------------------------------|
| <i>Cetraria islandica</i>   | Parmeliaceae; Ascomycota                                         | Lichen     | dichloromethane – methanol | Lead-like enhanced extract: Combined dichloromethane and methanol extracts of degreased (hexane) material, tannin depleted by polyamide SPE | n.d. | n.d. | n.d. | 25 and 100 µg/ml <sup>2</sup>                   | Lifespan | Death Time 50 (DT50)        | N2 | L4 | OP50 | S medium | Diluted in liquid | 1% DMSO | No effect                    | n.d.                                       |
| <i>Fomitopsis pinicola</i>  | Fomitopsidaceae, Basidiomycota                                   | Fruit body | dichloromethane – methanol | Lead-like enhanced extract: Combined dichloromethane and methanol extracts of degreased (hexane) material, tannin depleted by polyamide SPE | n.d. | n.d. | n.d. | 25 and 100 µg/ml <sup>2</sup>                   | Lifespan | Death Time 50 (DT50)        | N2 | L4 | OP50 | S medium | Diluted in liquid | 1% DMSO | No effect                    | n.d.                                       |
| <i>Piptoporus betulinus</i> |                                                                  | Fruit body | dichloromethane – methanol | Lead-like enhanced extract: Combined dichloromethane and methanol extracts of degreased (hexane) material, tannin depleted by polyamide SPE | n.d. | n.d. | n.d. | 25 and 100 µg/ml <sup>2</sup>                   | Lifespan | Death Time 50 (DT50)        | N2 | L4 | OP50 | S medium | Diluted in liquid | 1% DMSO | No effect                    | n.d.                                       |
| <i>Ganoderma lucidum</i>    | Ganodermataceae, Basidiomycota                                   | Fruit body | Aqueous                    | Crude extract                                                                                                                               | n.d. | n.d. | n.d. | 0.75, 3.75, 7.5, 11.25, 15 mg/ml <sup>101</sup> | Lifespan | Median and maximum lifespan | N2 | A  | OP50 | S medium | Diluted in liquid | 0% DMSO | Improved                     | <i>eat-2</i> , <i>rsk-1</i> , <i>glp-1</i> |
|                             |                                                                  |            | dichloromethane – methanol | Lead-like enhanced extract: Combined dichloromethane and methanol extracts of degreased (hexane) material, tannin depleted by polyamide SPE | n.d. | n.d. | n.d. | 25 and 100 µg/ml <sup>2</sup>                   | Lifespan | ROS stress survival         |    |    |      |          |                   |         | Induced with 100 mM paraquat |                                            |
| Death Time 50 (DT50)        | Induced with 10 mM K <sub>2</sub> Cr <sub>2</sub> O <sub>7</sub> | Improved   |                            |                                                                                                                                             |      |      |      |                                                 |          | n.d.                        |    |    |      |          |                   |         |                              |                                            |
| <i>Gloeophyllum</i>         | Gloeophylla                                                      | Fruit body | dichloromethane – methanol | Lead-like enhanced extract:                                                                                                                 | n.d. | n.d. | n.d. | 25 and 100 µg/ml <sup>2</sup>                   | Lifespan | Death Time 50 (DT50)        | N2 | L4 | OP50 | S medium | Diluted in liquid | 1% DMSO | No effect                    | n.d.                                       |

|                            |                              |               |                               |                                                                                                                                             |                       |                                                                                                                                                       |                                        |                               |                                                               |                                   |            |               |            |                   |                              |            |                |         |
|----------------------------|------------------------------|---------------|-------------------------------|---------------------------------------------------------------------------------------------------------------------------------------------|-----------------------|-------------------------------------------------------------------------------------------------------------------------------------------------------|----------------------------------------|-------------------------------|---------------------------------------------------------------|-----------------------------------|------------|---------------|------------|-------------------|------------------------------|------------|----------------|---------|
| <i>odoratum</i>            | ceae, Basidiomycota          |               | hexane – methanol             | Combined dichloromethane and methanol extracts of degreased (hexane) material, tannin depleted by polyamide SPE                             |                       |                                                                                                                                                       |                                        | $\mu\text{g/ml}^2$            |                                                               |                                   |            |               |            |                   | liquid                       | O          |                |         |
| <i>Inonotus obliquus</i>   | Hymenochaetae, Basidiomycota | Sclerotia     | dichloromethane – methanol    | Lead-like enhanced extract: Combined dichloromethane and methanol extracts of degreased (hexane) material, tannin depleted by polyamide SPE | n.d.                  | HPLC-CAD/UV                                                                                                                                           | n.d.                                   | 25 and 100 $\mu\text{g/ml}^2$ | Lifespan                                                      | Death Time 50 (DT50)              | N2         | L4            | OP50       | S medium          | Diluted in liquid            | 1% DMSO    | Improved       | n.d.    |
|                            |                              |               |                               |                                                                                                                                             | Aqueous acetone (80%) | Crude extract                                                                                                                                         | n.d.                                   | n.d.                          | n.d.                                                          | 50 and 200 $\mu\text{g/ml}^{102}$ | Lifespan   | Mean lifespan | N2         | A                 | OP50                         | Solid agar | Mixed with NGM | 0% DMSO |
|                            |                              |               |                               |                                                                                                                                             |                       |                                                                                                                                                       |                                        |                               | Nuclear translocation                                         | DAF-16::GFP                       | TJ356      |               |            |                   |                              |            | Improved       |         |
|                            |                              |               |                               |                                                                                                                                             |                       |                                                                                                                                                       |                                        |                               |                                                               | HSF1::GFP                         | OG497      |               |            |                   |                              |            | No effect      |         |
| <i>Poria cocos</i>         | Polyporaceae, Basidiomycota  | Fruiting body | Butyl-methyl ether – methanol | Combined crude extracts of (1) butyl-methyl ether (MTBE) - methanol and (2) methanol                                                        | n.d.                  | HPLC-MS                                                                                                                                               | n.d.                                   | 30 $\mu\text{g/ml}^{49}$      | Thermal stress survival                                       | Induced with 37° C                | N2         | L4            | OP50       | Solid NGM agar    | added to the NGM agar plates | 0.05% DMSO | No effect      | n.d.    |
| <i>Lignosus rhinoceros</i> | Fruiting body                | Ethanol       | Crude extract                 | Total phenols, total flavonoids, total antioxidants                                                                                         | GC-MS                 | Several compounds tentatively identified with GC-MS (e.g. Oleic acid, ergosterol, 3,5-Dimethoxybenzoic acid, fatty acids and fatty acid methyl ester) | 50, 100 and 200 $\mu\text{g/ml}^{103}$ | Lifespan elongation           | Mean Lifespan                                                 | N2                                | L1         | OP50          | S complete | Diluted in liquid | 1% DMSO                      | Improved   | daf-16         |         |
|                            |                              |               |                               |                                                                                                                                             |                       |                                                                                                                                                       |                                        | Pharyngeal pumping            | Pumping rate                                                  | N2                                | L4         |               | Solid agar |                   |                              |            |                |         |
|                            |                              |               |                               |                                                                                                                                             |                       |                                                                                                                                                       |                                        | Autofluorescence              | Fluorescence Channel n.d. Microscopy + Image Processing       | BA17                              | L1         |               | S complete |                   |                              |            |                |         |
|                            |                              |               |                               |                                                                                                                                             |                       |                                                                                                                                                       |                                        | ROS stress survival           | Induced with 80 $\mu\text{M}$ juglone                         | N2                                |            |               |            |                   |                              |            |                |         |
|                            |                              |               |                               |                                                                                                                                             |                       |                                                                                                                                                       |                                        | Antioxidant capacity          | Measurement of intracellular dichlorofluorescein fluorescence | N2                                |            |               |            |                   |                              |            |                |         |
|                            |                              |               |                               |                                                                                                                                             |                       |                                                                                                                                                       |                                        | Nuclear translocation         | DAF-16::GFP                                                   | TJ356                             |            |               |            |                   |                              |            |                |         |
|                            |                              |               |                               |                                                                                                                                             |                       |                                                                                                                                                       |                                        |                               | SKN-1::GFP                                                    | LD1                               |            |               |            |                   |                              |            |                |         |
| Aque                       | Crude hot water              | Total         | n.d.                          | n.d.                                                                                                                                        | 50, 100               | Lifespan                                                                                                                                              | Mean Lifespan                          | N2                            | L1                                                            | OP50                              | S complete | Dilute        | 1%         | Improved          | daf-16                       |            |                |         |

|                               |                                |                 |         |                                                      |                                                     |               |                                                                                                |                                        |                       |                                                                                             |       |                       |             |            |                   |            |           |        |
|-------------------------------|--------------------------------|-----------------|---------|------------------------------------------------------|-----------------------------------------------------|---------------|------------------------------------------------------------------------------------------------|----------------------------------------|-----------------------|---------------------------------------------------------------------------------------------|-------|-----------------------|-------------|------------|-------------------|------------|-----------|--------|
|                               |                                |                 | ous     | extract                                              | phenols, total flavonoids, total antioxidants       |               |                                                                                                | and 200 µg/ml <sup>103</sup>           | elongation            |                                                                                             |       |                       |             |            | d in liquid       | DMS O      | d         |        |
|                               |                                |                 |         |                                                      |                                                     |               |                                                                                                |                                        | Pharyngeal pumping    | Pumping rate                                                                                | N2    | L4                    |             | Solid agar |                   |            | Improved  |        |
|                               |                                |                 |         |                                                      |                                                     |               |                                                                                                |                                        | Autofluorescence      | Fluorescence Channel n.d. Microscopy + Image Processing                                     | BA17  | L1                    |             | S complete |                   |            | Improved* |        |
|                               |                                |                 |         |                                                      |                                                     |               |                                                                                                |                                        | ROS stress survival   | Induced with 80 µM juglone                                                                  | N2    |                       |             |            |                   |            | Improved  |        |
|                               |                                |                 |         |                                                      |                                                     |               |                                                                                                |                                        | Antioxidant capacity  | Measurement of intracellular dichlorofluorescein fluorescence Microscopy + Image Processing | N2    |                       |             |            |                   |            | Improved  |        |
|                               |                                |                 |         |                                                      |                                                     |               |                                                                                                |                                        | Nuclear translocation | DAF-16::GFP                                                                                 | TJ356 |                       |             |            |                   |            | Improved  |        |
|                               |                                |                 |         |                                                      |                                                     |               |                                                                                                |                                        |                       | SKN-1::GFP                                                                                  | LD1   |                       |             |            |                   |            | No effect |        |
| <i>Lignosus rhinoceros</i>    |                                |                 | Aqueous | Crude cold water extract                             | Total phenols, total flavonoids, total antioxidants | n.d.          | n.d.                                                                                           | (50, 100 and 200 µg/ml) <sup>103</sup> | Lifespan elongation   | Mean Lifespan                                                                               | N2    | L1                    | OP50        | S complete | Diluted in liquid | 1% DMS O   | Improved  | daf-16 |
|                               |                                |                 |         |                                                      |                                                     |               |                                                                                                |                                        | Pharyngeal pumping    | Pumping rate                                                                                | N2    | L4                    |             | Solid agar |                   |            | Improved  |        |
|                               |                                |                 |         |                                                      |                                                     |               |                                                                                                |                                        | Autofluorescence      | Fluorescence Channel n.d. Microscopy + Image Processing                                     | BA17  | L1                    |             | S complete |                   |            | Improved* |        |
|                               |                                |                 |         |                                                      |                                                     |               |                                                                                                |                                        | ROS stress survival   | Induced with 80 µM juglone                                                                  | N2    |                       |             |            |                   |            | Improved  |        |
|                               |                                |                 |         |                                                      |                                                     |               |                                                                                                |                                        | Antioxidant capacity  | Measurement of intracellular dichlorofluorescein fluorescence Microscopy + Image Processing | N2    |                       |             |            |                   |            | Improved  |        |
|                               |                                |                 |         |                                                      |                                                     |               |                                                                                                |                                        |                       |                                                                                             |       | Nuclear translocation | DAF-16::GFP | TJ356      |                   |            |           |        |
|                               |                                |                 |         |                                                      |                                                     |               |                                                                                                |                                        |                       | SKN-1::GFP                                                                                  | LD1   |                       |             |            |                   |            | No effect |        |
| <i>Auricularia polytricha</i> | Auriculariaceae, Basidiomycota | Fruiting bodies | Ethanol | Crude ethanol extract of degreased (hexane) material | Total phenols, total flavonoids, total antioxidants | TLC and GC-MS | Triacylglycerols, linoleic acid, and ergosterol were tentatively identified with GC-MS and TLC | 20 and 40 µg/mL <sup>104</sup>         | Lifespan              | Mean and maximum lifespan                                                                   | N2    | L4                    | OP50        | Solid agar | n.d.              | 0.1% DMS O | Improved  | n.d.   |
|                               |                                |                 |         |                                                      |                                                     |               |                                                                                                |                                        | Pharyngeal pumping    | Pumping rate                                                                                |       |                       |             |            |                   |            | Improved  |        |
| <i>Grifola</i>                | Merip                          | Fruiting        | Aqueous | Crude extract                                        | Total protein,                                      | n.d.          | n.d.                                                                                           | 10 and                                 | Lifespan              | Median lifespan                                                                             | N2    | L1                    | OP50        | Solid NGM  | Adde              | 0%         | Improve   | daf-16 |

|                 |                                       |        |     |  |                                                                          |  |  |                               |                               |                      |  |  |  |      |                                                          |          |                   |  |
|-----------------|---------------------------------------|--------|-----|--|--------------------------------------------------------------------------|--|--|-------------------------------|-------------------------------|----------------------|--|--|--|------|----------------------------------------------------------|----------|-------------------|--|
| <i>frondosa</i> | ilacea<br>e,<br>Basidi<br>omyc<br>ota | bodies | ous |  | total<br>polysacchari<br>des, total<br>phenols,<br>total<br>antioxidants |  |  | 20<br>µg/mL<br><sup>105</sup> | Thermal<br>stress<br>survival | Induced with<br>35°C |  |  |  | agar | d to<br>agar<br>befor<br>e<br>OP50<br>were<br>seede<br>d | DMS<br>O | d<br>No<br>effect |  |
|                 |                                       |        |     |  |                                                                          |  |  |                               |                               |                      |  |  |  |      |                                                          |          |                   |  |

Table SI 17. Multicomponent mixtures from plant sources

|                                                     |                           |                            |                                                                                               |                    |                        |                             |                                                                                                                                                                                                    |                       |                                                                      |                                                                                       |                                          |                |            |            |                                          |                |                            |      |                                                                                                       |                         |                     |                             |    |    |      |            |                                          |                |          |      |
|-----------------------------------------------------|---------------------------|----------------------------|-----------------------------------------------------------------------------------------------|--------------------|------------------------|-----------------------------|----------------------------------------------------------------------------------------------------------------------------------------------------------------------------------------------------|-----------------------|----------------------------------------------------------------------|---------------------------------------------------------------------------------------|------------------------------------------|----------------|------------|------------|------------------------------------------|----------------|----------------------------|------|-------------------------------------------------------------------------------------------------------|-------------------------|---------------------|-----------------------------|----|----|------|------------|------------------------------------------|----------------|----------|------|
| <i>Chondrus crispus</i>                             | Gigartineae, Rhodophyceae | Seaweed                    | Methanol                                                                                      | Crude extract      | Total antioxidants     | <sup>1</sup> H 500 MHz NMR  | Bioactivity-guided fractionation; several compounds identified by <sup>1</sup> H NMR dereplication (Floridoside, isothionic acid, taurine, unsaturated fatty acids, phenylalanine and L-cirtuline) | 1 mg/ml <sup>18</sup> | Lifespan                                                             | Mean lifespan                                                                         | N2                                       | L1             | OP50       | Solid agar | added to the NGM before OP50 were spread | 0.05–0.1% MeOH | No effect                  | n.d. |                                                                                                       |                         |                     |                             |    |    |      |            |                                          |                |          |      |
|                                                     |                           |                            |                                                                                               |                    |                        |                             |                                                                                                                                                                                                    |                       | ROS stress survival                                                  | Induced with 300 μM juglone                                                           |                                          |                |            |            |                                          |                | Improved                   |      |                                                                                                       |                         |                     |                             |    |    |      |            |                                          |                |          |      |
|                                                     |                           |                            |                                                                                               |                    |                        |                             |                                                                                                                                                                                                    |                       |                                                                      | Induced with 500 μM juglone                                                           |                                          |                |            |            |                                          |                | Improved                   |      |                                                                                                       |                         |                     |                             |    |    |      |            |                                          |                |          |      |
|                                                     |                           |                            |                                                                                               |                    |                        |                             |                                                                                                                                                                                                    |                       | ROS levels                                                           | Measurement of intracellular dichlorofluorescein fluorescence                         |                                          |                |            |            |                                          |                | Improved                   |      |                                                                                                       |                         |                     |                             |    |    |      |            |                                          |                |          |      |
|                                                     |                           |                            |                                                                                               |                    |                        |                             |                                                                                                                                                                                                    |                       | Antioxidant capacity                                                 | Measurement of intracellular dichlorofluorescein fluorescence after juglone treatment |                                          |                |            |            |                                          |                | Improved                   |      |                                                                                                       |                         |                     |                             |    |    |      |            |                                          |                |          |      |
|                                                     |                           |                            |                                                                                               |                    |                        |                             |                                                                                                                                                                                                    |                       | Apolar fraction of the methanolic crude extract (n.d. fractionation) | n.d.                                                                                  |                                          |                |            |            |                                          |                | <sup>1</sup> H 500 MHz NMR |      | Compound class identified by <sup>1</sup> H NMR dereplication (Fatty acids)                           | 100 μg/ml <sup>18</sup> | ROS stress survival | Induced with 300 μM juglone | N2 | L1 | OP50 | Solid agar | added to the NGM before OP50 were spread | 0.05–0.1% MeOH | Improved | n.d. |
|                                                     |                           |                            |                                                                                               |                    |                        |                             |                                                                                                                                                                                                    |                       | Subfraction of apolar fraction (n.d. fractionation)                  | n.d.                                                                                  |                                          |                |            |            |                                          |                | <sup>1</sup> H 500 MHz NMR |      | Compound class identified by <sup>1</sup> H NMR dereplication (unsaturated fatty acids & carotenoids) | n.d. <sup>18</sup>      | ROS stress survival | Induced with 300 μM juglone | N2 | L1 | OP50 | Solid agar | added to the NGM before OP50 were spread | 0.05–0.1% MeOH | Improved | n.d. |
|                                                     |                           |                            |                                                                                               |                    |                        |                             |                                                                                                                                                                                                    |                       | Subfraction of apolar fraction (n.d. fractionation)                  | n.d.                                                                                  |                                          |                |            |            |                                          |                | <sup>1</sup> H 500 MHz NMR |      | Compound class identified by <sup>1</sup> H NMR dereplication (chlorophyll)                           | n.d. <sup>18</sup>      | ROS stress survival | Induced with 300 μM juglone | N2 | L1 | OP50 | Solid agar | added to the NGM before OP50 were spread | 0.05–0.1% MeOH | Improved | n.d. |
|                                                     |                           |                            |                                                                                               |                    |                        |                             |                                                                                                                                                                                                    |                       | Subfraction of apolar fraction (n.d. fractionation)                  | n.d.                                                                                  |                                          |                |            |            |                                          |                | <sup>1</sup> H 500 MHz NMR |      | Compound class identified by <sup>1</sup> H NMR dereplication (lutein or carotenoids)                 | n.d. <sup>18</sup>      | ROS stress survival | Induced with 300 μM juglone | N2 | L1 | OP50 | Solid agar | added to the NGM before OP50 were spread | 0.05–0.1% MeOH | Improved | n.d. |
| Subfraction of apolar fraction (n.d. fractionation) | n.d.                      | <sup>1</sup> H 500 MHz NMR | Compound class identified by <sup>1</sup> H NMR dereplication (monogalactosyldiacylglycerols) | n.d. <sup>18</sup> | ROS stress survival    | Induced with 300 μM juglone | N2                                                                                                                                                                                                 | L1                    | OP50                                                                 | Solid agar                                                                            | added to the NGM before OP50 were spread | 0.05–0.1% MeOH | Improved   | n.d.       |                                          |                |                            |      |                                                                                                       |                         |                     |                             |    |    |      |            |                                          |                |          |      |
| Subfraction of apolar fraction (n.d. fractionation) | n.d.                      | <sup>1</sup> H 500 MHz NMR | Compound class identified by <sup>1</sup> H NMR dereplication (glycolipids)                   | n.d. <sup>18</sup> | ROS stress survival    | Induced with 300 μM juglone | N2                                                                                                                                                                                                 | L1                    | OP50                                                                 | Solid agar                                                                            | added to the NGM before OP50 were spread | 0.05–0.1% MeOH | No effect  | n.d.       |                                          |                |                            |      |                                                                                                       |                         |                     |                             |    |    |      |            |                                          |                |          |      |
|                                                     |                           | Water                      | Crude extract                                                                                 | n.d.               | <sup>1</sup> H 500 MHz | Two compounds identified    | 1 mg/ml                                                                                                                                                                                            | ROS stress            | Induced with 300                                                     | N2                                                                                    | L1                                       | OP50           | Solid agar | added      | 0.0%                                     | No effect      | n.d.                       |      |                                                                                                       |                         |                     |                             |    |    |      |            |                                          |                |          |      |

|                               |                                                                                      |            |                                                               |                                                                                                                                                      |      |                      |                                                                         |                                          |                         |                                                                               |        |    |      |            |                                          |                |           |          |                                |           |
|-------------------------------|--------------------------------------------------------------------------------------|------------|---------------------------------------------------------------|------------------------------------------------------------------------------------------------------------------------------------------------------|------|----------------------|-------------------------------------------------------------------------|------------------------------------------|-------------------------|-------------------------------------------------------------------------------|--------|----|------|------------|------------------------------------------|----------------|-----------|----------|--------------------------------|-----------|
|                               |                                                                                      |            |                                                               |                                                                                                                                                      |      | NMR                  | by <sup>1</sup> H NMR dereplication (floridoside and isothionic acid)   | <sup>18</sup>                            | survival                | µM juglone                                                                    |        |    |      |            | to the NGM before OP50 were spread       | MeOH           |           |          |                                |           |
| <i>Drynaria fortunei</i>      | Polypodiaceae                                                                        | Roots      | dichloromethane – methanol                                    | Lead-like enhanced extract: Combined dichloromethane and methanol extracts of degreased (hexane) material, tannin depleted by polyamide SPE          | n.d. | n.d.                 | n.d.                                                                    | 25 and 100 µg/ml <sup>2</sup>            | Lifespan                | Death Time 50 (DT50)                                                          | N2     | L4 | OP50 | S medium   | Diluted in liquid                        | 1% DMSO        | No effect | n.d.     |                                |           |
| <i>Ginkgo biloba</i>          | Ginkgoaceae                                                                          | Leaves     | standardised extract EGb 761                                  |                                                                                                                                                      |      |                      |                                                                         | 100 µg/ml <sup>106</sup>                 | ROS stress survival     | Induced with 160 µM juglone                                                   | CL2070 | L1 | OP50 | Solid agar | mixed with OP50                          | 0.01% DMSO     | Improved  | n.d.     |                                |           |
|                               |                                                                                      |            |                                                               |                                                                                                                                                      |      |                      |                                                                         | 100 µg/ml <sup>107</sup>                 | Proteotoxicity          | Paralysis assay with temperature-dependent amyloid beta expression in muscles | CL4176 | L1 | OP50 | Solid agar | Supplemented to NGM plates               | 5% DMSO        | Improved  | n.d.     |                                |           |
|                               |                                                                                      |            |                                                               |                                                                                                                                                      |      |                      |                                                                         | 1 mg/ml <sup>18</sup>                    | ROS stress survival     | Induced with 300 µM juglone<br>Induced with 500 µM juglone                    | N2     | L1 | OP50 | Solid agar | added to the NGM before OP50 were spread | 0.05–0.1% MeOH | Improved  | n.d.     |                                |           |
|                               |                                                                                      | ROS levels | Measurement of intracellular dichlorofluorescein fluorescence | n.d.                                                                                                                                                 |      |                      |                                                                         |                                          |                         |                                                                               |        |    |      |            |                                          |                |           |          |                                |           |
|                               |                                                                                      | Seeds      | Aqueous                                                       | Crude extract                                                                                                                                        | n.d. | HPLC-MS <sup>2</sup> | Several compounds were tentatively identified with HPLC-MS <sup>2</sup> | 0, 5, 10, 20, or 40 mg/mL <sup>108</sup> | Lifespan                | mean lifespan                                                                 | N2     | L4 | OP50 | Solid agar | n.d.                                     | 0% DMSO        | Improved  | Improved | <i>daf-2</i> and <i>daf-16</i> |           |
|                               |                                                                                      |            |                                                               |                                                                                                                                                      |      |                      |                                                                         |                                          | Locomotion              | Head swing frequency and Body bending frequency                               |        |    |      |            |                                          |                |           |          |                                | Improved  |
|                               |                                                                                      |            |                                                               |                                                                                                                                                      |      |                      |                                                                         |                                          | Pharyngeal pumping      | Pumping rate                                                                  |        |    |      |            |                                          |                |           |          |                                | No effect |
|                               |                                                                                      |            |                                                               |                                                                                                                                                      |      |                      |                                                                         |                                          | Autofluorescence        | Filter (488/620 nm); microscopy and image processing                          |        |    |      |            |                                          |                |           |          |                                | Improved  |
|                               |                                                                                      |            |                                                               |                                                                                                                                                      |      |                      |                                                                         |                                          | Thermal stress survival | Induced with 35°C                                                             |        |    |      |            |                                          |                |           |          |                                | Improved  |
|                               |                                                                                      |            |                                                               |                                                                                                                                                      |      |                      |                                                                         |                                          | ROS stress survival     | Induced with 400 µM juglone                                                   |        |    |      |            |                                          |                |           |          |                                | Improved  |
| ROS levels                    | Measurement of dichlorofluorescein fluorescence with microscopy and image processing |            |                                                               |                                                                                                                                                      |      |                      |                                                                         |                                          | No effect               |                                                                               |        |    |      |            |                                          |                |           |          |                                |           |
| Nuclear translocation         | DAF-16::GFP                                                                          |            |                                                               |                                                                                                                                                      |      |                      |                                                                         |                                          | TJ356                   | n.d.                                                                          |        |    |      |            |                                          |                |           |          |                                | Improved  |
| Proteotoxicity                | Paralysis assay with temperature-dependent amyloid beta expression in muscles        |            |                                                               |                                                                                                                                                      |      |                      |                                                                         |                                          | CL4176                  | n.d.                                                                          |        |    |      |            |                                          |                |           |          |                                | Improved  |
| <i>Platycladus orientalis</i> | Cupressaceae                                                                         | Seeds      | Petroleum ether                                               | Butanol fraction obtained as followed: crude dried petroleum ether extract was refluxed with ethanol and the ethanol extract dried. Then the ethanol | n.d. | n.d.                 | n.d.                                                                    | 500 µg/mL <sup>5</sup>                   | Lifespan                | Mean lifespan                                                                 | N2     | L4 | OP50 | Solid agar | diluted into OP50 and spread to plates   | n.d.           | Improved  | Improved | Improved                       |           |
|                               |                                                                                      |            |                                                               |                                                                                                                                                      |      |                      |                                                                         |                                          | Autofluorescence        | Microscopy + image processing (n.d. filter)                                   |        |    |      |            |                                          |                |           |          |                                | Improved  |
|                               |                                                                                      |            |                                                               |                                                                                                                                                      |      |                      |                                                                         |                                          | Thermal stress survival | Induced with 37 °C                                                            |        |    |      |            |                                          |                |           |          |                                | Improved  |
|                               |                                                                                      |            |                                                               |                                                                                                                                                      |      |                      |                                                                         |                                          | ROS stress survival     | Induced with 500 µM juglone                                                   |        |    |      |            |                                          |                |           |          |                                | Improved  |



|                                                                                   |                                   |                                                                                       |                                                     |                                                                                                                    |                                                                                                                                                                                                                                                                                                  |                                                               |                         |                                                                                      |                                                               |                                                               |                   |           |                   |                   |           |                             |          |        |
|-----------------------------------------------------------------------------------|-----------------------------------|---------------------------------------------------------------------------------------|-----------------------------------------------------|--------------------------------------------------------------------------------------------------------------------|--------------------------------------------------------------------------------------------------------------------------------------------------------------------------------------------------------------------------------------------------------------------------------------------------|---------------------------------------------------------------|-------------------------|--------------------------------------------------------------------------------------|---------------------------------------------------------------|---------------------------------------------------------------|-------------------|-----------|-------------------|-------------------|-----------|-----------------------------|----------|--------|
|                                                                                   |                                   |                                                                                       |                                                     | suspended in water and sequentially subjected to partitioning with the same volume of ethyl acetate and n-butanol) |                                                                                                                                                                                                                                                                                                  |                                                               |                         |                                                                                      | ROS levels                                                    | Measurement of intracellular dichlorofluorescein fluorescence |                   |           |                   |                   |           | Improved                    |          |        |
| <i>Chamaecyparis obtusa</i> var. <i>formosana</i>                                 | Leaves                            | Aqueous                                                                               | Crude extract                                       | Total phenols, total antioxidants                                                                                  | n.d.                                                                                                                                                                                                                                                                                             | Bioactivity-guided fractionation                              | 2 µg/mL <sup>8</sup>    | ROS stress survival                                                                  | Induced with 250 µM juglone                                   | N2                                                            | L1                | OP50      | S medium          | Diluted in liquid | 0.1% DMSO | Improved                    | n.d.     |        |
|                                                                                   |                                   |                                                                                       |                                                     |                                                                                                                    |                                                                                                                                                                                                                                                                                                  |                                                               |                         | ROS levels                                                                           | Measurement of intracellular dichlorofluorescein fluorescence |                                                               |                   |           |                   |                   |           | Improved                    |          |        |
|                                                                                   |                                   | Ethylacetat fraction of crude extract obtained by successive liquid-liquid separation | Total phenols, total antioxidants                   | HPLC-MS, NMR                                                                                                       | Bioactivity-guided fractionation led to the isolation of six compounds by semipreparative high-performance liquid chromatography (catechin, quercetin, quercetin-3-O-α-rhamnopyranoside, myricetin-3-O-α-rhamnopyranoside, vanillic acid and 4-hydroxybenzoic acid), characterized by NMR and MS | 2 and 20 µg/ml <sup>8</sup>                                   | Lifespan                | Mean and maximum lifespan                                                            | N2                                                            | L1                                                            | OP50              | S medium  | Diluted in liquid | 0.1% DMSO         | Improved  | n.d.                        |          |        |
|                                                                                   |                                   |                                                                                       |                                                     |                                                                                                                    |                                                                                                                                                                                                                                                                                                  |                                                               | Autofluorescence        | DAPI filter (340–380/435–485 nm) microscopy and image processing                     |                                                               |                                                               |                   |           |                   |                   | Improved  |                             |          |        |
|                                                                                   |                                   |                                                                                       |                                                     |                                                                                                                    |                                                                                                                                                                                                                                                                                                  |                                                               | ROS stress survival     | Induced with 250 µM juglone                                                          |                                                               |                                                               |                   |           |                   |                   | Improved  |                             |          |        |
|                                                                                   |                                   |                                                                                       |                                                     |                                                                                                                    |                                                                                                                                                                                                                                                                                                  |                                                               | ROS levels              | Measurement of intracellular dichlorofluorescein fluorescence                        |                                                               |                                                               |                   |           |                   |                   | Improved  |                             |          |        |
| Butanol fraction of crude extract obtained by successive liquid-liquid separation | Total phenols, total antioxidants | n.d.                                                                                  | n.d.                                                | 2 µg/mL <sup>8</sup>                                                                                               | ROS stress survival                                                                                                                                                                                                                                                                              | Induced with 250 µM juglone                                   | N2                      | L1                                                                                   | OP50                                                          | S medium                                                      | Diluted in liquid | 0.1% DMSO | Improved          | n.d.              |           |                             |          |        |
|                                                                                   |                                   |                                                                                       |                                                     |                                                                                                                    | ROS levels                                                                                                                                                                                                                                                                                       | Measurement of intracellular dichlorofluorescein fluorescence |                         |                                                                                      |                                                               |                                                               |                   |           | Improved          |                   |           |                             |          |        |
| Water fraction of crude extract obtained by successive liquid-liquid separation   | Total phenols, total antioxidants | n.d.                                                                                  | n.d.                                                | 2 µg/mL <sup>8</sup>                                                                                               | ROS stress survival                                                                                                                                                                                                                                                                              | Induced with 250 µM juglone                                   | N2                      | L1                                                                                   | OP50                                                          | S medium                                                      | Diluted in liquid | 0.1% DMSO | No effect         | n.d.              |           |                             |          |        |
|                                                                                   |                                   |                                                                                       |                                                     |                                                                                                                    | ROS levels                                                                                                                                                                                                                                                                                       | Measurement of intracellular dichlorofluorescein fluorescence |                         |                                                                                      |                                                               |                                                               |                   |           | No effect         |                   |           |                             |          |        |
| <i>Juniperus communis</i>                                                         | Fruits (berry cones)              | Essential oil                                                                         | Total phenols, total antioxidants, total flavonoids | GC-MS                                                                                                              | Several compounds were identified with GC-MS (e.g. α-pinene, limonene)                                                                                                                                                                                                                           | 0, 10, 50 and 100 ppm <sup>109</sup>                          | Lifespan                | Mean and maximum lifespan                                                            | N2                                                            | L1                                                            | OP50              | NGM agar  | n.d.              | n.d.              | Improved  | <i>daf-16, skn-1, hsf-1</i> |          |        |
|                                                                                   |                                   |                                                                                       |                                                     |                                                                                                                    |                                                                                                                                                                                                                                                                                                  |                                                               | Pharyngeal pumping      | Pumping rate                                                                         |                                                               |                                                               |                   |           |                   |                   | Improved  |                             |          |        |
|                                                                                   |                                   |                                                                                       |                                                     |                                                                                                                    |                                                                                                                                                                                                                                                                                                  |                                                               | Autofluorescence        | Filter (340–380/435–485) microscopy and image processing                             |                                                               |                                                               |                   |           |                   |                   | Improved  |                             |          |        |
|                                                                                   |                                   |                                                                                       |                                                     |                                                                                                                    |                                                                                                                                                                                                                                                                                                  |                                                               | thermal stress survival | Induced with 37 °C                                                                   |                                                               |                                                               |                   |           |                   |                   | Improved  |                             |          |        |
|                                                                                   |                                   |                                                                                       |                                                     |                                                                                                                    |                                                                                                                                                                                                                                                                                                  |                                                               | ROS stress survival     | Induced with 250 µM juglone                                                          |                                                               |                                                               |                   |           |                   |                   | Improved  |                             |          |        |
|                                                                                   |                                   |                                                                                       |                                                     |                                                                                                                    |                                                                                                                                                                                                                                                                                                  |                                                               | ROS levels              | Measurement of intracellular dichlorofluorescein fluorescence with spectrophotometer |                                                               |                                                               |                   |           |                   |                   | Improved  |                             |          |        |
| <i>Nymphaea x hybrida</i>                                                         | Nymphaeaceae                      | Roots                                                                                 | Aqueous                                             | Crude extract                                                                                                      | n.d.                                                                                                                                                                                                                                                                                             | n.d.                                                          | n.d.                    | 0.2, 1 and 5 mg/ml <sup>110</sup>                                                    | Lifespan                                                      | Mean lifespan                                                 | N2                | L4        | OP50              | Solid agar        | n.d.      | 0% DMSO                     | Improved | daf-16 |
|                                                                                   |                                   |                                                                                       | Hydroethanolic (70%)                                | Fraction obtained after SPE with HPD-400 macroporous adsorption resin and elution with 60% ethanol                 | n.d.                                                                                                                                                                                                                                                                                             | n.d.                                                          | n.d.                    | 100 µg/mL <sup>110</sup>                                                             | Lifespan                                                      | Mean lifespan                                                 |                   |           |                   |                   |           |                             | N2       |        |
|                                                                                   |                                   | Locomotion                                                                            | Number of body bends                                | Improved                                                                                                           |                                                                                                                                                                                                                                                                                                  |                                                               |                         |                                                                                      |                                                               |                                                               |                   |           |                   |                   |           |                             |          |        |
|                                                                                   |                                   | Thermal stress resistance                                                             | Induced with 35°C                                   | Improved                                                                                                           |                                                                                                                                                                                                                                                                                                  |                                                               |                         |                                                                                      |                                                               |                                                               |                   |           |                   |                   |           |                             |          |        |
| ROS stress survival                                                               | Induced with 0.1 mg/ml paraquat   | Improved                                                                              |                                                     |                                                                                                                    |                                                                                                                                                                                                                                                                                                  |                                                               |                         |                                                                                      |                                                               |                                                               |                   |           |                   |                   |           |                             |          |        |

|                             |                |                      |                                                      |                                                                                      |                                                                     |         |                                                                                        |                                              | Lifespan                        | Mean lifespan                                                                   |        |                     |                     |                                    |                                                 |            |           |          | Improved |  |  |  |  |  |  |           |             |
|-----------------------------|----------------|----------------------|------------------------------------------------------|--------------------------------------------------------------------------------------|---------------------------------------------------------------------|---------|----------------------------------------------------------------------------------------|----------------------------------------------|---------------------------------|---------------------------------------------------------------------------------|--------|---------------------|---------------------|------------------------------------|-------------------------------------------------|------------|-----------|----------|----------|--|--|--|--|--|--|-----------|-------------|
|                             |                |                      |                                                      |                                                                                      |                                                                     |         |                                                                                        |                                              | Thermal stress resistance       | Induced with 35°C                                                               |        |                     |                     |                                    |                                                 |            |           |          | Improved |  |  |  |  |  |  |           |             |
| <i>Nymphaea tetragona</i>   | Flowers        | Hydroethanolic (80%) | Crude extract                                        | Total phenols, total flavonoids, total terpenes, total antioxidants                  | n.d.                                                                | n.d.    | 50 mg/mL <sup>24</sup>                                                                 | ROS stress survival                          | Induced with 0.1 mg/ml paraquat | N2                                                                              | L4     | UV inactivated OP50 | Solid agar          | Added onto the surfaces of the NGM | n.d.                                            | Improved   | Improved  | Improved |          |  |  |  |  |  |  |           |             |
|                             |                |                      |                                                      |                                                                                      |                                                                     |         |                                                                                        | Lifespan                                     | Mean and Median Lifespan        |                                                                                 |        |                     |                     |                                    |                                                 |            |           |          | TJ356    |  |  |  |  |  |  |           |             |
|                             |                |                      |                                                      |                                                                                      |                                                                     |         |                                                                                        | Nuclear translocation                        | DAF-16::GFP                     |                                                                                 |        |                     |                     |                                    |                                                 |            |           |          |          |  |  |  |  |  |  |           |             |
| <i>Nelumbo nucifera</i>     | Nelumbonaceae  | Flowers              | Hydroethanolic (80%)                                 | Crude extract                                                                        | Total phenols, total flavonoids, total terpenes, total antioxidants | n.d.    | n.d.                                                                                   | 50 mg/mL <sup>24</sup>                       | Lifespan                        | Mean and Median Lifespan                                                        | N2     | L4                  | UV inactivated OP50 | Solid agar                         | Added onto the surfaces of the NGM              | n.d.       | Improved  | n.d.     |          |  |  |  |  |  |  |           |             |
| <i>Schisandra chinensis</i> | Schisandraceae | Fruits               | Butyl-methyl ether - methanol                        | Combined crude extracts of (1) butyl-methyl ether (MTBE) - methanol and (2) methanol | n.d.                                                                | HPLC-MS | n.d.                                                                                   | 30 µg/ml <sup>49</sup>                       | Thermal stress survival         | Induced with 37°C                                                               | N2     | L4                  | OP50                | Solid NGM agar                     | added to the NGM agar plates                    | 0.05% DMSO | Improved  | n.d.     |          |  |  |  |  |  |  |           |             |
| <i>Michelia alba</i>        | Magnoliaceae   | Flowers (petals)     | Hydroethanolic (80%)                                 | Crude extract                                                                        | Total antioxidants                                                  | n.d.    | n.d.                                                                                   | 50 mg/mL <sup>24</sup>                       | Lifespan                        | Mean and median lifespan                                                        | N2     | L4                  | UV inactivated OP50 | Solid agar                         | Added onto the surfaces of the NGM              | n.d.       | No effect | n.d.     |          |  |  |  |  |  |  |           |             |
| <i>Lindera obtusiloba</i>   | Lauraceae      | Branches             | Methanol                                             | Crude extract                                                                        | n.d.                                                                | n.d.    | n.d.                                                                                   | 125, 250 and 500 µg/mL <sup>111</sup>        | Lifespan                        | Mean and maximum lifespan                                                       | N2     | L1                  | OP50                | Solid agar                         | inserted into autoclaved NGM                    | n.d.       | Improved  | Improved |          |  |  |  |  |  |  |           |             |
|                             |                |                      |                                                      |                                                                                      |                                                                     |         |                                                                                        |                                              | Locomotion                      | Movement speed                                                                  |        |                     |                     |                                    |                                                 |            |           |          |          |  |  |  |  |  |  |           |             |
|                             |                |                      |                                                      |                                                                                      |                                                                     |         |                                                                                        |                                              | Pharyngeal pumping              | Pumping rate                                                                    |        |                     |                     |                                    |                                                 |            |           |          |          |  |  |  |  |  |  | No effect |             |
|                             |                |                      |                                                      |                                                                                      |                                                                     |         |                                                                                        |                                              | Thermal stress survival         | Induced with 36°C                                                               |        |                     |                     |                                    |                                                 |            |           |          |          |  |  |  |  |  |  |           | Detrimental |
|                             |                |                      |                                                      |                                                                                      |                                                                     |         |                                                                                        |                                              | ROS stress survival             | Induced 60 mM paraquat                                                          |        |                     |                     |                                    |                                                 |            |           |          |          |  |  |  |  |  |  |           | Improved    |
|                             |                |                      |                                                      |                                                                                      |                                                                     |         |                                                                                        |                                              | Hypertonic stress survival      | Induced with 500 mM NaCl                                                        |        |                     |                     |                                    |                                                 |            |           |          |          |  |  |  |  |  |  |           | Improved    |
| <i>Dioscorea alata</i>      | Dioscoreaceae  | Tuber                | Hydroethanolic                                       | Crude extract                                                                        | Total phenols, total tannins, total antioxidants                    | GC-MS   | Several compounds tentatively identified with GC-MS including fatty acid methyl esters | 100, 200, 300, 400, 500 µg/mL <sup>112</sup> | Lifespan                        | Mean lifespan                                                                   | N2     | L1                  | OP50                | Solid agar                         | Contained in OP50                               | 0.5% EtOH  | Improved  | Improved |          |  |  |  |  |  |  |           |             |
|                             |                |                      |                                                      |                                                                                      |                                                                     |         |                                                                                        |                                              | thermal stress survival         | Induced with 35°C                                                               |        |                     |                     |                                    |                                                 |            |           |          |          |  |  |  |  |  |  |           |             |
|                             |                |                      |                                                      |                                                                                      |                                                                     |         |                                                                                        |                                              | ROS stress survival             | Induced with 500 µM juglone                                                     |        |                     |                     |                                    |                                                 |            |           |          |          |  |  |  |  |  |  | Improved  |             |
|                             |                |                      |                                                      |                                                                                      |                                                                     |         |                                                                                        |                                              | ROS levels                      | Measurement of intracellular dichlorofluorescein fluorescence with plate reader |        |                     |                     |                                    |                                                 |            |           |          |          |  |  |  |  |  |  |           | Improved    |
|                             |                |                      |                                                      |                                                                                      |                                                                     |         |                                                                                        |                                              | Nuclear translocation           | HSF-1::GFP                                                                      | CF1824 |                     |                     |                                    |                                                 |            |           |          |          |  |  |  |  |  |  |           | No effect   |
|                             |                |                      |                                                      |                                                                                      |                                                                     |         |                                                                                        |                                              | Proteotoxicity                  | YFP tagged $\alpha$ -synuclein expression in muscles, Microscopy                | NL5901 |                     |                     |                                    |                                                 |            |           |          |          |  |  |  |  |  |  |           | Improved    |
| <i>Alpinia zerumbet</i>     | Zingiberaceae  | Leaves               | Aqueous                                              | Crude extract                                                                        | Total phenols                                                       | n.d.    | n.d.                                                                                   | 62.5, 125, and 250 µg/mL <sup>53</sup>       | ROS stress survival             | Induced with 0.5mM H <sub>2</sub> O <sub>2</sub>                                | N2     | L1                  | OP50                | Solid agar                         | Diluted in liquid agar before pouring to plates | 0% DMSO    | Improved  | Improved |          |  |  |  |  |  |  |           |             |
|                             |                |                      |                                                      |                                                                                      |                                                                     |         |                                                                                        |                                              | Thermal stress survival         | Induced with 35°C                                                               |        |                     |                     |                                    |                                                 |            |           |          |          |  |  |  |  |  |  |           |             |
|                             |                | Hydroethanolic       | Aqueous fraction after liquid-liquid separation with | Total phenols                                                                        | n.d.                                                                | n.d.    | 25, 50 and 100 µg/ml <sup>53</sup>                                                     | Lifespan elongation                          | Mean lifespan                   | N2                                                                              | L1     | OP50                | Solid agar          | Diluted in liquid                  | 0% DMSO                                         | Improved   | Improved  |          |          |  |  |  |  |  |  |           |             |

|                            |           |          |                            |                                                                                                                                             |                                                       |                            |                                                                                                                                                                       |                                           |                                                                                                                                                             |                                                                                                                                                                                                                                                                                                        |            |                    |                           |                                    |                                                                          |         |                                                                        |                       |
|----------------------------|-----------|----------|----------------------------|---------------------------------------------------------------------------------------------------------------------------------------------|-------------------------------------------------------|----------------------------|-----------------------------------------------------------------------------------------------------------------------------------------------------------------------|-------------------------------------------|-------------------------------------------------------------------------------------------------------------------------------------------------------------|--------------------------------------------------------------------------------------------------------------------------------------------------------------------------------------------------------------------------------------------------------------------------------------------------------|------------|--------------------|---------------------------|------------------------------------|--------------------------------------------------------------------------|---------|------------------------------------------------------------------------|-----------------------|
|                            |           |          |                            | hexane and ethylacetate                                                                                                                     |                                                       |                            |                                                                                                                                                                       | 2, 5, and 10 µg/mL <sup>53</sup>          | ROS stress survival<br>Thermal stress survival                                                                                                              | Induced with 0.5mM H <sub>2</sub> O <sub>2</sub><br>Induced with 35 °C                                                                                                                                                                                                                                 |            |                    |                           |                                    | agar before pouring to plates                                            |         | Improved<br>Improved                                                   |                       |
| <i>Imperata cylindrica</i> | Poaceae   | Rhizomes | dichloromethane – methanol | Lead-like enhanced extract: Combined dichloromethane and methanol extracts of degreased (hexane) material, tannin depleted by polyamide SPE | n.d.                                                  | n.d.                       | n.d.                                                                                                                                                                  | 25 and 100 µg/ml <sup>2</sup>             | Lifespan                                                                                                                                                    | Death Time 50 (DT50)                                                                                                                                                                                                                                                                                   | N2         | L4                 | OP50                      | S medium                           | Diluted in liquid                                                        | 1% DMSO | No effect                                                              | n.d.                  |
| <i>Triticum aestivum</i>   |           | Seeds    | Methanol/Hcl (85:15, v/v)  | Crude extract                                                                                                                               | Total anthocyanins                                    | HPLC-UV                    | Several constituents identified and quantified with RP-HPLC-UV and anthocyanin standards (cyanidin-3-O glucoside 11 peonidin-3O glucoside 12 malvidin-3O galactoside) | 10, 50 100 µg/mL <sup>113</sup>           | Lifespan elongation<br>ROS levels<br>Nuclear translocation                                                                                                  | Mean life span<br>Measurement of intracellular dichlorofluorescein fluorescence with plate reader<br>DAF-16::GFP                                                                                                                                                                                       | N2         | A<br>L1<br>L2      | OP50                      | Solid agar<br>S Medium             | Extracts in E. coli                                                      | 0% DMSO | Improved<br>Improved<br>Improved                                       | DAF-16                |
| <i>Euterpe precatoria</i>  | Arecaceae | Fruits   | Aqueous                    | Crude extract                                                                                                                               | Total anthocyanins, total antioxidants                | HPLC-MS <sup>2</sup>       | Cyanidin 3-O-glucoside and cyanidin 3-O-rutinoside were quantified by HPLC-MS <sup>2</sup>                                                                            | 100 mg/ml <sup>114</sup>                  | Lifespan<br>Thermal stress survival<br>ROS stress survival<br>Hypertonic stress survival<br>Antioxidant capacity<br>Nuclear translocation<br>Proteotoxicity | n.d.<br>Induced with 35°C<br>Induced with 7.5 mM tert-butyl hydrogen peroxide<br>Induced with 500 mM NaCl<br>Measurement of dichlorofluorescein fluorescence after treatment with H <sub>2</sub> O <sub>2</sub><br>DAF-16::GFP<br>YFP tagged polyglutamine in muscles; microscopy and image Processing | BA17<br>N2 | L1                 | OP50<br>Dead OP50<br>OP50 | Solid agar                         | mixed with OP50 before spreading to NGM                                  | 0% DMSO | No effect<br>No effect<br>Improved<br>Improved<br>Improved<br>Improved | daf-16, osr-1, unc-43 |
|                            |           |          | Hydro methanolic (80%)     | Crude extract                                                                                                                               | Total phenols, total antioxidants, Total anthocyanins | HPLC-UV/VIS                | cyanidin-3-rutinoside was quantified using HPLC-UV/VIS                                                                                                                | 50, 100, 200 and 300 µg/mL <sup>115</sup> | Lifespan elongation<br>Pharyngeal pumping<br>ROS stress survival<br>ROS levels<br>Autofluorescence<br>Nuclear translocation                                 | Mean life span<br>Pumping rate<br>Induced with 80 µM juglone<br>Measurement of intracellular dichlorofluorescein fluorescence<br>Microscopy + Image Processing<br>Filter (360/460 nm); microscopy and image processing<br>DAF-16::GFP                                                                  | N2         | A<br>L1<br>A<br>L1 | OP50                      | S Medium<br>Solid agar<br>S medium | Diluted in liquid<br>Supplemented to bacterial lawn<br>Diluted in liquid | 0% DMSO | No effect<br>Improved<br>Improved<br>Improved<br>Improved              | DAF-16                |
| <i>Landoltia punctata</i>  |           | Thallus  | Hydro methanolic (70%)     | Crude extract                                                                                                                               | Total antioxidants                                    | HPLC-MS <sup>2</sup> , NMR | Bioactivity-guided fractionation led to the isolation of 5 compounds (apigenin 6-C-[β-D-apiofuranosyl-(1 → 2)]β-D-glucopyranosidated,                                 | 2 and 20 µg/ml <sup>58</sup>              | Thermal stress survival<br>ROS stress survival<br>ROS levels                                                                                                | Induced with 37 °C<br>Induced with 250 µM juglone<br>Measurement of                                                                                                                                                                                                                                    | N2         | L1                 | UV inactivated W3110      | S medium                           | Diluted in liquid                                                        | 1% DMSO | Improved<br>Improved<br>Improved                                       | n.d.                  |

|                             |                |         |                      |                                                                                      |                                                                     |                      |                                                                                                                                                                                                                                                                                                                                                                                                                                                       |                        |          |                                                |    |    |                     |                                                |                                    |                            |           |      |
|-----------------------------|----------------|---------|----------------------|--------------------------------------------------------------------------------------|---------------------------------------------------------------------|----------------------|-------------------------------------------------------------------------------------------------------------------------------------------------------------------------------------------------------------------------------------------------------------------------------------------------------------------------------------------------------------------------------------------------------------------------------------------------------|------------------------|----------|------------------------------------------------|----|----|---------------------|------------------------------------------------|------------------------------------|----------------------------|-----------|------|
|                             |                |         |                      |                                                                                      |                                                                     |                      | quercetin 3-O-β-D-apiofuranoside (3), luteolin 6-C-[β-D-apiofuranosyl-(1 → 2)]-β-D-glucopyranoside (2), apigenin 6-C-β-D-glucopyranoside and luteolin 7-O-neohespiroside)<br>24 flavone glycosides were tentatively identified LC-MS <sup>2</sup>                                                                                                                                                                                                     |                        |          | intracellular dichlorofluorescein fluorescence |    |    |                     |                                                |                                    |                            |           |      |
| <i>Dendrobium candidum</i>  | Orchidaceae    | Flowers | Hydroethanolic (80%) | Crude extract                                                                        | Total phenols, total flavonoids, total terpenes, total antioxidants | n.d.                 | n.d.                                                                                                                                                                                                                                                                                                                                                                                                                                                  | 50 mg/mL <sup>24</sup> | Lifespan | Mean and Median Lifespan                       | N2 | L4 | UV inactivated OP50 | Solid agar                                     | Added onto the surfaces of the NGM | n.d.                       | Improved  | n.d. |
| <i>Crocus sativus</i>       | Iridaceae      | Flowers | Hydroethanolic (80%) | Crude extract                                                                        | Total antioxidants                                                  | n.d.                 | n.d.                                                                                                                                                                                                                                                                                                                                                                                                                                                  | 50 mg/mL <sup>24</sup> | Lifespan | Mean and median lifespan                       | N2 | L4 | UV inactivated OP50 | Solid agar                                     | Added onto the surfaces of the NGM | n.d.                       | No effect | n.d. |
| <i>Allium cepa</i>          | Amaryllidaceae | Bulbus  | Hydroethanolic       | Crude extract of fermented juice (which was lyophilized and degreased with (hexane)) | Total phenols, total flavonoids, total antioxidants                 | HPLC-MS <sup>2</sup> | 26 compounds tentatively identified with HPLC-MS <sup>2</sup> (quercetin, homovanillic acid, N-malayamycin, phenprobamate, p-coumaric acid, allopurinol, 4-hydroxyacetophenone, protocatechuic acid, seriniquinone, isorhamnetin, hydroquinone, echinopsine, cinnamic acid, camptothecin, protirelin, picrocrocine, nifurazole, gallic acid, 6-gingerol, camalexin, asimadolone, anthranilic acid, engeletin, catechin, caffeic acid 3-O-glucuronide) | n.d. <sup>50</sup>     | Lifespan | n.d.                                           | N2 | L4 | OP50                | Solid agar supplemented with 10–15 mM glucoses | Seeded with NGM to plates          | n.d. concentration of DMSO | Improved  | n.d. |
|                             |                |         | Hydroethanolic       | Crude extract of juice (which was lyophilized and degreased with (hexane))           | Total phenols, total flavonoids, total antioxidants                 | HPLC-MS <sup>2</sup> | 26 compounds tentatively identified with HPLC-MS <sup>2</sup> (quercetin, homovanillic acid, N-malayamycin, phenprobamate, p-coumaric acid, allopurinol, 4-hydroxyacetophenone, protocatechuic acid, seriniquinone, isorhamnetin, hydroquinone, echinopsine, cinnamic acid, camptothecin, protirelin, picrocrocine, nifurazole, gallic acid, 6-gingerol, camalexin, asimadolone, anthranilic acid, engeletin, catechin, caffeic acid 3-O-glucuronide) | n.d. <sup>50</sup>     | Lifespan | n.d.                                           | N2 | L4 | OP50                | Solid agar supplemented with 10–15 mM glucoses | Seeded with NGM to plates          | n.d. concentration of DMSO | No effect | n.d. |
| <i>Hemerocallis citrina</i> | Liliaceae      | Flowers | Hydroethanolic (80%) | Crude extract                                                                        | Total antioxidants                                                  | n.d.                 | n.d.                                                                                                                                                                                                                                                                                                                                                                                                                                                  | 50 mg/mL <sup>24</sup> | Lifespan | Mean and Median Lifespan                       | N2 | L4 | UV inactivated OP50 | Solid agar                                     | Added onto the surfaces of         | n.d.                       | No effect | n.d. |

|                                             |                                            |                  |                       |                                                                                                                   |                                                                     |         |                                                                                                                                                                      |                                       |                                   |                                                                                           |        |    |                     |            |                                    |         |           |               |         |                                                                                    |
|---------------------------------------------|--------------------------------------------|------------------|-----------------------|-------------------------------------------------------------------------------------------------------------------|---------------------------------------------------------------------|---------|----------------------------------------------------------------------------------------------------------------------------------------------------------------------|---------------------------------------|-----------------------------------|-------------------------------------------------------------------------------------------|--------|----|---------------------|------------|------------------------------------|---------|-----------|---------------|---------|------------------------------------------------------------------------------------|
| <i>Lilium brownii</i> var. <i>viridulum</i> |                                            | Flowers (petals) | Hydroethanolic (80%)  | Crude extract                                                                                                     | Total antioxidants                                                  | n.d.    | n.d.                                                                                                                                                                 | 50 mg/mL <sup>24</sup>                | Lifespan                          | Mean and Median Lifespan                                                                  | N2     | L4 | UV inactivated OP50 | Solid agar | Added onto the surfaces of the NGM | n.d.    | No effect | n.d.          |         |                                                                                    |
| <i>Epimedium sagittatum</i>                 | Berberidaceae                              | n.d.             | Hydroethanolic (75%)  | Flavonoid fraction obtained by SPE with macroporous resin (D101), washing with water and elution with 70% ethanol | n.d.                                                                | n.d.    | n.d.                                                                                                                                                                 | 100, 50, and 25 mg/L <sup>116</sup>   | Lifespan                          | Median lifespan                                                                           | N2     | L4 | OP50                | Solid agar | added to the NGM                   | 1% DMSO | Improved  | daf-16        |         |                                                                                    |
|                                             |                                            |                  |                       |                                                                                                                   |                                                                     |         |                                                                                                                                                                      |                                       | Locomotion                        | Number of body bends                                                                      |        |    |                     |            |                                    |         | Improved  |               |         |                                                                                    |
|                                             |                                            |                  |                       |                                                                                                                   |                                                                     |         |                                                                                                                                                                      |                                       | Thermal stress survival           | Induced with 35 °C                                                                        |        |    |                     |            |                                    |         | Improved  |               |         |                                                                                    |
|                                             |                                            |                  |                       |                                                                                                                   |                                                                     |         |                                                                                                                                                                      |                                       | ROS stress survival               | Induced with 16 mM H <sub>2</sub> O <sub>2</sub>                                          |        |    |                     |            |                                    |         | Improved  |               |         |                                                                                    |
|                                             |                                            |                  |                       |                                                                                                                   |                                                                     |         |                                                                                                                                                                      |                                       | Proteotoxicity                    | Paralysis assay with temperature-dependent amyloid beta expression in muscles             | CL4176 | L3 | Improved            |            |                                    |         |           |               |         |                                                                                    |
|                                             |                                            |                  |                       |                                                                                                                   |                                                                     |         |                                                                                                                                                                      |                                       |                                   | Paralysis assay with constitutive age-dependent YFP::polyglutamine aggregation in muscles | AM140  | L4 | Improved            |            |                                    |         |           |               |         |                                                                                    |
|                                             |                                            |                  |                       |                                                                                                                   |                                                                     |         |                                                                                                                                                                      |                                       | Nuclear translocation             | DAF-16::GFP                                                                               | TJ356  |    | Improved            |            |                                    |         |           |               |         |                                                                                    |
| <i>Trollius chinensis</i>                   | Ranunculaceae                              | Flowers          | Hydroethanolic (80%)  | Crude extract                                                                                                     | Total phenols, total flavonoids, total terpenes, total antioxidants | n.d.    | n.d.                                                                                                                                                                 | 50 mg/mL <sup>24</sup>                | Lifespan                          | Mean and Median Lifespan                                                                  | N2     | L4 | UV inactivated OP50 | Solid agar | Added onto the surfaces of the NGM | n.d.    | Improved  | n.d.          |         |                                                                                    |
| <i>Paeonia suffruticosa</i>                 |                                            | Flowers (petals) | Hydroethanolic (80%)  | Crude extract                                                                                                     | Total antioxidants                                                  | n.d.    | n.d.                                                                                                                                                                 | 50 mg/mL <sup>24</sup>                | Lifespan                          | Mean and Median Lifespan                                                                  | N2     | L4 | UV inactivated OP50 | Solid agar | Added onto the surfaces of the NGM | n.d.    | No effect | n.d.          |         |                                                                                    |
| <i>Rhodiola sp.</i>                         | Crassulaceae                               | Rhizomes         | Aqueous acetone (80%) | Crude extract                                                                                                     | Total phenols, total flavonoids                                     | HPLC-UV | Several constituents were tentatively identified by HPLC-UV (e.g. gallic acid, epigallocatechin, catechin, chlorogenic acid, caffeic acid, epigallocatechin gallate) | 240, 320 and 480 µg/mL <sup>117</sup> | Lifespan                          | Mean and median lifespan                                                                  | N2     | L4 | OP50                | Solid agar | Diluted in OP50                    | n.d.    | Improved  | daf-16, skn-1 |         |                                                                                    |
|                                             |                                            |                  |                       |                                                                                                                   |                                                                     |         |                                                                                                                                                                      |                                       | Pharyngeal pumping                | Pumping rate                                                                              |        |    |                     |            |                                    |         | Improved  |               |         |                                                                                    |
|                                             |                                            |                  |                       |                                                                                                                   |                                                                     |         |                                                                                                                                                                      |                                       | Locomotion                        | Motility classes                                                                          |        |    |                     |            |                                    |         | Improved  |               |         |                                                                                    |
|                                             |                                            |                  |                       |                                                                                                                   |                                                                     |         |                                                                                                                                                                      |                                       | Autofluorescence                  | Microscopy + image processing (n.d. filter)                                               |        |    |                     |            |                                    |         | Improved  |               |         |                                                                                    |
|                                             |                                            |                  |                       |                                                                                                                   |                                                                     |         |                                                                                                                                                                      |                                       | thermal stress survival           | Induced with 35 °C                                                                        |        |    |                     |            |                                    |         | Improved  |               |         |                                                                                    |
|                                             |                                            |                  |                       |                                                                                                                   |                                                                     |         |                                                                                                                                                                      |                                       | UV stress survival                | Induced with UV-B 1200 J/m <sup>2</sup>                                                   |        |    |                     |            |                                    |         | Improved  |               |         |                                                                                    |
|                                             |                                            |                  |                       |                                                                                                                   |                                                                     |         |                                                                                                                                                                      |                                       | ROS stress survival               | Induced with 125 mM paraquat                                                              |        |    |                     |            |                                    |         | Improved  |               |         |                                                                                    |
|                                             |                                            |                  |                       |                                                                                                                   |                                                                     |         |                                                                                                                                                                      |                                       | Nuclear translocation             | DAF-16::GFP                                                                               |        |    |                     |            |                                    |         | TJ356     |               |         | Improved                                                                           |
|                                             |                                            |                  |                       |                                                                                                                   |                                                                     |         |                                                                                                                                                                      |                                       |                                   | SKN-1::GFP                                                                                |        |    |                     |            |                                    |         | LG340     |               |         | Improved                                                                           |
|                                             |                                            |                  |                       |                                                                                                                   |                                                                     |         |                                                                                                                                                                      |                                       | <i>Graptopetalum paraguayense</i> |                                                                                           |        |    |                     |            |                                    |         | Leaves    |               | Ethanol | Fraction obtained by Sephadex LH-20 gel filtration chromatography of crude extract |
| Locomotion                                  | Number of body bends                       | AM140            | L4                    | Improved                                                                                                          |                                                                     |         |                                                                                                                                                                      |                                       |                                   |                                                                                           |        |    |                     |            |                                    |         |           |               |         |                                                                                    |
|                                             |                                            | N2               | n.d.                  | Improved                                                                                                          |                                                                     |         |                                                                                                                                                                      |                                       |                                   |                                                                                           |        |    |                     |            |                                    |         |           |               |         |                                                                                    |
| Autophagy                                   | GFP::LGG-1 marked autophagic vesicles were | DA2123           | L1                    | Improved                                                                                                          |                                                                     |         |                                                                                                                                                                      |                                       |                                   |                                                                                           |        |    |                     |            |                                    |         |           |               |         |                                                                                    |

|                              |                 |                 |                      |                                                                                                                                                                               |                                                    |             |                                                                                                                                                                                                                                                                                                                                             |                                               |                            |                                                                                            |                             |       |                       |                |                              |            |             |                                                              |
|------------------------------|-----------------|-----------------|----------------------|-------------------------------------------------------------------------------------------------------------------------------------------------------------------------------|----------------------------------------------------|-------------|---------------------------------------------------------------------------------------------------------------------------------------------------------------------------------------------------------------------------------------------------------------------------------------------------------------------------------------------|-----------------------------------------------|----------------------------|--------------------------------------------------------------------------------------------|-----------------------------|-------|-----------------------|----------------|------------------------------|------------|-------------|--------------------------------------------------------------|
| <i>Penthorum chinense</i>    | Penthoraceae    | n.d.            | hydroethanolic       | Flavonoid enriched fraction (generated with DM130 macroporous resins column)                                                                                                  | Total phenols, total flavonoid, total antioxidants | HPLC-MS     | Several compounds tentatively identified using HPLC-MS (e.g. quercetin-3-O-xyloside, quercetin-3-O-rhamnoside, kaempferol, kaempferol-3-O-rhamnoside, quercetin, pinocembrin-7-O-glucoside, pinocembrin dihydrochalcone-7-O-[4", 6"-HHDP]-glucoside, pinocembrin dihydrochalcone-7-O-[3"-O-galloyl-4", 6"-HHDP]-glucoside, thoningianins A) | 0.1 mg/mL <sup>119</sup>                      | thermal stress survival    | Induced with 35 °C                                                                         | N2                          | L4    | OP0                   | Solid agar     | n.d.                         | 0.05% DMSO | Improved    | n.d.                                                         |
| <i>Ribes fasciculatum</i>    | Grossulariaceae | Stems and twigs | Methanol             | Ethyl acetate fraction prepared as followed: Crude extract was suspended with distilled water, extracted three times with hexane, dichloromethane and ethyl acetate           | n.d.                                               | n.d.        | n.d.                                                                                                                                                                                                                                                                                                                                        | 125, 250, and 500 µg/mL <sup>120</sup>        | Lifespan                   | Mean and maximum lifespan                                                                  | N2                          | L1    | OP50                  | Solid agar     | inserted into autoclaved NGM | 0.1% DMSO  | Improved    | <i>daf-2, age-1, sir-2.1, and daf-16</i>                     |
|                              |                 |                 |                      |                                                                                                                                                                               |                                                    |             |                                                                                                                                                                                                                                                                                                                                             |                                               | Pharyngeal pumping         | Pumping rate                                                                               |                             |       |                       |                |                              |            | Detrimental |                                                              |
|                              |                 |                 |                      |                                                                                                                                                                               |                                                    |             |                                                                                                                                                                                                                                                                                                                                             |                                               | Autofluorescence           | Microscopy and image processing (n.d. filter)                                              |                             |       |                       |                |                              |            | Improved    |                                                              |
|                              |                 |                 |                      |                                                                                                                                                                               |                                                    |             |                                                                                                                                                                                                                                                                                                                                             |                                               | Thermal stress survival    | Induced with 36°C                                                                          |                             |       |                       |                |                              |            | Improved    |                                                              |
|                              |                 |                 |                      |                                                                                                                                                                               |                                                    |             |                                                                                                                                                                                                                                                                                                                                             |                                               | ROS stress survival        | Induced 60 mM paraquat                                                                     |                             |       |                       |                |                              |            | Improved    |                                                              |
|                              |                 |                 |                      |                                                                                                                                                                               |                                                    |             |                                                                                                                                                                                                                                                                                                                                             |                                               | Hypertonic stress survival | Induced with 500 mM NaCl                                                                   |                             |       |                       |                |                              |            | Improved    |                                                              |
|                              |                 |                 |                      |                                                                                                                                                                               |                                                    |             |                                                                                                                                                                                                                                                                                                                                             |                                               | Antioxidant capacity       | Measurement of intracellular dichlorofluorescein fluorescence after treatment with juglone |                             |       |                       |                |                              |            | Improved    |                                                              |
| <i>Vitis vinifera</i>        | Vitaceae        | Fruit pomace    | Methanol             | Fraction generated as followed: Hydromethanolic crude extract dried and separated between water and hexane; RP-SPE was performed with aqueous phase, the MeOH eluent was used | Total antioxidants                                 | HPLC-DAD-MS | Several constituents identified and quantified with RP-HPLC-UV and standards (e.g. catechin, epicatechine gallate, procyanidin B1-B4, procyanidin B2 3-O-gallate, quercetin-3-O glycosides)                                                                                                                                                 | 100 and 300 µg/mL <sup>51</sup>               | Thermal stress survival    | Induced with 35 °C                                                                         | N2                          | L1    | heat-inactivated OP50 | Solid agar     | Diluted in agar              | 0.1% DMSO  | Improved    | n.d.                                                         |
|                              |                 |                 |                      |                                                                                                                                                                               |                                                    |             |                                                                                                                                                                                                                                                                                                                                             |                                               | ROS levels                 | Measurement of intracellular dichlorofluorescein fluorescence                              |                             |       |                       |                |                              |            | Improved    |                                                              |
| <i>Glycyrrhiza glabra</i>    | Fabaceae        | Roots           | Ethanol              | Crude extract (Soxhlet)                                                                                                                                                       | Total antioxidants                                 | HPLC-UV     | 1.18% glycyrrhizinic acid content was quantified with HPLC-UV                                                                                                                                                                                                                                                                               | 25, 50, 100, 250 and 500 µg/mL <sup>121</sup> | Lifespan                   | Mean lifespan                                                                              | SS104                       | A     | OP50                  | Solid agar     | n.d.                         | n.d.       | Improved    | n.d.                                                         |
|                              |                 |                 |                      |                                                                                                                                                                               |                                                    |             |                                                                                                                                                                                                                                                                                                                                             |                                               |                            | ROS stress survival                                                                        | Induced with 150 mM juglone | N2    |                       |                |                              |            | L1          |                                                              |
| <i>Glycyrrhiza uralensis</i> |                 | Roots           | Hydroethanolic (70%) | Crude extract                                                                                                                                                                 | n.d.                                               | HPLC-UV     | HPLC-UV quantification of 4 standards (Iiquiritin, Iiquiritigenin, Iisoliquiritigenin, glycyrrhizic acid)                                                                                                                                                                                                                                   | 1 mg/ml <sup>44</sup>                         | Lifespan                   | T <sub>50</sub>                                                                            | NL5901                      | Adult | OP50                  | Solid NGM agar | n.d.                         | 4% DMSO    | Improved    | No effect                                                    |
|                              |                 |                 |                      |                                                                                                                                                                               |                                                    |             |                                                                                                                                                                                                                                                                                                                                             |                                               | Proteotoxicity             | YFP tagged α-synuclein expression in muscles, Microscopy                                   |                             |       |                       |                |                              |            | No effect   |                                                              |
| <i>Glycyrrhiza sp.</i>       |                 | Roots           | Aqueous              | Crude extract (decoct)                                                                                                                                                        | n.d.                                               | HPLC-UV     | Liquiritin, isoliquiritin and glycyrrhizinic acid were identified with RP-HPLC-UV and comparison to standards                                                                                                                                                                                                                               | 120 – 240 mg/ml <sup>122</sup>                | Lifespan elongation        | Mean lifespan                                                                              | N2                          | L1    | OP50                  | M9             | Diluted in liquid            | 0% DMSO    | Improved    | <i>daf-2, pdk-1, daf-18, daf-16, age-1, sgk-1, and akt-1</i> |
|                              |                 |                 |                      |                                                                                                                                                                               |                                                    |             |                                                                                                                                                                                                                                                                                                                                             |                                               | Motility                   | Number of head thrashes + body bends                                                       |                             |       |                       |                |                              |            | Improved    |                                                              |
|                              |                 |                 |                      |                                                                                                                                                                               |                                                    |             |                                                                                                                                                                                                                                                                                                                                             |                                               | Autofluorescence           | 525 nm bandpass filter; microscopy + image processing                                      |                             |       |                       |                |                              |            | Improved    |                                                              |
|                              |                 |                 |                      |                                                                                                                                                                               |                                                    |             |                                                                                                                                                                                                                                                                                                                                             |                                               | thermal stress survival    | Induced with 35 °C                                                                         |                             |       |                       |                |                              |            | Improved    |                                                              |



|                                |                  |                        |                                                                                                                                        |                                                                |                      |                                                                                                                                               |                                       |                         |                                                                                              |       |    |      |            |                              |           |           |        |                            |              |                   |          |  |                       |             |       |          |  |  |  |
|--------------------------------|------------------|------------------------|----------------------------------------------------------------------------------------------------------------------------------------|----------------------------------------------------------------|----------------------|-----------------------------------------------------------------------------------------------------------------------------------------------|---------------------------------------|-------------------------|----------------------------------------------------------------------------------------------|-------|----|------|------------|------------------------------|-----------|-----------|--------|----------------------------|--------------|-------------------|----------|--|-----------------------|-------------|-------|----------|--|--|--|
|                                |                  |                        |                                                                                                                                        |                                                                |                      | diastereomers)                                                                                                                                |                                       | Nuclear translocation   | DAF-16::GFP                                                                                  | TJ356 |    |      |            |                              |           | Improved  |        |                            |              |                   |          |  |                       |             |       |          |  |  |  |
| <i>Glycine max</i>             | Semen            | Aqueous                | Low molecular weight fraction of <i>Bacillus subtilis</i> natto T9303 fermented soy. The fraction was obtained by dialysis and C18 SPE | n.d.                                                           | n.d.                 | n.d.                                                                                                                                          | 0.5 and 1 mg/mL <sup>125</sup>        | Lifespan                | Mean lifespan                                                                                | N2    | A  | OP50 | Solid agar | n.d.                         | 0% DMSO   | Improved  | n.d.   |                            |              |                   |          |  |                       |             |       |          |  |  |  |
|                                |                  |                        |                                                                                                                                        |                                                                |                      |                                                                                                                                               |                                       | Autofluorescence        | Filter (385/ 420) microscopy and image processing                                            |       |    |      |            |                              |           | L4        |        | Diluted in liquid          | Improved     |                   |          |  |                       |             |       |          |  |  |  |
|                                |                  |                        |                                                                                                                                        |                                                                |                      |                                                                                                                                               |                                       | Thermal stress survival | Induced with 35 °C                                                                           |       |    |      |            |                              |           |           |        |                            | Improved     |                   |          |  |                       |             |       |          |  |  |  |
|                                |                  |                        |                                                                                                                                        |                                                                |                      |                                                                                                                                               |                                       | ROS stress survival     | Induced with 60 mM paraquat                                                                  |       |    |      |            |                              |           |           |        |                            | Improved     |                   |          |  |                       |             |       |          |  |  |  |
| <i>Caesalpinia sappan</i>      | Wood             | Methanol               | Crude extract                                                                                                                          | n.d.                                                           | HPLC-MS, NMR, TLC    | Bioactivity-guided fractionation                                                                                                              | 500 µg/mL <sup>56</sup>               | Lifespan                | Mean lifespan                                                                                | N2    | L1 | OP50 | Solid agar | pour ed into autoclaved NGM  | 0.1% DMSO | No effect |        |                            |              |                   |          |  |                       |             |       |          |  |  |  |
|                                |                  |                        | Dichloromethane fraction obtained by sequential liquid-liquid partition of crude methanolic extract                                    | n.d.                                                           | n.d.                 | n.d.                                                                                                                                          | 500 µg/mL <sup>56</sup>               | Lifespan                | Mean lifespan                                                                                | N2    | L1 | OP50 | Solid agar | pour ed into autoclaved NGM  | 0.1% DMSO | No effect |        |                            |              |                   |          |  |                       |             |       |          |  |  |  |
|                                |                  |                        | Ethylacetate fraction obtained by sequential liquid-liquid partition of crude methanolic extract                                       | n.d.                                                           | HPLC-MS, NMR, TLC    | Bioactivity-guided fractionation led to the isolation of brazilin by NP-LC, Sephadex LH20 and JAI-GS310 columns, characterized by NMR and MS  | 500 µg/mL <sup>56</sup>               | Lifespan                | Mean lifespan                                                                                | N2    | L1 | OP50 | Solid agar | pour ed into autoclaved NGM  | 0.1% DMSO | Improved  |        |                            |              |                   |          |  |                       |             |       |          |  |  |  |
|                                |                  |                        | Butanol fraction obtained by sequential liquid-liquid partition of crude methanolic extract                                            | n.d.                                                           | n.d.                 | n.d.                                                                                                                                          | 500 µg/mL <sup>56</sup>               | Lifespan                | Mean lifespan                                                                                | N2    | L1 | OP50 | Solid agar | pour ed into autoclaved NGM  | 0.1% DMSO | No effect |        |                            |              |                   |          |  |                       |             |       |          |  |  |  |
| <i>Caesalpinia mimosoides</i>  | Leaves and twigs | Methanol               | Crude Soxhlet extract                                                                                                                  | Total phenols, total flavonoid, total antioxidants             | HPLC-MS              | 11 compounds tentatively identified using HPLC-MS (e.g. 3-O-methylgallate, 4-aminomethylindole, emmotin A, theogallin and gallic acid)        | 25, 50 and 100 µg/mL <sup>126</sup>   | Lifespan                | Mean lifespan                                                                                | N2    | L4 | OP50 | Solid agar | Extract supplemented to OP50 | 1% DMSO   | Improved  | daf-16 |                            |              |                   |          |  |                       |             |       |          |  |  |  |
|                                |                  |                        |                                                                                                                                        |                                                                |                      |                                                                                                                                               |                                       | Autofluorescence        | microscopy + Image processing (n.d. filter)                                                  |       |    |      |            |                              |           | BA17      |        | L1                         | S-medium     | Diluted in liquid | Improved |  |                       |             |       |          |  |  |  |
|                                |                  |                        |                                                                                                                                        |                                                                |                      |                                                                                                                                               |                                       | ROS stress survival     | Induced with 80 µM juglone                                                                   |       |    |      |            |                              |           | N2        |        |                            |              |                   |          |  |                       |             |       |          |  |  |  |
|                                |                  |                        |                                                                                                                                        |                                                                |                      |                                                                                                                                               |                                       | ROS levels              | Measurement of intracellular dichlorofluorescein fluorescence; microscopy + Image Processing |       |    |      |            |                              |           |           |        |                            |              |                   |          |  |                       |             |       |          |  |  |  |
|                                |                  |                        |                                                                                                                                        |                                                                |                      |                                                                                                                                               |                                       |                         |                                                                                              |       |    |      |            |                              |           |           |        |                            |              |                   |          |  | Nuclear translocation | DAF-16::GFP | TJ356 |          |  |  |  |
|                                |                  |                        |                                                                                                                                        |                                                                |                      |                                                                                                                                               |                                       |                         | SKN-1::GFP                                                                                   | LD1   |    |      |            |                              |           |           |        |                            |              |                   |          |  |                       |             |       |          |  |  |  |
| <i>Styphnolobium japonicum</i> | Fruits           | Hydro methanolic (70%) | Crude extract                                                                                                                          | Total phenols, total antioxidants                              | HPLC-MS              | 24 compounds tentatively identified using HPLC-MS (e.g. glycosides of apigenin, kaempferol, galloyl – hexahydroxydiphenic acid and quercetin) | 100, 200, and 300 µg/mL <sup>38</sup> | ROS stress survival     | Induced with 80 µM juglone                                                                   | N2    | L1 | OP50 | Solid agar | n.d.                         | 2.1% MeOH | Improved  | n.d.   |                            |              |                   |          |  |                       |             |       |          |  |  |  |
|                                |                  |                        |                                                                                                                                        |                                                                |                      |                                                                                                                                               |                                       | ROS levels              | Measurement of intracellular dichlorofluorescein fluorescence; microscopy + image processing |       |    |      |            |                              |           |           |        |                            |              |                   |          |  |                       |             |       | Improved |  |  |  |
| <i>Dipteryx alata</i>          | Fruits           | Aqueous                | Fruit pulp homogenate                                                                                                                  | Total phenols, total antioxidants, total ascorbic acid content | HPLC-MS              | 23 compounds tentatively identified using HPLC-MS (e.g. protocatechuic acid, citric acid, vicenin-2, luteolin)                                | 500 and 1000 µg/mL <sup>127</sup>     | Lifespan                |                                                                                              | N2    | A  | OP50 | Solid agar | added to the NGM             | 0% DMSO   | Improved  | daf-16 |                            |              |                   |          |  |                       |             |       |          |  |  |  |
|                                |                  |                        |                                                                                                                                        |                                                                |                      |                                                                                                                                               |                                       | thermal stress survival | Induced with 37°C                                                                            |       |    |      |            |                              |           | n.d.      |        | inactivated with kanamycin | Not improved |                   |          |  |                       |             |       |          |  |  |  |
|                                |                  |                        |                                                                                                                                        |                                                                |                      |                                                                                                                                               |                                       | ROS stress survival     | Induced with n.d. concentration of juglone                                                   |       |    |      |            |                              |           | L1        |        |                            | Improved     |                   |          |  |                       |             |       |          |  |  |  |
|                                |                  |                        |                                                                                                                                        |                                                                |                      |                                                                                                                                               |                                       | Nuclear translocation   | DAF-16::GFP                                                                                  | TJ356 |    |      |            |                              |           |           |        |                            |              |                   |          |  |                       |             |       |          |  |  |  |
| <i>Mucuna</i>                  | Seeds            | Methanol               | Ethyl acetate fraction                                                                                                                 | n.d.                                                           | HPLC-MS <sup>2</sup> | Levodopa was quantified                                                                                                                       | 20 and 40                             | Neurotoxicity           | Survival during 1-                                                                           | N2    | L1 | OP50 | S medium   | Dilute                       | 0%        | Improved  |        |                            |              |                   |          |  |                       |             |       |          |  |  |  |



|                            |                      |                      |                                                      |                                                                                                                                                                                              |                    |                                                                                                                                                                                                                                                                                                 |                                                                                                                             |                                  |                             |                                                                                                              |    |      |                                            |                     |                                    |           |           |                      |                                                      |
|----------------------------|----------------------|----------------------|------------------------------------------------------|----------------------------------------------------------------------------------------------------------------------------------------------------------------------------------------------|--------------------|-------------------------------------------------------------------------------------------------------------------------------------------------------------------------------------------------------------------------------------------------------------------------------------------------|-----------------------------------------------------------------------------------------------------------------------------|----------------------------------|-----------------------------|--------------------------------------------------------------------------------------------------------------|----|------|--------------------------------------------|---------------------|------------------------------------|-----------|-----------|----------------------|------------------------------------------------------|
| <i>pruriens</i>            |                      |                      | nol                                                  | obtained after sequential partition of crude extract between water, n-hexanes and ethyl acetate                                                                                              |                    |                                                                                                                                                                                                                                                                                                 | with HPLC-MS <sup>2</sup> (0.02%)                                                                                           | µg/mL <sup>128</sup>             |                             | methyl-4-phenylpyridinium treatment                                                                          |    |      |                                            |                     | d in liquid                        | DMSO      |           |                      |                                                      |
| <i>Apios americana</i>     | Leaves               | Hydroethanolic (70%) | Fraction obtain after LC with AB-8 macroporous resin | n.d.                                                                                                                                                                                         | HPLC-MS            | Three compounds were identified and quantified with HPLC-MS and standards (schaftoside, orientin, vitexin)                                                                                                                                                                                      | 100 µg/mL <sup>129</sup>                                                                                                    | Lifespan                         | Mean lifespan               | N2                                                                                                           | A  | OP50 | Solid agar                                 | n.d.                | n.d.                               | Improved  | Improved  | daf-16, skn-1, pmk-1 |                                                      |
|                            |                      |                      |                                                      |                                                                                                                                                                                              |                    |                                                                                                                                                                                                                                                                                                 |                                                                                                                             | ROS stress survival              | Induced with 1 mM paraquat  |                                                                                                              |    |      | Solid agar supplemented with 50 mM glucose |                     |                                    |           |           |                      | Solid agar supplemented with 50 mM glucose           |
| <i>Aspalathus linearis</i> | Leaves and fine stem | Aqueous              | Crude extract (Green rooibos)                        | n.d.                                                                                                                                                                                         | HPLC-UV            | Several constituents identified and quantified with RP-HPLC-UV and standards (aspalathin, nothofagin, enolic phenylpyruvic acid-2-O-glucoside, orientin, isoorientin, vitexin, isovitexin, hyperoside, isoquercitrin, rutin, quercetin-3-O-robinobioside, luteolin-7-O-glucoside)               | 100 µg/mL <sup>130</sup>                                                                                                    | Lifespan                         | Mean life span              | N2                                                                                                           | A  | OP50 | Solid agar                                 | Extracts in E. coli | n.d.                               | No effect | Improved  | daf-16, sod-3        |                                                      |
|                            |                      |                      |                                                      |                                                                                                                                                                                              |                    |                                                                                                                                                                                                                                                                                                 |                                                                                                                             | ROS stress survival              | Induced with 400 µM juglone |                                                                                                              |    |      |                                            |                     |                                    |           |           |                      | Mean life span under high glucose (50 mM) conditions |
|                            |                      |                      | ROS levels                                           | Measurement of intracellular dichlorofluorescein fluorescence with plate reader                                                                                                              |                    | L1                                                                                                                                                                                                                                                                                              | Improved                                                                                                                    |                                  |                             |                                                                                                              |    |      |                                            |                     |                                    |           |           |                      |                                                      |
|                            |                      |                      |                                                      |                                                                                                                                                                                              |                    |                                                                                                                                                                                                                                                                                                 |                                                                                                                             |                                  |                             |                                                                                                              |    |      |                                            |                     |                                    |           |           |                      |                                                      |
| <i>Aspalathus linearis</i> | Leaves and fine stem | Aqueous              | Crude extract (Red rooibos)                          | n.d.                                                                                                                                                                                         | HPLC-UV/VIS        | Several constituents identified and quantified with RP-HPLC-UV and standards (aspalathin, nothofagin, enolic phenylpyruvic acid-2-O-glucoside, orientin, isoorientin, vitexin, isovitexin, hyperoside, isoquercitrin, rutin, quercetin-3-O-robinobioside, luteolin-7-O-glucoside, ferulic acid) | 100 µg/mL <sup>130</sup>                                                                                                    | Lifespan                         | Mean life span              | N2                                                                                                           | A  | OP50 | Solid agar                                 | Extracts in E. coli | n.d.                               | No effect | Improved  | daf-16, sod-3        |                                                      |
|                            |                      |                      |                                                      |                                                                                                                                                                                              |                    |                                                                                                                                                                                                                                                                                                 |                                                                                                                             | ROS stress survival              | Induced with 400 µM juglone |                                                                                                              |    |      |                                            |                     |                                    |           |           |                      | Mean life span under high glucose (50 mM) conditions |
|                            |                      |                      | ROS levels                                           | Measurement of intracellular dichlorofluorescein fluorescence with plate reader                                                                                                              |                    | L1                                                                                                                                                                                                                                                                                              | No effect                                                                                                                   |                                  |                             |                                                                                                              |    |      |                                            |                     |                                    |           |           |                      |                                                      |
|                            |                      |                      |                                                      |                                                                                                                                                                                              |                    |                                                                                                                                                                                                                                                                                                 |                                                                                                                             |                                  |                             |                                                                                                              |    |      |                                            |                     |                                    |           |           |                      |                                                      |
| <i>Sophora japonica</i>    |                      | Flowers (petals)     | Hydroethanolic (80%)                                 | Crude extract                                                                                                                                                                                | Total antioxidants | n.d.                                                                                                                                                                                                                                                                                            | n.d.                                                                                                                        | 50 mg/mL <sup>24</sup>           | Lifespan                    | Mean and Median Lifespan                                                                                     | N2 | L4   | UV inactivated OP50                        | Solid agar          | Added onto the surfaces of the NGM | n.d.      | No effect | n.d.                 |                                                      |
| <i>Lablab purpureus</i>    |                      | Flowers (petals)     | Hydroethanolic (80%)                                 | Crude extract                                                                                                                                                                                | Total antioxidants | n.d.                                                                                                                                                                                                                                                                                            | n.d.                                                                                                                        | 50 mg/mL <sup>24</sup>           | Lifespan                    | Mean and Median Lifespan                                                                                     | N2 | L4   | UV inactivated OP50                        | Solid agar          | Added onto the surfaces of the NGM | n.d.      | No effect | n.d.                 |                                                      |
| <i>Polygala sp.</i>        | Polygalaceae         | Roots                | Hydroethanolic (75%)                                 | Fraction obtained as followed: Dried crude extract was solved in MeOH and then separated with RP-18 LC and a gradient of 50 – 100% MeOH. The tested fraction was the eluent with 70-80% MeOH | n.d.               | HPLC- MS <sup>2</sup>                                                                                                                                                                                                                                                                           | 17 saponins were identified and quantified using HPLC-MS <sup>2</sup> (e.g. senegasaponins, onjisaponins, polygalasaponins) | 100 and 250 µg/mL <sup>131</sup> | Lifespan                    |                                                                                                              | N2 | L4   | heat-treated OP50                          | Solid agar          | Dissolved in S Medium with OP50    | 0% DMSO   | Improved  | Improved             | n.d.                                                 |
|                            |                      |                      |                                                      |                                                                                                                                                                                              |                    |                                                                                                                                                                                                                                                                                                 |                                                                                                                             |                                  | Locomotion                  | Number of body bends                                                                                         |    |      |                                            |                     |                                    |           |           |                      |                                                      |
|                            |                      |                      |                                                      |                                                                                                                                                                                              |                    |                                                                                                                                                                                                                                                                                                 |                                                                                                                             |                                  | Pharyngeal pumping          | Pumping rate                                                                                                 |    |      |                                            |                     |                                    |           |           |                      |                                                      |
|                            |                      |                      |                                                      |                                                                                                                                                                                              |                    |                                                                                                                                                                                                                                                                                                 |                                                                                                                             |                                  | Autofluorescence            | GFP filter; microscopy + image processing                                                                    |    |      |                                            |                     |                                    |           |           |                      |                                                      |
|                            |                      |                      |                                                      |                                                                                                                                                                                              |                    |                                                                                                                                                                                                                                                                                                 |                                                                                                                             |                                  | Antioxidant capacity        | Measurement of intracellular dichlorofluorescein fluorescence after H <sub>2</sub> O <sub>2</sub> treatment; |    |      |                                            |                     |                                    |           |           |                      |                                                      |
|                            |                      |                      | L1                                                   | OP50                                                                                                                                                                                         | Improved           |                                                                                                                                                                                                                                                                                                 |                                                                                                                             |                                  |                             |                                                                                                              |    |      |                                            |                     |                                    |           |           |                      |                                                      |

|                             |               |              |                      |               |                    |                      |                                                                                                                                                                                                              |                                      |                         |                                                                                           |        |        |      |            |                                                               |            |          |                      |  |
|-----------------------------|---------------|--------------|----------------------|---------------|--------------------|----------------------|--------------------------------------------------------------------------------------------------------------------------------------------------------------------------------------------------------------|--------------------------------------|-------------------------|-------------------------------------------------------------------------------------------|--------|--------|------|------------|---------------------------------------------------------------|------------|----------|----------------------|--|
| <i>Betula utilis</i>        | Betulaceae    | Bark         | Ethanol              | Crude extract | n.d.               | GC-MS                | Several compounds tentatively identified using GC-MS (betulin, lanost-8-en-26-oic acid, lupenone, lupeol, oleanolic acid, betulinic acid)                                                                    | 10, 50 and 100 µg/ml                 | Lifespan                | Mean lifespan                                                                             | N2     | L4     | OP50 | Solid agar | Spotted onto OP50                                             | 0.01% EtOH | Improved | hsf-1, skn-1, daf-16 |  |
|                             |               |              |                      |               |                    |                      |                                                                                                                                                                                                              |                                      | Pharyngeal pumping      | Pumping rate                                                                              |        | L1     |      |            |                                                               |            |          |                      |  |
|                             |               |              |                      |               |                    |                      |                                                                                                                                                                                                              |                                      | Thermal stress survival | Induced with 37°C                                                                         |        | A      |      |            |                                                               |            |          |                      |  |
|                             |               |              |                      |               |                    |                      |                                                                                                                                                                                                              |                                      | Autofluorescence        | DAPI filter (340–380 nm/435–485 nm) microscopy + image processing                         |        |        |      |            |                                                               |            |          |                      |  |
|                             |               |              |                      |               |                    |                      |                                                                                                                                                                                                              |                                      | ROS stress survival     | Induced with 250 µM juglone                                                               |        |        |      |            |                                                               |            |          |                      |  |
|                             |               |              |                      |               |                    |                      |                                                                                                                                                                                                              |                                      | ROS levels              | Measurement of intracellular dichlorofluorescein fluorescence                             |        | L1     |      |            |                                                               |            |          |                      |  |
|                             |               |              |                      |               |                    |                      |                                                                                                                                                                                                              |                                      | Proteotoxicity          | Paralysis assay with temperature-dependent amyloid beta expression in muscles             |        | CL4176 |      |            |                                                               |            | L4       |                      |  |
|                             |               |              |                      |               |                    |                      |                                                                                                                                                                                                              |                                      |                         | YFP tagged α-synuclein expression in muscles, Microscopy                                  |        | NL5901 |      |            |                                                               |            | A        |                      |  |
|                             |               |              |                      |               |                    |                      |                                                                                                                                                                                                              |                                      | Nuclear translocation   | DAF-16::GFP                                                                               |        | TJ356  |      |            |                                                               |            | L4       |                      |  |
| <i>Momordica charantia</i>  | Cucurbitaceae | n.d.         | hydroethanolic (80%) | Crude extract | n.d.               | HPLC-UV-MS           | 14 compounds tentatively identified using HPLC-MS (e.g. momordicosides, gonyaglycosides, momordicinenes, charantadiols and other Cucurbitan-type saponins)                                                   | 25 µg/mL <sup>132</sup>              | Lifespan                | LT50                                                                                      | N2     | L1     | OP50 | Solid agar | added to OP50, then spread onto the surface of the NGM plates | 0.1% EtOH  | Improved | n.d.                 |  |
|                             |               |              |                      |               |                    |                      |                                                                                                                                                                                                              |                                      | Motility                | body bend and head swing counts                                                           |        |        |      |            |                                                               |            |          |                      |  |
|                             |               |              |                      |               |                    |                      |                                                                                                                                                                                                              |                                      | Autofluorescence        | GFP filter, microscopy + image processing                                                 |        |        |      |            |                                                               |            |          |                      |  |
|                             |               |              |                      |               |                    |                      |                                                                                                                                                                                                              |                                      | Proteotoxicity          | Paralysis assay with constitutive age-dependent YFP::polyglutamine aggregation in muscles |        |        |      |            |                                                               |            | AM140    |                      |  |
|                             |               |              |                      |               |                    |                      |                                                                                                                                                                                                              |                                      |                         | Paralysis assay with temperature-dependent amyloid beta expression in muscles             |        |        |      |            |                                                               |            | CL4176   |                      |  |
| <i>Caryocar villosum</i>    | Caryocaraceae | Fruit shells | Hydroethanolic (80%) | Crude extract | Total antioxidants | HPLC-MS <sup>2</sup> | 25 phenols and 17 saponins were tentatively identified by LC-MS (e.g. caryocarosides, chebulic acid, gallic acid, phyllanthusin B, phyllanthusin C, ellagic acid, chebulagic acid, hexahydroxydiphenic acid) | 50, 100, and 200 µg/mL <sup>32</sup> | Lifespan                | Mean and median lifespan                                                                  | N2     | A      | OP50 | S medium   | Diluted in liquid                                             | 0% DMSO    | Improved | daf-16, skn-1        |  |
|                             |               |              |                      |               |                    |                      |                                                                                                                                                                                                              |                                      | ROS stress survival     | Induced with 80 µM juglone                                                                |        | L1     |      |            |                                                               |            |          |                      |  |
|                             |               |              |                      |               |                    |                      |                                                                                                                                                                                                              |                                      | ROS levels              | Measurement of intracellular dichlorofluorescein fluorescence                             |        |        |      |            |                                                               |            |          |                      |  |
|                             |               |              |                      |               |                    |                      |                                                                                                                                                                                                              |                                      | Nuclear translocation   | DAF-16::GFP                                                                               |        | TJ356  |      |            |                                                               |            | L4       |                      |  |
| SKN-1::GFP                  | LD1           |              |                      |               |                    |                      |                                                                                                                                                                                                              |                                      |                         |                                                                                           |        |        |      |            |                                                               |            |          |                      |  |
| <i>Cratogeomys formosum</i> | Hypericaceae  | Twigs        | Hydroethanolic (50%) | Crude extract | n.d.               | HPLC-UV              | Several constituents tentatively identified by HPLC-UV and reference standards (gallic acid, chlorogenic acid and caffeic acid)                                                                              | 0.1 – 100 µg/ml <sup>106</sup>       | ROS stress survival     | Induced with 160 µM juglone                                                               | CL2070 | L1     | OP50 | Solid agar | Diluted in OP50                                               | 0.01% DMSO | Improved | daf-16, hsf-1, skn-1 |  |
|                             |               |              |                      |               |                    |                      |                                                                                                                                                                                                              |                                      | ROS levels              | Measurement of dichlorofluorescein fluorescence with plate reader                         |        |        |      |            |                                                               |            | CL2006   |                      |  |
|                             |               |              |                      |               |                    |                      |                                                                                                                                                                                                              |                                      | Proteotoxicity          | Paralysis assay with constitutive amyloid beta expression in muscles                      |        |        |      |            |                                                               |            |          |                      |  |

|                              |                |                |                            |                                                                                                                                             |                                                    |                      |                                                                                                                                                                                                                     |                                                 |                                     |                                                                                              |    |          |                          |            |                                    |           |                      |               |       |
|------------------------------|----------------|----------------|----------------------------|---------------------------------------------------------------------------------------------------------------------------------------------|----------------------------------------------------|----------------------|---------------------------------------------------------------------------------------------------------------------------------------------------------------------------------------------------------------------|-------------------------------------------------|-------------------------------------|----------------------------------------------------------------------------------------------|----|----------|--------------------------|------------|------------------------------------|-----------|----------------------|---------------|-------|
| <i>Phyllanthus emblica</i>   | Phyllanthaceae | Fruits         | Hydroethanolic (45%)       | Crude extract                                                                                                                               | Total phenols, total antioxidants                  | HPLC-MS              | Several compounds tentatively identified using HPLC-MS (Protocatechuic acid, quercetin, myricetin, ellagic, gallic, naringenin, cyanidin 3-arabinoside, genistin, chlorogenic acids and glycosides)                 | 0.1, 0.2, 0.4, 0.8 and 1.2 mg/mL <sup>133</sup> | Lifespan<br>Thermal stress survival | Mean lifespan<br>Induced with 35 °C                                                          | N2 | L4<br>L1 | heat-killed E. coli OP50 | Solid agar | n.d.                               | 0.1% DMSO | Improved<br>Improved |               |       |
| <i>Glochidion zeylanicum</i> |                | Leaves         | Hexane                     | Crude extract                                                                                                                               | Total phenols, total flavonoid, total antioxidants | GC-MS                | Several compounds tentatively identified using GC-MS dereplication (e.g. pentadecanoic acid, n-hexadecanoic acid, phytol, octadecatrienoic acid, octadecanoic acid, hexanedioic acid and benzoic acid)              | 25, 50 and 100 µg/ml <sup>34</sup>              | Lifespan                            | Mean lifespan                                                                                | N2 | L4<br>L1 | OP50                     | Solid agar | in OP50 lawn                       | 1% DMSO   | Improved<br>Improved | skn-1, daf-16 |       |
|                              |                |                |                            |                                                                                                                                             |                                                    |                      |                                                                                                                                                                                                                     |                                                 | Pharyngeal pumping                  | Pumping rate                                                                                 |    |          |                          |            |                                    |           |                      |               |       |
|                              |                |                |                            |                                                                                                                                             |                                                    |                      |                                                                                                                                                                                                                     |                                                 | Autofluorescence                    | (360/ 460) filter; microscopy + image processing                                             |    |          |                          |            |                                    |           |                      |               |       |
|                              |                |                |                            |                                                                                                                                             |                                                    |                      |                                                                                                                                                                                                                     |                                                 | ROS stress survival                 | Induced with 80 µM juglone                                                                   |    |          |                          |            |                                    |           |                      |               |       |
|                              |                |                |                            |                                                                                                                                             |                                                    |                      |                                                                                                                                                                                                                     |                                                 | ROS levels                          | Measurement of intracellular dichlorofluorescein fluorescence; microscopy + Image Processing |    |          |                          |            |                                    |           |                      |               |       |
|                              |                |                |                            |                                                                                                                                             |                                                    |                      |                                                                                                                                                                                                                     |                                                 | Nuclear translocation               | DAF-16::GFP                                                                                  |    |          |                          |            |                                    |           |                      |               | TJ356 |
|                              |                |                |                            |                                                                                                                                             |                                                    |                      |                                                                                                                                                                                                                     |                                                 |                                     | SKN-1::GFP                                                                                   |    |          |                          |            |                                    |           |                      |               | LD1   |
|                              |                |                |                            |                                                                                                                                             |                                                    |                      |                                                                                                                                                                                                                     |                                                 |                                     |                                                                                              |    |          |                          |            |                                    |           |                      |               |       |
|                              |                |                |                            |                                                                                                                                             |                                                    |                      |                                                                                                                                                                                                                     |                                                 |                                     |                                                                                              |    |          |                          |            |                                    |           |                      |               |       |
|                              |                |                |                            |                                                                                                                                             |                                                    |                      |                                                                                                                                                                                                                     |                                                 |                                     |                                                                                              |    |          |                          |            |                                    |           |                      |               |       |
| <i>Ziziphus jujuba</i>       | Rhamnaceae     | Seed           | Hydroethanolic (70%)       | Crude extract of degreased (hexane) seeds                                                                                                   | Total antioxidants, total flavonoids               | HPLC-MS <sup>2</sup> | 10 compounds tentatively identified using HPLC-MS <sup>2</sup> (e.g. swertisin, isovitexin, 6''-(4''-O-glc)-vanilloylspinosin, isovitexin-β-glucopyranoside, 6''-p-hydroxybenzoylspinosin, 6''-p-coumaroylspinosin) | 10, 50, 100 µg/mL <sup>61</sup>                 | Lifespan                            | Mean lifespan                                                                                | N2 | L4<br>L1 | OP50                     | Solid agar | in OP50 lawn                       | 1% DMSO   | Improved<br>Improved | skn-1, daf-16 |       |
|                              |                |                |                            |                                                                                                                                             |                                                    |                      |                                                                                                                                                                                                                     |                                                 | Pharyngeal pumping                  | Pumping rate                                                                                 |    |          |                          |            |                                    |           |                      |               |       |
|                              |                |                |                            |                                                                                                                                             |                                                    |                      |                                                                                                                                                                                                                     |                                                 | Autofluorescence                    | (360/ 460) filter; microscopy + image processing                                             |    |          |                          |            |                                    |           |                      |               |       |
|                              |                |                |                            |                                                                                                                                             |                                                    |                      |                                                                                                                                                                                                                     |                                                 | ROS stress survival                 | Induced with 80 µM juglone                                                                   |    |          |                          |            |                                    |           |                      |               |       |
|                              |                |                |                            |                                                                                                                                             |                                                    |                      |                                                                                                                                                                                                                     |                                                 | ROS levels                          | Measurement of intracellular dichlorofluorescein fluorescence; microscopy + Image Processing |    |          |                          |            |                                    |           |                      |               |       |
|                              |                |                |                            |                                                                                                                                             |                                                    |                      |                                                                                                                                                                                                                     |                                                 | Nuclear translocation               | DAF-16::GFP                                                                                  |    |          |                          |            |                                    |           |                      |               | TJ356 |
|                              |                |                |                            |                                                                                                                                             |                                                    |                      |                                                                                                                                                                                                                     |                                                 |                                     | SKN-1::GFP                                                                                   |    |          |                          |            |                                    |           |                      |               | LD1   |
|                              |                |                |                            |                                                                                                                                             |                                                    |                      |                                                                                                                                                                                                                     |                                                 |                                     |                                                                                              |    |          |                          |            |                                    |           |                      |               |       |
|                              |                |                |                            |                                                                                                                                             |                                                    |                      |                                                                                                                                                                                                                     |                                                 |                                     |                                                                                              |    |          |                          |            |                                    |           |                      |               |       |
|                              |                |                |                            |                                                                                                                                             |                                                    |                      |                                                                                                                                                                                                                     |                                                 |                                     |                                                                                              |    |          |                          |            |                                    |           |                      |               |       |
| <i>Potentilla aurea</i>      | Rosaceae       | Herb           | dichloromethane – methanol | Lead-like enhanced extract: Combined dichloromethane and methanol extracts of degreased (hexane) material, tannin depleted by polyamide SPE | n.d.                                               | n.d.                 | n.d.                                                                                                                                                                                                                | 25 and 100 µg/ml <sup>2</sup>                   | Lifespan                            | Minimum, median, maximum lifespan                                                            | N2 | L4       | OP50                     | S medium   | Diluted in liquid                  | 1% DMSO   | No effect            | n.d.          |       |
|                              |                |                |                            |                                                                                                                                             |                                                    |                      |                                                                                                                                                                                                                     |                                                 | Thermal stress survival             | Induced with 35 °C                                                                           |    |          |                          |            |                                    |           |                      |               |       |
|                              |                |                |                            |                                                                                                                                             |                                                    |                      |                                                                                                                                                                                                                     |                                                 | Proteotoxicity                      | Paralysis assay with temperature-dependent amyloid beta expression in muscles                |    |          |                          |            |                                    |           |                      |               |       |
| <i>Armeniaca mume</i>        |                | Flower (buds)  | Hydroethanolic (80%)       | Crude extract                                                                                                                               | Total antioxidants                                 | n.d.                 | n.d.                                                                                                                                                                                                                | 50 mg/mL <sup>24</sup>                          | Lifespan                            | Mean and Median Lifespan                                                                     | N2 | L4       | UV inactivated OP50      | Solid agar | Added onto the surfaces of the NGM | n.d.      | No effect            | n.d.          |       |
|                              |                |                |                            |                                                                                                                                             |                                                    |                      |                                                                                                                                                                                                                     |                                                 |                                     |                                                                                              |    |          |                          |            |                                    |           |                      |               |       |
| <i>Prunus × yedoensis</i>    |                | Flower (petal) | Hydroethanolic (80%)       | Crude extract                                                                                                                               | Total antioxidants                                 | n.d.                 | n.d.                                                                                                                                                                                                                | 50 mg/mL <sup>24</sup>                          | Lifespan                            | Mean and Median Lifespan                                                                     | N2 | L4       | UV inactivated OP50      | Solid agar | Added onto the                     | n.d.      | No effect            | n.d.          |       |

|                              |                 |                                                                              |                                                   |                                                         |                      |                                                                                                                                                                                                                                                                                                                                                   |                                     |                                                                               |                          |    |           |                       |            |                                    |                            |           |                                        |
|------------------------------|-----------------|------------------------------------------------------------------------------|---------------------------------------------------|---------------------------------------------------------|----------------------|---------------------------------------------------------------------------------------------------------------------------------------------------------------------------------------------------------------------------------------------------------------------------------------------------------------------------------------------------|-------------------------------------|-------------------------------------------------------------------------------|--------------------------|----|-----------|-----------------------|------------|------------------------------------|----------------------------|-----------|----------------------------------------|
|                              |                 |                                                                              |                                                   |                                                         |                      |                                                                                                                                                                                                                                                                                                                                                   |                                     |                                                                               |                          |    |           |                       |            | surfaces of the NGM                |                            |           |                                        |
| <i>Prunus persica</i>        | Flower (petal)  | Hydroethanolic (80%)                                                         | Crude extract                                     | Total antioxidants                                      | n.d.                 | n.d.                                                                                                                                                                                                                                                                                                                                              | 50 mg/mL <sup>24</sup>              | Lifespan                                                                      | Mean and Median Lifespan | N2 | L4        | UV inactivated OP50   | Solid agar | Added onto the surfaces of the NGM | n.d.                       | No effect | n.d.                                   |
| <i>Prunus avium</i>          | Fruit           | MeOH-0.5 N HCl (95:5)                                                        | Anthocyanin enriched fraction obtained by C18 SPE | Total phenols, total anthocyanidins                     | HPLC-MS <sup>2</sup> | Several compounds tentatively identified with HPLC-MS <sup>2</sup> (neochlorogenic acid, 3-coumaroylquinic acid, feruloylquinic acid, 4-coumaroylquinic acid, cyanidin-3-O-glucoside, cyanidin-3-O-rutinoside, pelargonidin-3-O-rutinoside, peonidin-3-O-rutinoside, dicaffeoylquinic acid, quercetin-3-O-glucoside, quercetin-3-O-rutinoside)    | 25 µg/mL <sup>134</sup>             | Thermal stress survival                                                       | Induced with 37°C        | N2 | L1        | OP50                  | Solid agar | Added to NGM during preparation    | n.d. concentration of DMSO | Improved  | n.d.                                   |
|                              | Fruit pomace    | Combined hydroethanolic (50%, acidified pH=2) and hydroacetone extract (70%) | Crude extract                                     | Total phenols, total anthocyanidins, total antioxidants | HPTLC, DART-MS       | Several compounds tentatively identified using DART-MS (e.g. dihydroxybenzoic acid, coumaric acid, gallic acid, dihydroxycoumarin acid, caffeic acid, syringaldehyde, ferulic acid, sinapaldehyde, hydroxyferulic acid, pinocembrin, kaempferol, catechin, procyanidin B2, quercetin, taxifolin, (epi)gallocatechin, myricetin, methoxytaxifolin) | 100 and 400 µg/mL <sup>107</sup>    | Locomotion                                                                    | n.d.                     | N2 | L1        | OP50                  | Solid agar | Supplemented to NGM plates         | 5% DMSO                    | Improved  |                                        |
| ROS stress survival          |                 |                                                                              |                                                   |                                                         |                      |                                                                                                                                                                                                                                                                                                                                                   |                                     | Induced with 2mM H <sub>2</sub> O <sub>2</sub>                                | No effect                |    |           |                       |            |                                    |                            |           |                                        |
| Proteotoxicity               |                 |                                                                              |                                                   |                                                         |                      |                                                                                                                                                                                                                                                                                                                                                   |                                     | Paralysis assay with temperature-dependent amyloid beta expression in muscles | CL4176                   | L1 | No effect |                       |            |                                    |                            |           |                                        |
| <i>Crataegus pinnatifida</i> | Fruits          | Hydroethanolic (80%)                                                         | Crude extract                                     | Total phenols, total flavonoids                         | HPLC-UV              | Procyanidin B2 and epicatechin were tentatively identified using HPLC-UV                                                                                                                                                                                                                                                                          | 25, 50 and 100 µg mL <sup>135</sup> | Lifespan                                                                      | Mean lifespan            | N2 | L4        | Heat inactivated OP50 | Solid agar | Covered onto plate                 | n.d.                       | Improved  | daf-2, age-1, daf-16, skn-1, and hsf-1 |
|                              |                 |                                                                              |                                                   |                                                         |                      |                                                                                                                                                                                                                                                                                                                                                   |                                     |                                                                               |                          |    |           |                       |            |                                    |                            | Improved  |                                        |
|                              |                 |                                                                              |                                                   |                                                         |                      |                                                                                                                                                                                                                                                                                                                                                   |                                     |                                                                               |                          |    |           |                       |            |                                    |                            | No effect |                                        |
|                              |                 |                                                                              |                                                   |                                                         |                      |                                                                                                                                                                                                                                                                                                                                                   |                                     |                                                                               |                          |    |           |                       |            |                                    |                            | Improved  |                                        |
|                              |                 |                                                                              |                                                   |                                                         |                      |                                                                                                                                                                                                                                                                                                                                                   |                                     |                                                                               |                          |    |           |                       |            |                                    |                            | Improved  |                                        |
|                              |                 |                                                                              |                                                   |                                                         |                      |                                                                                                                                                                                                                                                                                                                                                   |                                     |                                                                               |                          |    |           |                       |            |                                    |                            | Improved  |                                        |
|                              |                 |                                                                              |                                                   |                                                         |                      |                                                                                                                                                                                                                                                                                                                                                   |                                     |                                                                               |                          |    |           |                       |            |                                    |                            | Improved  |                                        |
|                              |                 |                                                                              |                                                   |                                                         |                      |                                                                                                                                                                                                                                                                                                                                                   |                                     |                                                                               |                          |    |           |                       |            |                                    |                            | Improved  |                                        |
|                              |                 |                                                                              |                                                   |                                                         |                      |                                                                                                                                                                                                                                                                                                                                                   |                                     |                                                                               |                          |    |           |                       |            |                                    |                            | Improved  |                                        |
|                              |                 |                                                                              |                                                   |                                                         |                      |                                                                                                                                                                                                                                                                                                                                                   |                                     |                                                                               |                          |    |           |                       |            |                                    |                            | Improved  |                                        |
| <i>Rosa chinensis</i>        | Flower (petals) | Hydroethanolic (80%)                                                         | Crude extract                                     | Total antioxidants                                      | n.d.                 | n.d.                                                                                                                                                                                                                                                                                                                                              | 50 mg/mL <sup>24</sup>              | Lifespan                                                                      | Mean and Median Lifespan | N2 | L4        | UV inactivated OP50   | Solid agar | Added onto the                     | n.d.                       | No effect | n.d.                                   |

|                            |                 |                                               |                                                                                                                                             |                                                                     |                      |                                                                                                                                                                                                                                                                                                                                      |                                          |                                             |                                                                                                                            |    |          |                     |            |                                    |                     |                                  |                                              |  |
|----------------------------|-----------------|-----------------------------------------------|---------------------------------------------------------------------------------------------------------------------------------------------|---------------------------------------------------------------------|----------------------|--------------------------------------------------------------------------------------------------------------------------------------------------------------------------------------------------------------------------------------------------------------------------------------------------------------------------------------|------------------------------------------|---------------------------------------------|----------------------------------------------------------------------------------------------------------------------------|----|----------|---------------------|------------|------------------------------------|---------------------|----------------------------------|----------------------------------------------|--|
|                            |                 |                                               |                                                                                                                                             |                                                                     |                      |                                                                                                                                                                                                                                                                                                                                      |                                          |                                             |                                                                                                                            |    |          |                     |            |                                    | surfaces of the NGM |                                  |                                              |  |
| <i>Rosa rugosa</i>         | Flowers         | Hydroethanol (80%)                            | Crude extract                                                                                                                               | Total antioxidants                                                  | n.d.                 | n.d.                                                                                                                                                                                                                                                                                                                                 | 50 mg/mL <sup>24</sup>                   | Lifespan                                    | Mean and Median Lifespan                                                                                                   | N2 | L4       | UV inactivated OP50 | Solid agar | Added onto the surfaces of the NGM | n.d.                | No effect                        | n.d.                                         |  |
|                            |                 | Aqueous                                       | Crude extract (digestion) of steam-distilled flowers                                                                                        | Total phenols                                                       | HPLC-MS <sup>2</sup> | 23 compounds tentatively identified using HPLC-MS <sup>2</sup> (e.g. glycosides of gallates, hexahydroxydiphenic acid, quercetin, kaempferol, eriodictyol)                                                                                                                                                                           | 25, 50, 100, and 200 µg/ml <sup>52</sup> | Lifespan<br>thermal stress survival         | mean lifespan<br>Induced with 35°C                                                                                         | N2 | L4       | OP50                | Solid agar | n.d.                               | 0% DMSO             | Improved<br>Improved             | n.d.                                         |  |
| <i>Rosa roxburghii</i>     | Fruit pomace    | Hydroethanol (70%)                            | Crude extract                                                                                                                               | Total phenols, total flavonoids, total antioxidants                 | HPLC-MS <sup>2</sup> | Several compound tentatively identified and major phenols were quantified with HPLC-MS <sup>2</sup> (gallic acid, gallic acid, gallo catechin, epigallocatechin, catechin, hydroxybenzoic acid, epicatechin, ellagic acid, ferulic acid and quercetin)                                                                               | 20, 50 and 100 µg/ mL <sup>136</sup>     | ROS stress survival<br>Antioxidant capacity | Induced with 50 mM paraquat<br>Measurement of intracellular dichlorofluorescein fluorescence after treatment with paraquat | N2 | L4       | NA22                | S medium   | Diluted in liquid                  | n.d.                | Improved<br>Improved             | n.d.                                         |  |
|                            |                 | Aqueous (4M NaOH)                             | Ethylacetat Fraction obtained from aqueous crude extract by liquid-partition                                                                | Total phenols, total flavonoids, total antioxidants                 | HPLC-MS <sup>2</sup> | Several compound tentatively identified and major phenols were quantified with HPLC-MS <sup>2</sup> (gallic acid, gallo catechin, epigallocatechin, catechin, hydroxybenzoic acid, epicatechin, ellagic acid, ferulic acid and quercetin)                                                                                            | 20, 50 and 100 µg/ mL <sup>136</sup>     | ROS stress survival<br>Antioxidant capacity | Induced with 50 mM paraquat<br>Measurement of intracellular dichlorofluorescein fluorescence after treatment with paraquat | N2 | L4       | NA22                | S medium   | Diluted in liquid                  | n.d.                | Improved<br>Improved             | n.d.                                         |  |
| <i>Rosa x hybridus</i>     | Flower (petals) | Methanol:Water:Formic acid (80:20:0.1, v/v/v) | Crude extract                                                                                                                               | Total phenols, total antioxidants, total flavonoids                 | HPLC-MS <sup>2</sup> | Several compounds tentatively identified using HPLC-MS <sup>2</sup> (Cyanidin 3,5-O-diglycoside, cyanidin 3-O-rutinoside, (+)-catechin, (-)-epicatechin, procyanidin dimers and trimers, glycosides of kaempferol myricetin, quercetin, 5-O-galloylquinic acid, ellagic acid, Ellagic acid glycosides, gallic acid, p-coumaric acid) | 100 µg/mL <sup>137</sup>                 | Lifespan<br>Proteotoxicity                  | n.d.<br>Paralysis assay with temperature-dependent amyloid beta expression in muscles                                      | N2 | L1<br>L3 | OP50                | Solid agar | added to the OP50                  | 0% DMSO             | No effect<br>Improved            | n.d.                                         |  |
| <i>Eriobotrya japonica</i> | Flowers         | Hydroethanol (80%)                            | Crude extract                                                                                                                               | Total phenols, total flavonoids, total terpenes, total antioxidants | n.d.                 | n.d.                                                                                                                                                                                                                                                                                                                                 | 50 mg/mL <sup>24</sup>                   | Lifespan                                    | Mean and Median Lifespan                                                                                                   | N2 | L4       | UV inactivated OP50 | Solid agar | Added onto the surfaces of the NGM | n.d.                | Improved                         | n.d.                                         |  |
|                            | Leaves          | dichloromethane – methanol                    | Lead-like enhanced extract: Combined dichloromethane and methanol extracts of degreased (hexane) material, tannin depleted by polyamide SPE | n.d.                                                                | n.d.                 | n.d.                                                                                                                                                                                                                                                                                                                                 | 25 and 100 µg/ml <sup>2</sup>            | Lifespan                                    | Death Time 50 (DT50)                                                                                                       | N2 | L4       | OP50                | S medium   | Diluted in liquid                  | 1% DMSO             | Improved                         | n.d.                                         |  |
| <i>Rubus idaeus</i>        | Fruits          | Aqueous acetone (80%)                         | Crude extract                                                                                                                               | Total phenols, total flavonoids                                     | HPLC-UV              | Several constituents were tentatively identified by HPLC-UV (ellagic acid, salicylic acid, chlorogenic acid, p-coumaric,                                                                                                                                                                                                             | 20, 40 and 80 mg/mL <sup>138</sup>       | Lifespan<br>Locomotion<br>Autofluorescence  | relative lifespan<br>Motility classes<br>microscopy + Image processing (n.d. filter)                                       | N2 | A<br>L4  | OP50                | Solid agar | n.d.                               | n.d.                | Improved<br>Improved<br>Improved | <i>daf-16, daf-2, age-1, akt-2, sir-2.1,</i> |  |

|                              |              |         |                                 |                                                                                                                                    |                                                     |              |                                                                                                                                                                                                                                         |                                     |                                                   |                                                                                         |              |          |                       |                |                             |                            |                       |                                         |          |
|------------------------------|--------------|---------|---------------------------------|------------------------------------------------------------------------------------------------------------------------------------|-----------------------------------------------------|--------------|-----------------------------------------------------------------------------------------------------------------------------------------------------------------------------------------------------------------------------------------|-------------------------------------|---------------------------------------------------|-----------------------------------------------------------------------------------------|--------------|----------|-----------------------|----------------|-----------------------------|----------------------------|-----------------------|-----------------------------------------|----------|
|                              |              |         |                                 |                                                                                                                                    |                                                     |              | quercitrin, (+) catechin and luteolin)                                                                                                                                                                                                  |                                     | Thermal stress survival                           | Induced with 35 °C                                                                      |              | n.d.     |                       |                |                             |                            | Improved              | <i>skn-1, jnk-1</i>                     |          |
|                              |              |         |                                 |                                                                                                                                    |                                                     |              |                                                                                                                                                                                                                                         |                                     | UV stress survival                                | Induced with UV-B 1200 J/m <sup>2</sup>                                                 |              | n.d.     |                       |                |                             |                            | Improved              |                                         |          |
|                              |              |         |                                 |                                                                                                                                    |                                                     |              |                                                                                                                                                                                                                                         |                                     | Nuclear translocation                             | DAF-16::GFP                                                                             | TJ356        | n.d.     |                       |                |                             |                            | Improved              |                                         |          |
| <i>Celastrus paniculatus</i> | Celastraceae | Seeds   | Dichloromethane                 | Fraction enriched with dihydro-β-agarofurans obtained after extraction of suspended crude extract in petroleum ether with 75% EtOH | n.d.                                                | HPLC-MS, NMR | Bioactivity guided fractionation led to the isolation of 30 dihydro-β-agarofurans including celaspaculin H, celaspaculin E, celaspaculin L and celaspaculin N                                                                           | 27.5 μg/m <sup>90l</sup>            | Lifespan                                          | Mean and maximum lifespan                                                               | N2           | L4       | OP50                  | Solid agar     | n.d. concentration of DMSO  | n.d.                       | Improved              | <i>daf-16</i>                           |          |
| <i>Bixa orellana</i>         | Bixaceae     | Seeds   | Ethanol:isopropyl acetate:water | Organic fraction of the extraction supernatant                                                                                     | n.d.                                                | HPLC-UV      | Bixin (30%) and δ-tocotrienol (10%) were quantified using HPLC-UV and reference compounds                                                                                                                                               | 60, 100, or 170 μg/mL <sup>98</sup> | Lifespan                                          | Medium and maximum lifespan                                                             | N2           | L4       | UV-inactivated OP50   | Solid agar     | added to the solidified NGM | 3% EtOH                    | Improved              | <i>hsf-1, daf-16</i>                    |          |
|                              |              |         |                                 |                                                                                                                                    |                                                     |              |                                                                                                                                                                                                                                         |                                     | Thermal stress survival                           | Induced with 35°C                                                                       |              |          |                       |                |                             |                            |                       |                                         |          |
|                              |              |         |                                 |                                                                                                                                    |                                                     |              |                                                                                                                                                                                                                                         |                                     | ROS stress survival                               | Induced with 1.4 mM H <sub>2</sub> O <sub>2</sub>                                       |              |          |                       |                |                             |                            |                       |                                         |          |
| <i>Humulus lupulus</i>       | Cannabaceae  | Flowers | Aqueous                         | Crude extract                                                                                                                      | Total phenols, total antioxidants                   | HPLC-MS, NMR | 42 compounds tentatively identified using HPLC-MS and NMR (glycosyl flavonoids (quercetin, kaempferol, luteolin), procyanidins, catechin, 3-O-caffeoylquinic acid, 4-O-p-coumaroyl quinic acid, syringin)                               | 10–250 μg/mL                        | Proteotoxicity                                    | Paralysis assay with constitutive amyloid beta expression in muscles                    | CL2006       | L3       | OP50                  | Solid agar     | Fed to the worms            | 0% DMSO                    | Improved              | n.d.                                    |          |
| <i>Morus alba</i>            | Moraceae     | Fruits  | Ethanol                         | Anthocyan-enriched fraction obtained after ion exchange chromatography                                                             | Total protein, total carbohydrate                   | HPLC-UV      | Cyanidin-3-glucoside, cyanidin-3-rutinoside quantified with HPLC-UV and standards                                                                                                                                                       | 100 μg/mL <sup>139</sup>            | Lifespan                                          | Mean lifespan under high glucose (50 mM) conditions                                     | N2           | Adult    | OP50                  | Solid NGM agar | Dilute in OP50              | n.d.                       | Improved              | <i>daf-2</i>                            |          |
|                              |              |         |                                 |                                                                                                                                    |                                                     |              |                                                                                                                                                                                                                                         |                                     | Autofluorescence                                  | under high glucose (50 mM) conditions; DAPI filter set<br>Microscopy + image processing |              |          |                       |                |                             |                            |                       |                                         | n.d.     |
|                              |              | Leaves  | Hydroethanolic (pH=4)           | Crude extract                                                                                                                      | Total phenols                                       | HPLC-UV      | Several phenols tentatively identified with HPLC-UV and standards (e.g. epicatechin, hyperoside, vanillic acid, syringic acid)                                                                                                          | 25 μg/mL <sup>140</sup>             | Lifespan                                          | Mean lifespan                                                                           | N2           | L1       | Heat inactivated OP50 | Solid NGM agar | n.d.                        | n.d.                       | Improved              | <i>daf-12, daf-16, pha-4 and nhr-80</i> |          |
|                              |              |         |                                 |                                                                                                                                    |                                                     |              |                                                                                                                                                                                                                                         | ROS stress survival                 | Induced with 0.5 mM H <sub>2</sub> O <sub>2</sub> |                                                                                         |              |          |                       |                |                             |                            |                       |                                         | Improved |
|                              |              |         |                                 |                                                                                                                                    |                                                     |              |                                                                                                                                                                                                                                         |                                     | Induced with 1 mM H <sub>2</sub> O <sub>2</sub>   |                                                                                         |              |          |                       |                |                             |                            |                       |                                         | Improved |
|                              |              |         |                                 |                                                                                                                                    |                                                     |              |                                                                                                                                                                                                                                         |                                     | Induced with 1.5 mM H <sub>2</sub> O <sub>2</sub> |                                                                                         |              |          |                       |                |                             |                            |                       |                                         | Improved |
| <i>Morus nigra</i>           |              | Fruits  | Aqueous                         | Crude extract                                                                                                                      | n.d.                                                | HPLC-UV      | Several compounds were tentatively identified and quantified with HPLC-UV and standards (protocatechuic acid, gallic acid, ferulic acid, chlorogenic acid, rutin, isoquercitrin, astragalgin, quercetin, morin, cyanidin-3-O-glucoside) | 0.01, 0.1 and 1 mg/mL <sup>29</sup> | Lifespan                                          | Median and maximum lifespan                                                             | N2<br>CL4176 | L4       | OP50                  | Solid NGM agar | Added to the NGM            | 0% DMSO                    | Improved              | <i>daf-16, sod-3, gst-4</i>             |          |
|                              |              |         |                                 |                                                                                                                                    |                                                     |              |                                                                                                                                                                                                                                         |                                     | ROS levels                                        | Measurement of intracellular dichlorofluorescein fluorescence                           | N2<br>CL4176 | L1       |                       |                |                             |                            |                       |                                         | Improved |
|                              |              |         |                                 |                                                                                                                                    |                                                     |              |                                                                                                                                                                                                                                         |                                     | Proteotoxicity                                    | Paralysis assay with temperature-dependent amyloid beta expression in muscles           | CL4176       |          |                       |                |                             |                            |                       |                                         | Improved |
|                              |              |         |                                 |                                                                                                                                    |                                                     |              |                                                                                                                                                                                                                                         |                                     | Nuclear translocation                             | DAF-16::GFP                                                                             | TJ356        |          |                       |                |                             |                            |                       |                                         | Improved |
| <i>Streblus asper</i>        |              | Leaves  | Ethanol                         | Crude extract                                                                                                                      | Total phenols, total flavonoids, total antioxidants | HPLC-MS      | Several phenols tentatively identified with HPLC-MS (e.g. andrographolide, carnolic acid, (+)-3-O-β-D-fucopyranosylperiplogenin, streblusignanol, magnolignan A, α-linolenic                                                            | 25 and 50 μg/mL                     | Lifespan                                          | Mean and maximum lifespan                                                               | N2           | L1<br>L4 | OP50                  | Solid NGM agar | Supplemented to OP50        | n.d. concentration of DMSO | Improved<br>No effect | n.d.                                    |          |

|                                                                  |              |             |                                 |                                                                                                                                             |                                                                     |         |                                                                     |                                           |                     |                                                                                                                                                                     |       |       |                     |            |                                    |           |                                                |        |          |                   |          |      |      |                             |          |                          |    |    |      |            |                   |          |          |               |                         |                                                                   |          |           |
|------------------------------------------------------------------|--------------|-------------|---------------------------------|---------------------------------------------------------------------------------------------------------------------------------------------|---------------------------------------------------------------------|---------|---------------------------------------------------------------------|-------------------------------------------|---------------------|---------------------------------------------------------------------------------------------------------------------------------------------------------------------|-------|-------|---------------------|------------|------------------------------------|-----------|------------------------------------------------|--------|----------|-------------------|----------|------|------|-----------------------------|----------|--------------------------|----|----|------|------------|-------------------|----------|----------|---------------|-------------------------|-------------------------------------------------------------------|----------|-----------|
|                                                                  |              |             |                                 |                                                                                                                                             |                                                                     |         | acid, oleoyl-oxazolopyridine and taxifolin)                         |                                           |                     |                                                                                                                                                                     |       |       |                     |            |                                    |           |                                                |        |          |                   |          |      |      |                             |          |                          |    |    |      |            |                   |          |          |               |                         |                                                                   |          |           |
| <i>Sida cordifolia</i>                                           | Malvaceae    | Herb        | dichloromethane – methanol      | Lead-like enhanced extract: Combined dichloromethane and methanol extracts of degreased (hexane) material, tannin depleted by polyamide SPE | n.d.                                                                | n.d.    | n.d.                                                                | 25 and 100 µg/ml <sup>2</sup>             | Lifespan            | Death Time 50 (DT50)                                                                                                                                                | N2    | L4    | OP50                | S medium   | Diluted in liquid                  | 1% DMSO   | No effect                                      | n.d.   |          |                   |          |      |      |                             |          |                          |    |    |      |            |                   |          |          |               |                         |                                                                   |          |           |
| <i>Hibiscus sabdariffae</i>                                      |              | Flowers     | Hydroethanolic (80%)            | Crude extract                                                                                                                               | Total phenols, total flavonoids, total terpenes, total antioxidants | n.d.    | n.d.                                                                | 50 mg/mL <sup>24</sup>                    | Lifespan            | Mean and Median Lifespan                                                                                                                                            | N2    | L4    | UV inactivated OP50 | Solid agar | Added onto the surfaces of the NGM | n.d.      | Improved                                       | n.d.   |          |                   |          |      |      |                             |          |                          |    |    |      |            |                   |          |          |               |                         |                                                                   |          |           |
|                                                                  |              |             |                                 |                                                                                                                                             |                                                                     |         |                                                                     |                                           |                     |                                                                                                                                                                     |       |       |                     |            |                                    |           |                                                |        | Aqueous  | Crude extract     | n.d.     | n.d. | n.d. | 0.25 – 1 mg/ml <sup>3</sup> | Lifespan | Mean and median lifespan | N2 | L4 | OP50 | Liquid NGM | Diluted in liquid | 0 % DMSO | Improved | daf-16, skn-1 |                         |                                                                   |          |           |
|                                                                  |              |             |                                 |                                                                                                                                             |                                                                     |         |                                                                     |                                           |                     |                                                                                                                                                                     |       |       |                     |            |                                    |           |                                                |        |          |                   |          |      |      |                             |          |                          |    |    |      |            |                   |          |          |               | Locomotion              | Motility classes                                                  | Improved |           |
|                                                                  |              |             |                                 |                                                                                                                                             |                                                                     |         |                                                                     |                                           |                     |                                                                                                                                                                     |       |       |                     |            |                                    |           |                                                |        |          |                   |          |      |      |                             |          |                          |    |    |      |            |                   |          |          |               | Thermal stress survival | Induced with 35°C                                                 |          | No effect |
|                                                                  |              |             |                                 |                                                                                                                                             |                                                                     |         |                                                                     |                                           |                     |                                                                                                                                                                     |       |       |                     |            |                                    |           |                                                |        |          |                   |          |      |      |                             |          |                          |    |    |      |            |                   |          |          |               | ROS levels              | Measurement of dichlorofluorescein fluorescence with plate reader |          | No effect |
|                                                                  |              |             |                                 |                                                                                                                                             |                                                                     |         |                                                                     |                                           |                     |                                                                                                                                                                     |       |       |                     |            |                                    |           |                                                |        |          |                   |          |      |      |                             |          |                          |    |    |      |            |                   |          |          |               | Nuclear translocation   | DAF-16::GFP                                                       |          | TJ356     |
|                                                                  |              |             |                                 |                                                                                                                                             |                                                                     |         |                                                                     |                                           |                     |                                                                                                                                                                     |       |       |                     |            |                                    |           |                                                |        |          |                   |          |      |      |                             |          |                          |    |    |      |            |                   |          |          |               |                         |                                                                   |          |           |
|                                                                  |              |             |                                 |                                                                                                                                             |                                                                     |         |                                                                     |                                           |                     |                                                                                                                                                                     |       |       |                     |            |                                    |           |                                                |        |          |                   |          |      |      |                             |          |                          |    |    |      |            |                   |          |          |               |                         |                                                                   |          |           |
|                                                                  |              |             |                                 |                                                                                                                                             |                                                                     |         |                                                                     |                                           |                     |                                                                                                                                                                     |       |       |                     |            |                                    |           |                                                |        |          |                   |          |      |      |                             |          |                          |    |    |      |            |                   |          |          |               |                         |                                                                   |          |           |
|                                                                  |              |             |                                 |                                                                                                                                             |                                                                     |         |                                                                     |                                           |                     |                                                                                                                                                                     |       |       |                     |            |                                    |           |                                                |        |          |                   |          |      |      |                             |          |                          |    |    |      |            |                   |          |          |               |                         |                                                                   |          |           |
| <i>Luehea divaricata</i>                                         |              | Leaves      | Hydroethanolic (70%)            | Crude extract                                                                                                                               | Total phenols                                                       | HPLC-UV | Rutin was tentatively identified by HPLC-DAD comparison to standard | 100, 200, 400 and 800 µg/ml <sup>63</sup> | ROS stress survival | Induced with 100 mM H <sub>2</sub> O <sub>2</sub><br>Induced with 100 µM juglone<br>Induced with 100 µM Fe <sup>2+</sup><br>Induced with 50 mM sodium nitroprusside | N2    | A     | No food             | S medium   | Diluted in liquid                  | 0.7% EtOH | No effect<br>Improved<br>Improved<br>No effect | n.d.   |          |                   |          |      |      |                             |          |                          |    |    |      |            |                   |          |          |               |                         |                                                                   |          |           |
| <i>Endopleura uchi</i>                                           | Humiriaceae  | Bark        | Aqueous                         | Crude extract                                                                                                                               | Total phenols                                                       | n.d.    | n.d.                                                                | 50, 100, 200 and 300 µg/mL <sup>141</sup> | Lifespan elongation | n.d.                                                                                                                                                                | BA17  | AduIt | OP50                | Solid agar | n.d.                               | 0% DMSO   | Improved                                       | DAF-16 |          |                   |          |      |      |                             |          |                          |    |    |      |            |                   |          |          |               |                         |                                                                   |          |           |
|                                                                  |              |             |                                 |                                                                                                                                             |                                                                     |         |                                                                     |                                           | Pharyngeal pumping  | Pumping rate                                                                                                                                                        | N2    |       |                     |            |                                    |           |                                                |        |          |                   |          |      |      |                             |          |                          |    |    |      |            |                   |          |          |               |                         |                                                                   |          |           |
|                                                                  |              |             |                                 |                                                                                                                                             |                                                                     |         |                                                                     |                                           | ROS stress survival | Induced with 80 µM juglone                                                                                                                                          | L1    |       |                     |            |                                    |           |                                                |        | S medium | Diluted in liquid | Improved |      |      |                             |          |                          |    |    |      |            |                   |          |          |               |                         |                                                                   |          |           |
|                                                                  |              |             |                                 |                                                                                                                                             |                                                                     |         |                                                                     |                                           | ROS levels          | Measurement of intracellular dichlorofluorescein fluorescence                                                                                                       |       |       |                     |            |                                    |           |                                                |        |          |                   |          |      |      |                             |          |                          |    |    |      |            |                   |          |          |               |                         |                                                                   |          |           |
|                                                                  |              |             |                                 |                                                                                                                                             |                                                                     |         |                                                                     |                                           | Proteotoxicity      | YFP tagged polyglutamine in muscles<br>Microscopy + Image Processing                                                                                                | AM141 |       |                     |            |                                    |           |                                                |        | Improved |                   |          |      |      |                             |          |                          |    |    |      |            |                   |          |          |               |                         |                                                                   |          |           |
| <i>Brassica rapa L. ssp. chinensis (L.) Hanelt var. purpurea</i> | Brassicaceae | Fresh stems | methanol/HC I (99.9 : 0.1, v/v) | Crude extract                                                                                                                               | Total phenolics<br>Total anthocyanins                               | n.d.    | n.d.                                                                | 2 mg/ml <sup>142</sup>                    | Lifespan elongation | Mean lifespan                                                                                                                                                       | N2    | L1    | OP50                | S medium   | Diluted in liquid                  | 0% DMSO   | Improved<br>Improved<br>Improved               | n.d.   |          |                   |          |      |      |                             |          |                          |    |    |      |            |                   |          |          |               |                         |                                                                   |          |           |
| <i>Brassica rapa L. ssp.</i>                                     |              | Fresh stems | methanol/HC                     | Crude extract                                                                                                                               | Total phenolics<br>Total                                            | n.d.    | n.d.                                                                | 2 mg/ml <sup>142</sup>                    | Lifespan elongation | Mean lifespan                                                                                                                                                       | N2    | L1    | OP50                | S medium   | Diluted in liquid                  | 0% DMSO   | No effect                                      | n.d.   |          |                   |          |      |      |                             |          |                          |    |    |      |            |                   |          |          |               |                         |                                                                   |          |           |

|                                                                                     |               |              |                                 |                                                                                                                                             |                                                                     |         |                                                                                                                                                                                                                                                                                                                                                                   |                                     |                     |                                                                         |                                                  |    |                       |                               |                                    |           |                                          |                      |
|-------------------------------------------------------------------------------------|---------------|--------------|---------------------------------|---------------------------------------------------------------------------------------------------------------------------------------------|---------------------------------------------------------------------|---------|-------------------------------------------------------------------------------------------------------------------------------------------------------------------------------------------------------------------------------------------------------------------------------------------------------------------------------------------------------------------|-------------------------------------|---------------------|-------------------------------------------------------------------------|--------------------------------------------------|----|-----------------------|-------------------------------|------------------------------------|-----------|------------------------------------------|----------------------|
| <i>chinensis</i><br>(L.) Hanelt<br>var.<br><i>chinensis</i>                         |               |              | I (99.9 : 0.1, v/v)             |                                                                                                                                             | anthocyanins                                                        |         |                                                                                                                                                                                                                                                                                                                                                                   |                                     | ROS stress survival | Induced with 100 mM paraquat                                            |                                                  |    |                       |                               | liquid                             |           | Improved                                 |                      |
|                                                                                     |               |              |                                 |                                                                                                                                             |                                                                     |         |                                                                                                                                                                                                                                                                                                                                                                   |                                     | ROS levels          | Measurement of dichlorofluorescein fluorescence with plate reader       |                                                  |    |                       |                               |                                    |           | Improved                                 |                      |
| <i>Brassica rapa</i> L. ssp. <i>chinensis</i> (L.) Hanelt var. <i>parachinensis</i> |               | Fresh stems  | methanol/HC I (99.9 : 0.1, v/v) | Crude extract                                                                                                                               | Total phenolics<br>Total anthocyanins                               | n.d.    | n.d.                                                                                                                                                                                                                                                                                                                                                              | 2 mg/ml <sup>142</sup>              | Lifespan elongation | Mean lifespan                                                           | N2                                               | L1 | OP50                  | S medium                      | Diluted in liquid                  | 0% DMSO   | No effect                                | n.d.                 |
|                                                                                     |               |              |                                 |                                                                                                                                             |                                                                     |         |                                                                                                                                                                                                                                                                                                                                                                   |                                     | ROS stress survival | Induced with 100 mM paraquat                                            |                                                  |    |                       |                               |                                    |           | Improved                                 |                      |
|                                                                                     |               |              |                                 |                                                                                                                                             |                                                                     |         |                                                                                                                                                                                                                                                                                                                                                                   |                                     | ROS levels          | Measurement of dichlorofluorescein fluorescence with plate reader       |                                                  |    |                       |                               |                                    |           | Improved                                 |                      |
| <i>Citrus aurantium</i>                                                             | Rutaceae      | Flowers      | Hydroethanolic (80%)            | Crude extract                                                                                                                               | Total phenols, total flavonoids, total terpenes, total antioxidants | n.d.    | n.d.                                                                                                                                                                                                                                                                                                                                                              | 50 mg/mL <sup>24</sup>              | Lifespan            | Mean and Median Lifespan                                                | N2                                               | L4 | UV inactivated OP50   | Solid agar                    | Added onto the surfaces of the NGM | n.d.      | Improved                                 | n.d.                 |
| <i>Aquilaria crassna</i>                                                            | Thymelaeaceae | Leaves       | Hexane                          | Crude extract                                                                                                                               | Total phenols, total flavonoids, total antioxidants                 | GC-MS   | Several constituents were tentatively identified with GC-MS and quantified (e.g. 24-methylenecycloartan-3-one, squalene, (3 $\alpha$ )-friedooleanan-3-ol, tritriacontane, vitamin E, $\beta$ -amyrin, 9,19-cyclolanostan-3-ol-24,24-epoxymethanoacetate, lupenonene, hentriacontane, olean-12en-3-one); two compounds (stigmastrol and sitosterol) were isolated | 10 and 50 $\mu$ g/mL <sup>143</sup> | Lifespan            | Mean lifespan                                                           | N2                                               | L1 | Heat-inactivated OP50 | Solid agar with 50 mM glucose | n.d.                               | 0.1% DMSO | Improved                                 | daf-16, sod-3, aqp-1 |
|                                                                                     |               |              |                                 |                                                                                                                                             |                                                                     |         |                                                                                                                                                                                                                                                                                                                                                                   |                                     | ROS levels          | Measurement of intracellular dichlorofluorescein fluorescence           |                                                  |    |                       |                               |                                    |           | Improved                                 |                      |
| <i>Azadirachta indica</i>                                                           | Meliaceae     | Fruits       | dichloromethane – methanol      | Lead-like enhanced extract: Combined dichloromethane and methanol extracts of degreased (hexane) material, tannin depleted by polyamide SPE | n.d.                                                                | n.d.    | n.d.                                                                                                                                                                                                                                                                                                                                                              | 25 and 100 $\mu$ g/ml <sup>2</sup>  | Lifespan            | Death Time 50 (DT50)                                                    | N2                                               | L4 | OP50                  | S medium                      | Diluted in liquid                  | 1% DMSO   | No effect                                | n.d.                 |
| <i>Acer saccharum</i>                                                               | Sapindaceae   | Phloem juice | Maple Syrup                     | Maple Syrup                                                                                                                                 | n.d.                                                                | GC-MS   | Four constituents identified in EtOAc fraction (catechol, gallic acid, 3,4-dihydroxybenzaldehyde, syringaldehyde)                                                                                                                                                                                                                                                 | 4% <sup>11</sup>                    | Neurodegeneration   | Paralysis assay with age-dependent TDP-43 toxicity of GABAergic neurons | Trangene worm with genotype unc-47p::TDP-43A31ST | L4 | OP50                  | Solid agar                    | added directly to the NGM          | 0% DMSO   | Improved                                 | daf-16               |
|                                                                                     |               |              |                                 |                                                                                                                                             |                                                                     |         |                                                                                                                                                                                                                                                                                                                                                                   |                                     |                     | neurodegeneration monitored by GFP tagged unc-47 in GABAergic neurons   |                                                  |    |                       |                               |                                    |           | Trangene worm with genotype unc-47p::GFP |                      |
|                                                                                     |               |              |                                 | Fraction of maple syrup obtained by SPE with XAD-16 resin, removal of sugars with water,                                                    | Total sugars, total phenols                                         | HPLC-UV | 37 constituents were tentatively identified by HPLC-DAD and comparison to reference compounds (e.g. 4-hydroxy-2-                                                                                                                                                                                                                                                  | 50–500 $\mu$ g/mL <sup>144</sup>    | Proteotoxicity      | Paralysis assay with temperature-dependent amyloid beta expression in   | CL4176                                           | L1 | OP50                  | Solid agar                    | added directly to the NGM          | 0% DMSO   | Improved                                 | n.d.                 |





|                               |                            |                            |                                                                                                  |                               |                                                 |                                 |                                                                                                                                                                                                   |                                  |                                                               |                                                                                              |               |          |                   |                   |                     |                            |           |                                  |                      |
|-------------------------------|----------------------------|----------------------------|--------------------------------------------------------------------------------------------------|-------------------------------|-------------------------------------------------|---------------------------------|---------------------------------------------------------------------------------------------------------------------------------------------------------------------------------------------------|----------------------------------|---------------------------------------------------------------|----------------------------------------------------------------------------------------------|---------------|----------|-------------------|-------------------|---------------------|----------------------------|-----------|----------------------------------|----------------------|
| <i>Anacardium occidentale</i> | Anacardiaceae              | Leaves                     | methanol                                                                                         | extract and CHCl <sub>3</sub> | total phenolic content, total flavonoid content | HPLC-MS, GC-MS                  | n.d.                                                                                                                                                                                              | 1, 2.5 and 5 µg/ml <sup>33</sup> | Lifespan elongation                                           | Mean lifespan                                                                                | N2            | L4       | OP50              | Solid agar        | Extracts in E. coli | 1% DMSO                    | Improved  | <i>daf-16, skn-1</i>             |                      |
|                               |                            |                            |                                                                                                  | Pharyngeal pumping            |                                                 |                                 |                                                                                                                                                                                                   |                                  | Pumping rate                                                  | Improved                                                                                     |               |          |                   |                   |                     |                            |           |                                  |                      |
|                               |                            |                            |                                                                                                  | Autofluorescence              |                                                 |                                 |                                                                                                                                                                                                   |                                  | Filter (360-370/460) microscopy + image processing            | BA17                                                                                         |               |          |                   |                   |                     |                            | Improved  |                                  |                      |
|                               |                            |                            |                                                                                                  | ROS stress survival           |                                                 |                                 |                                                                                                                                                                                                   |                                  | Induced with 80 µM juglone                                    | N2                                                                                           | L1            | S Medium | Diluted in liquid | Improved          |                     |                            |           |                                  |                      |
|                               |                            |                            |                                                                                                  | ROS levels                    |                                                 |                                 |                                                                                                                                                                                                   |                                  | Measurement of intracellular dichlorofluorescein fluorescence |                                                                                              |               |          |                   | Improved          |                     |                            |           |                                  |                      |
|                               |                            |                            |                                                                                                  | Nuclear translocation         |                                                 |                                 |                                                                                                                                                                                                   |                                  | DAF-16::GFP                                                   | TJ356                                                                                        | Improved      |          |                   |                   |                     |                            |           |                                  |                      |
|                               | SKN-1::GFP                 | LD1                        | Improved                                                                                         |                               |                                                 |                                 |                                                                                                                                                                                                   |                                  |                                                               |                                                                                              |               |          |                   |                   |                     |                            |           |                                  |                      |
|                               | <i>Syzygium aromaticum</i> | Myrtaceae                  | Flowers                                                                                          | dichloromethane – methanol    | Crude extract                                   | Total phenols, total flavonoids | HPLC-MS, GC-MS                                                                                                                                                                                    | n.d.                             | 25, 50 and 100 µg/ml <sup>33</sup>                            | Lifespan elongation                                                                          | Mean lifespan | N2       | L4                | OP50              | Solid agar          | Extracts in E. coli        | 1% DMSO   | Improved                         | <i>daf-16, skn-1</i> |
|                               |                            |                            |                                                                                                  |                               | Pharyngeal pumping                              |                                 |                                                                                                                                                                                                   |                                  |                                                               | Pumping rate                                                                                 | Improved      |          |                   |                   |                     |                            |           |                                  |                      |
|                               |                            |                            |                                                                                                  |                               | Autofluorescence                                |                                 |                                                                                                                                                                                                   |                                  |                                                               | Filter (360-370/460) microscopy + image processing                                           | BA17          |          |                   |                   |                     |                            |           | Improved                         |                      |
|                               |                            |                            |                                                                                                  |                               | ROS stress survival                             |                                 |                                                                                                                                                                                                   |                                  |                                                               | Induced with 80 µM juglone                                                                   | N2            | L1       | S Medium          | Diluted in liquid | Improved            |                            |           |                                  |                      |
|                               |                            |                            |                                                                                                  |                               | ROS levels                                      |                                 |                                                                                                                                                                                                   |                                  |                                                               | Measurement of intracellular dichlorofluorescein fluorescence                                |               |          |                   |                   | Improved            |                            |           |                                  |                      |
| Nuclear translocation         |                            |                            |                                                                                                  |                               | DAF-16::GFP                                     |                                 |                                                                                                                                                                                                   |                                  |                                                               | TJ356                                                                                        | Improved      |          |                   |                   |                     |                            |           |                                  |                      |
| SKN-1::GFP                    |                            | LD1                        | No effect                                                                                        |                               |                                                 |                                 |                                                                                                                                                                                                   |                                  |                                                               |                                                                                              |               |          |                   |                   |                     |                            |           |                                  |                      |
| <i>Syzygium nervosum</i>      |                            | Fruits                     | Ethanol                                                                                          | Crude extract                 | Total antioxidants                              | n.d.                            | n.d.                                                                                                                                                                                              | 1-100 µg/mL <sup>146</sup>       | Lifespan                                                      | Mean median and mean maximum                                                                 | N2            | A        | OP50              | M9 buffer         | Diluted in liquid   | n.d. concentration of DMSO | Improved  | <i>daf-16, skn-1 and sir-2.1</i> |                      |
|                               |                            |                            |                                                                                                  |                               |                                                 |                                 |                                                                                                                                                                                                   |                                  | Pharyngeal pumping                                            | Pumping rate                                                                                 |               |          |                   | Solid NGM agar    | Swapped onto plate  |                            | No effect |                                  |                      |
|                               |                            |                            |                                                                                                  |                               |                                                 |                                 |                                                                                                                                                                                                   |                                  | Autofluorescence                                              | microscopy + Image processing (n.d. filter)                                                  |               |          |                   | M9 buffer         | Diluted in liquid   |                            | Improved  |                                  |                      |
| <i>Syzygium jambos</i>        |                            | Leaves                     | Methanol                                                                                         | Crude extract                 | Total phenols, Total antioxidants               | HPLC-MS/MS                      | HPLC-MS <sup>2</sup> dereplication of 17 constituents (e.g. quercetin 3-O-xylosyl-(1→2) rhamnoside, myricetin 3-O-xylosyl-(1→2) rhamnoside, ellagic acid rhamnoside, hexahydroxydiphenylhexoside) | 50 - 200 µg/mL <sup>147</sup>    | ROS stress survival                                           | Induced with 80 µM juglone                                                                   | N2            | L1       | OP50              | S Medium          | Diluted in liquid   | 0% DMSO                    | Improved  | <i>daf-16</i>                    |                      |
|                               |                            |                            |                                                                                                  |                               |                                                 |                                 |                                                                                                                                                                                                   |                                  | ROS levels                                                    | Measurement of intracellular dichlorofluorescein fluorescence; microscopy + Image Processing |               |          |                   |                   |                     |                            | Improved  |                                  |                      |
|                               | Nuclear translocation      |                            |                                                                                                  |                               |                                                 |                                 |                                                                                                                                                                                                   |                                  | DAF-16::GFP                                                   | TJ356                                                                                        |               |          |                   |                   |                     |                            | Improved  |                                  |                      |
| <i>Pimenta dioica</i>         | Fruits                     | dichloromethane – methanol | Lead-like enhanced extract: Combined dichloromethane and methanol extracts of degreased (hexane) | n.d.                          | n.d.                                            | n.d.                            | 25 and 100 µg/ml <sup>2</sup>                                                                                                                                                                     | Lifespan                         | Death Time 50 (DT50)                                          | N2                                                                                           | L4            | OP50     | S medium          | Diluted in liquid | 1% DMSO             | Improved                   | n.d.      |                                  |                      |

|                               |            |               |                                   |                                                                  |                                   |             |                                                                                                                                                                                                                                                                                                                                                                                                                  |                                                             |                                       |                                                                                                                           |      |      |                       |                    |                                                |          |          |               |          |          |
|-------------------------------|------------|---------------|-----------------------------------|------------------------------------------------------------------|-----------------------------------|-------------|------------------------------------------------------------------------------------------------------------------------------------------------------------------------------------------------------------------------------------------------------------------------------------------------------------------------------------------------------------------------------------------------------------------|-------------------------------------------------------------|---------------------------------------|---------------------------------------------------------------------------------------------------------------------------|------|------|-----------------------|--------------------|------------------------------------------------|----------|----------|---------------|----------|----------|
| <i>Eugenia uniflora</i>       |            | Fruits        | Ethanol                           | Crude extract                                                    | n.d.                              | HPLC- MS-MS | HPLC-MS <sup>2</sup> dereplication of 27 constituents + identification/quantification using references (e.g. delphinidin 3-O-glucoside cyaninidin 3-O-glucoside, pelargonidin 3-O-glucoside, quercetin, quercetin glycosides, myricetin, myricetin glycosides, quinic acid, galloylquinic acid, galloyl hexoside)                                                                                                | 5, 50, 100, 250 and 500 µg <sup>148</sup>                   | Lifespan elongation                   | n.d.                                                                                                                      | N2   | L1   | No food               | 0.5% NaCl solution | Diluted in liquid                              | n.d.     | Improved | <i>daf-16</i> |          |          |
|                               |            |               |                                   |                                                                  |                                   |             |                                                                                                                                                                                                                                                                                                                                                                                                                  |                                                             | thermal stress survival               | Induced with 35 °C                                                                                                        |      |      |                       |                    |                                                |          | Improved |               |          |          |
|                               |            |               |                                   |                                                                  |                                   |             |                                                                                                                                                                                                                                                                                                                                                                                                                  |                                                             | ROS stress survival                   | Induced with 0.6 mM H <sub>2</sub> O <sub>2</sub>                                                                         |      |      |                       |                    |                                                |          | Improved |               |          |          |
|                               |            |               |                                   |                                                                  |                                   |             |                                                                                                                                                                                                                                                                                                                                                                                                                  |                                                             |                                       | Induced with 75 µM juglone                                                                                                |      |      |                       |                    |                                                |          | Improved |               |          |          |
|                               |            |               |                                   |                                                                  |                                   |             |                                                                                                                                                                                                                                                                                                                                                                                                                  |                                                             | Antioxidant capacity                  | Measurement of dichlorofluorescein fluorescence after incubation with 0.6 mM H <sub>2</sub> O <sub>2</sub> ; plate reader |      |      |                       |                    |                                                |          |          |               | L1       | Improved |
|                               |            |               |                                   |                                                                  |                                   |             |                                                                                                                                                                                                                                                                                                                                                                                                                  |                                                             | Oxidative damage to proteins          | Measurement of dinitrophenylhydrazine absorbance in worm lysates with spectrophotometer                                   |      |      |                       |                    |                                                |          |          |               |          | Improved |
|                               |            |               |                                   |                                                                  |                                   |             |                                                                                                                                                                                                                                                                                                                                                                                                                  |                                                             | Nuclear translocation                 | DAF-16::GFP                                                                                                               |      |      |                       |                    |                                                |          | TJ356    |               | L4       | Improved |
| <i>Eugenia supraaxillaris</i> |            | leaves        | hydro methanolic (75%)            | Extract was defatted with liquid-liquid partition (water-hexane) | Total phenols, total antioxidants | HPLC-UV-MS  | Five compounds were isolated with polyamide chromatography and characterized by NMR (gallic acid, 2, 6 di-O-(α/β)- <sup>4</sup> C1- galloyl glucose, nilocitin, myricetin-3-O-xylopyranosyl(1 → 2)-α- <sup>1</sup> C4-rhamnopyranoside, myricetin 3-O-α- <sup>1</sup> C4-rhamnopyranoside); 27 compounds tentatively identified using HPLC-MS (e.g. galloyl glucose, sinapic acid hexoside, myricetin pentoside) | 50, 100 and 200 µg/mL <sup>36</sup>                         | ROS stress survival                   | Induced with 80 µM juglone                                                                                                | N2   | L1   | OP50                  | S medium           | Diluted in liquid                              | 0% DMSO  | Improved | <i>daf-16</i> |          |          |
|                               |            |               |                                   |                                                                  |                                   |             |                                                                                                                                                                                                                                                                                                                                                                                                                  |                                                             | ROS levels                            | Measurement of intracellular dichlorofluorescein fluorescence; microscopy + Image Processing                              |      |      |                       |                    |                                                |          | Improved |               |          |          |
|                               |            |               |                                   |                                                                  |                                   |             |                                                                                                                                                                                                                                                                                                                                                                                                                  |                                                             | Nuclear translocation                 | DAF-16::GFP                                                                                                               |      |      |                       |                    |                                                |          | TJ356    |               | Improved |          |
| <i>Punica granatum</i>        | Lythraceae | Fruits        | Aqueous                           | Fruit juice                                                      | n.d.                              | n.d.        | n.d.                                                                                                                                                                                                                                                                                                                                                                                                             | 0.01%, 0.1%, 1%, 3%, 5%, 10% and 25 % (v/v) <sup>39</sup>   | Lifespan                              | Mean lifespan                                                                                                             | N2   | L4   | OP50                  | S medium           | Diluted in liquid                              | 0% DMSO  | Improved | n.d.          |          |          |
|                               |            | Fruits        | Ethanol                           | Crude extract                                                    | n.d.                              | n.d.        | n.d.                                                                                                                                                                                                                                                                                                                                                                                                             | 1.25, 2.5, 5, 10 and 20 mg/ml <sup>149</sup>                | Lifespan                              | Mean lifespan                                                                                                             | N2   | L4   | Heat-inactivated OP50 | Solid agar         | Diluted in liquid NGM before pouring to plates | 0% DMSO  | Improved | n.d.          |          |          |
|                               |            | Fruit pomace  | n.d.                              | Commercial polyphenol enriched fraction of the pomace extract    | n.d.                              | n.d.        | n.d.                                                                                                                                                                                                                                                                                                                                                                                                             | 5, 10, 20, 40, 80, 160, and 320 µg/ml <sup>39</sup>         | Lifespan                              | Mean lifespan                                                                                                             | N2   | L4   | OP50                  | S medium           | Diluted in liquid                              | 0% DMSO  | Improved | <i>daf-16</i> |          |          |
|                               |            | Fruit peel    | Hexane                            | Crude extract                                                    | Total antioxidants, total phenols | n.d.        | n.d.                                                                                                                                                                                                                                                                                                                                                                                                             | n.d.                                                        | 100, 300 and 500 µg/mL <sup>150</sup> | Lifespan                                                                                                                  | n.d. | N2   | L4                    | OP50               | Solid agar                                     | n.d.     | n.d.     | No effect     | n.d.     |          |
|                               |            |               | Ethylacetat                       | Crude extract                                                    | Total antioxidants, total phenols | n.d.        | n.d.                                                                                                                                                                                                                                                                                                                                                                                                             | Several constituents were tentatively identified with GC-MS | 100, 300 and 500 µg/mL <sup>150</sup> | Lifespan                                                                                                                  | n.d. | N2   | L4                    | OP50               | Solid agar                                     | n.d.     | n.d.     | Improved      | n.d.     |          |
|                               | Methanol   | Crude extract | Total antioxidants, total phenols | n.d.                                                             | n.d.                              | n.d.        | 100, 300 and 500 µg/mL <sup>150</sup>                                                                                                                                                                                                                                                                                                                                                                            | Lifespan                                                    | n.d.                                  | N2                                                                                                                        | L4   | OP50 | Solid agar            | n.d.               | n.d.                                           | Improved | n.d.     |               |          |          |

|                                      |               |         |                            |                                                                                                                                                                       |                                                  |                      |                                                                                                                                                                                                                                                                                                                                                            |                                         |                                 |                                                                                                                             |    |         |      |            |                                             |           |                         |                          |
|--------------------------------------|---------------|---------|----------------------------|-----------------------------------------------------------------------------------------------------------------------------------------------------------------------|--------------------------------------------------|----------------------|------------------------------------------------------------------------------------------------------------------------------------------------------------------------------------------------------------------------------------------------------------------------------------------------------------------------------------------------------------|-----------------------------------------|---------------------------------|-----------------------------------------------------------------------------------------------------------------------------|----|---------|------|------------|---------------------------------------------|-----------|-------------------------|--------------------------|
| <i>Terminalia chebula</i>            | Combr etaceae | Fruits  | dichloromethane – methanol | Lead-like enhanced extract: Combined dichloromethane and methanol extracts of degreased (hexane) material, tannin depleted by polyamide SPE                           | n.d.                                             | n.d.                 | n.d.                                                                                                                                                                                                                                                                                                                                                       | 25 and 100 µg/ml <sup>2</sup>           | Lifespan                        | Death Time 50 (DT50)                                                                                                        | N2 | L4      | OP50 | S medium   | Diluted in liquid                           | 1% DMSO   | No effect               | n.d.                     |
| <i>Paeonia lactiflora</i>            | Paeoniaceae   | Stamens | Aqueous (70%)              | Crude extract                                                                                                                                                         | Total antioxidants                               | HPLC-MS <sup>2</sup> | Several compounds were tentatively identified with HPLC-MS <sup>2</sup> (e.g. isorhamnetin-3,7-O-diglucoside, Naringenin-4'-O-glucoside, dihydrokaempferol-7-O-glucoside, 6-hydroxykaempferol-3,6-O-diglucoside, spiraeoside, phenolic acids, oxypaeoniflorin, paeoniflorin, 8-debenzoylpaeoniflorin, trigonelline, 3-O-galloyl-glucose and digallic acid) | 0.2 - 1.2 mg/mL <sup>151</sup>          | Lifespan                        | Mean and maximum lifespan                                                                                                   | N2 | L4      | OP50 | Solid agar | added to the NGM before OP50 were spread    | 0% DMSO   | Improved                | n.d.                     |
|                                      |               |         |                            |                                                                                                                                                                       |                                                  |                      |                                                                                                                                                                                                                                                                                                                                                            |                                         | Locomotion                      | Number of head thrashes, body bends                                                                                         |    |         |      |            |                                             |           |                         |                          |
|                                      |               |         |                            |                                                                                                                                                                       |                                                  |                      |                                                                                                                                                                                                                                                                                                                                                            |                                         | Autofluorescence                | 525 nm bandpass filter; microscopy + image processing                                                                       |    |         |      |            |                                             |           |                         |                          |
|                                      |               |         |                            |                                                                                                                                                                       |                                                  |                      |                                                                                                                                                                                                                                                                                                                                                            |                                         | Thermal stress survival         | Induced with 37°C                                                                                                           |    |         |      |            |                                             |           |                         |                          |
|                                      |               |         |                            |                                                                                                                                                                       |                                                  |                      |                                                                                                                                                                                                                                                                                                                                                            |                                         | ROS stress survival             | Induced with 200 µM paraquat                                                                                                |    |         |      |            |                                             |           |                         |                          |
| <i>Viscum album coloratum</i>        | Santalaceae   | Herb    | Aqueous                    | Crude extract                                                                                                                                                         | n.d.                                             | n.d.                 | n.d.                                                                                                                                                                                                                                                                                                                                                       | 50 or 200 µg/ml <sup>152</sup>          | Lifespan<br>ROS stress survival | Mean lifespan<br>Induced with 20 mM paraquat                                                                                | N2 | A<br>L1 | n.d. | Solid agar | added to standard normal growth agar plates | n.d.      | Improved<br>Detrimental | sir-2.1                  |
| <i>Ximenia americana var. caffra</i> | Olacaceae     | Leaves  | Methanol                   | Crude extract                                                                                                                                                         | Total phenols, total antioxidants                | HPLC-MS <sup>2</sup> | 23 compounds tentatively identified with HPLC-MS <sup>2</sup> (e.g. rutin, isoquercetin, and avicularin, kaempferol 3-O-glucoside, kaempferol 3-neohesperidoside, and kaempferol 3-O-arabinoside, procyanidin B1, epicatechin, and catechin, quinic acid)                                                                                                  | 25, 50 and 100 µg/mL <sup>35</sup>      | ROS stress survival             | Induced with 80 µM juglone                                                                                                  | N2 | L1      | OP50 | S medium   | Diluted in liquid                           | 0% DMSO   | Improved                | daf-16                   |
|                                      |               |         |                            |                                                                                                                                                                       |                                                  |                      |                                                                                                                                                                                                                                                                                                                                                            |                                         | Antioxidant capacity            | Measurement of intracellular dichlorofluorescein fluorescence after treatment with juglone; microscopy and image processing |    |         |      |            |                                             |           |                         |                          |
|                                      |               |         |                            |                                                                                                                                                                       |                                                  |                      |                                                                                                                                                                                                                                                                                                                                                            |                                         | Nuclear translocation           | DAF-16::GFP                                                                                                                 |    |         |      |            |                                             |           |                         |                          |
| <i>Portulaca oleracea</i>            | Portulacaceae | n.d.    | Hydroethanolic (45%)       | Ethylacetate fraction generated as followed (crude extract was suspended in water and fractionally extracted with petroleum ether, chloroform and then ethyl acetate) | n.d.                                             | HPLC-UV              | Twelve phenolic acids and flavonoids identified and quantified with HPLC-UV and reference compounds (p-coumaric acid, salicylic acid, rosmarinic acid, vanillic acid, ferulic acid dihydroxy-benzoic acid, p-hydroxy-benzoic acid, caffeic acid, syringic acid, genistin, quercitrin hesperidin)                                                           | 0, 250, 500, 1,000 µg/mL <sup>153</sup> | Lifespan                        | Mean lifespan                                                                                                               | N2 | L4      | OP50 | Solid agar | Added to the OP50 spreaded NGM surface      | 0.2% DMSO | Improved                | daf-16, sod-3, and cat-1 |
|                                      |               |         |                            |                                                                                                                                                                       |                                                  |                      |                                                                                                                                                                                                                                                                                                                                                            |                                         | Locomotion                      | Motility classes                                                                                                            |    |         |      |            |                                             |           |                         |                          |
|                                      |               |         |                            |                                                                                                                                                                       |                                                  |                      |                                                                                                                                                                                                                                                                                                                                                            |                                         | Autofluorescence                | DAPI filter; microscopy + image processing                                                                                  |    |         |      |            |                                             |           |                         |                          |
|                                      |               |         |                            |                                                                                                                                                                       |                                                  |                      |                                                                                                                                                                                                                                                                                                                                                            |                                         | Thermal stress survival         | Induced with 35°C                                                                                                           |    |         |      |            |                                             |           |                         |                          |
|                                      |               |         |                            |                                                                                                                                                                       |                                                  |                      |                                                                                                                                                                                                                                                                                                                                                            |                                         | UV stress survival              | Induced with UV-B 1200 J/m <sup>2</sup>                                                                                     |    |         |      |            |                                             |           |                         |                          |
|                                      |               |         |                            |                                                                                                                                                                       |                                                  |                      |                                                                                                                                                                                                                                                                                                                                                            |                                         | ROS stress survival             | Induced with 40 mM paraquat                                                                                                 |    |         |      |            |                                             |           |                         |                          |
|                                      |               |         |                            |                                                                                                                                                                       |                                                  |                      |                                                                                                                                                                                                                                                                                                                                                            |                                         | ROS levels                      | Measurement of intracellular dichlorofluorescein fluorescence; plate reader                                                 |    |         |      |            |                                             |           |                         |                          |
| <i>Coccoloba alnifolia</i>           | Polygonaceae  | Leaves  | Ethanol                    | Crude extract of degreased leaves (hexane & chloroform)                                                                                                               | Total sugars, phenols, proteins and antioxidants | TLC and HPLC-DAD     | 4 compounds tentatively identified using TLC and HPLC-DAD and reference compounds (gallic acid, p-coumaric acid, vitexin, isovitexin)                                                                                                                                                                                                                      | 1 and 10 mg/ml <sup>154</sup>           | ROS stress survival             | Induced with 8 mM tert-butyl hydrogen peroxide                                                                              | N2 | L1      | OP50 | Solid agar | added to the NGM                            | 0% DMSO   | Improved                | n.d.                     |
|                                      |               |         | Aqueous                    | Crude extract of previously extracted material (hexane, chloroform, ethanol,                                                                                          | Total sugars, phenols, proteins and antioxidants | TLC and HPLC-DAD     | 4 compounds tentatively identified using TLC and HPLC-DAD and reference compounds (gallic acid, p-                                                                                                                                                                                                                                                         | 1 and 10 mg/ml <sup>154</sup>           | ROS stress survival             | Induced with 8 mM tert-butyl hydrogen peroxide                                                                              | N2 | L1      | OP50 | Solid agar | added to the NGM                            | 0% DMSO   | Improved                | n.d.                     |

|                              |               |                       |                                                         |                                                                                      |      |         |                                      |                                      |                                                                             |                                                                   |    |      |                               |                                              |                              |            |           |                                                     |          |
|------------------------------|---------------|-----------------------|---------------------------------------------------------|--------------------------------------------------------------------------------------|------|---------|--------------------------------------|--------------------------------------|-----------------------------------------------------------------------------|-------------------------------------------------------------------|----|------|-------------------------------|----------------------------------------------|------------------------------|------------|-----------|-----------------------------------------------------|----------|
|                              |               |                       |                                                         | methanol)                                                                            |      |         | coumaric acid, vitexin, isovitexin)  |                                      |                                                                             |                                                                   |    |      |                               |                                              |                              |            |           |                                                     |          |
| <i>Achyranthes bidentata</i> | Amaranthaceae | Roots                 | Butyl-methyl ether - methanol                           | Combined crude extracts of (1) butyl-methyl ether (MTBE) - methanol and (2) methanol | n.d. | HPLC-MS | n.d.                                 | 30 µg/ml <sup>49</sup>               | Thermal stress survival                                                     | Induced with 37 °C                                                | N2 | L4   | OP50                          | Solid NGM agar                               | added to the NGM agar plates | 0.05% DMSO | No effect | n.d.                                                |          |
| <i>Opuntia ficus-indica</i>  | Cactaceae     | yellow fruits         | Aqueous                                                 |                                                                                      |      | n.d.    | n.d.                                 | 0.1, 0.5, 1% w/v <sup>82</sup>       | Lifespan elongation                                                         | Mean lifespan after 2 d of treatment measured by lifespan machine | N2 | L1   | heat inactivated E. coli OP50 | Liquid M9/S medium mixture                   | Diluted in liquid            | 0% DMSO    | Improved  |                                                     |          |
|                              |               | Red fruits            | Aqueous                                                 |                                                                                      |      | n.d.    | n.d.                                 | 0.1, 0.5, 1% w/v <sup>82</sup>       | Lifespan elongation                                                         | Mean lifespan after 2 d of treatment measured by lifespan machine | N2 | L1   | heat inactivated E. coli OP50 | Liquid M9/S medium mixture                   | Diluted in liquid            | 0% DMSO    | No effect |                                                     |          |
| <i>Vaccinium corymbosum</i>  | Ericaceae     | Fruits                | Aqueous acetone (80%)                                   | Crude extract                                                                        | n.d. | n.d.    | n.d.                                 | 50, 100 and 200 mg/mL <sup>155</sup> | Lifespan                                                                    | Mean lifespan                                                     | N2 | A    | OP50                          | Solid agar                                   | n.d.                         | n.d.       | Improved  | daf-16, cat-1, sod-3, skn-1, sek-1, nhr-8 and mev-1 |          |
|                              |               |                       |                                                         |                                                                                      |      |         |                                      |                                      | Locomotion                                                                  | Motility classes                                                  |    |      |                               |                                              |                              |            |           |                                                     | Improved |
|                              |               |                       |                                                         |                                                                                      |      |         |                                      |                                      | Autofluorescence                                                            | Microscopy + image processing (n.d. filter)                       |    |      |                               |                                              |                              |            |           |                                                     | Improved |
|                              |               |                       |                                                         |                                                                                      |      |         |                                      |                                      | thermal stress survival                                                     | Induced with 35 °C                                                |    |      |                               |                                              |                              |            |           |                                                     | Improved |
|                              |               |                       |                                                         |                                                                                      |      |         |                                      |                                      | UV stress survival                                                          | Induced with UV-B (120 mJ/cm <sup>2</sup> )                       |    |      |                               |                                              |                              |            |           |                                                     | Improved |
|                              |               |                       |                                                         |                                                                                      |      |         |                                      |                                      | ROS stress survival                                                         | Induced with 5 mM paraquat                                        |    |      |                               |                                              |                              |            |           |                                                     | Improved |
|                              |               |                       |                                                         |                                                                                      |      |         |                                      |                                      | ROS levels                                                                  | Measurement of intracellular dichlorofluorescein fluorescence     |    |      |                               |                                              |                              |            |           |                                                     | Improved |
| <i>Vaccinium vitis-idaea</i> | Fruits        | Aqueous acetone (80%) | Crude extract                                           | n.d.                                                                                 | n.d. | n.d.    | 50 and 400 µg/mL <sup>102</sup>      | Lifespan                             | Mean lifespan                                                               | N2                                                                | A  | OP50 | NGM                           | Mixed with NGM                               | 0% DMSO                      | Improved   | daf-16    |                                                     |          |
|                              |               |                       |                                                         |                                                                                      |      |         |                                      | Nuclear translocation                | DAF-16::GFP                                                                 |                                                                   |    |      |                               |                                              |                              |            |           | TJ356                                               |          |
|                              |               |                       |                                                         |                                                                                      |      |         |                                      |                                      | HSF1::GFP                                                                   |                                                                   |    |      |                               |                                              |                              |            |           | OG497                                               |          |
| <i>Vaccinium uliginosum</i>  | Fruits        | Aqueous acetone (80%) | Crude extract                                           | n.d.                                                                                 | n.d. | n.d.    | 50 and 200 µg/mL <sup>102</sup>      | Lifespan                             | Mean lifespan                                                               | N2                                                                | A  | OP50 | NGM                           | Mixed with NGM                               | 0% DMSO                      | Improved   | daf-16    |                                                     |          |
|                              |               |                       |                                                         |                                                                                      |      |         |                                      | Nuclear translocation                | DAF-16::GFP                                                                 |                                                                   |    |      |                               |                                              |                              |            |           | TJ356                                               |          |
|                              |               |                       |                                                         |                                                                                      |      |         |                                      |                                      | HSF1::GFP                                                                   |                                                                   |    |      |                               |                                              |                              |            |           | OG497                                               |          |
|                              |               | Aqueous acetone (80%) | Crude extract                                           | Total phenols, total anthocyanins                                                    | n.d. | n.d.    | 100, 200 and 400 µg/mL <sup>28</sup> | Lifespan                             | Mean and Median lifespan                                                    | OW13                                                              | L4 | OP50 | Solid agar                    | spread on top of NGM plates seeded with OP50 | 0.1% DMSO                    | No effect  | sir-2.1   |                                                     |          |
|                              |               |                       |                                                         |                                                                                      |      |         |                                      | Locomotion                           | Motility Classes                                                            |                                                                   |    |      |                               |                                              |                              |            |           |                                                     |          |
|                              |               |                       |                                                         |                                                                                      |      |         |                                      | ROS levels                           | Measurement of intracellular dichlorofluorescein fluorescence               |                                                                   |    |      |                               |                                              |                              |            |           |                                                     |          |
|                              |               |                       |                                                         |                                                                                      |      |         |                                      | Proteotoxicity                       | YFP tagged α-synuclein expression in muscles, Microscopy & image processing |                                                                   |    |      |                               |                                              |                              |            |           |                                                     |          |
|                              |               |                       |                                                         |                                                                                      |      |         |                                      |                                      |                                                                             |                                                                   |    |      |                               |                                              |                              |            |           | heat-inactivated OP50                               |          |
|                              |               |                       |                                                         |                                                                                      |      |         |                                      |                                      |                                                                             |                                                                   |    |      |                               |                                              |                              |            |           |                                                     |          |
|                              |               | Aqueous acetone (80%) | Fraction enriched in proanthocyanidins (n.d. procedure) | n.d.                                                                                 | n.d. | n.d.    | 400 µg/mL <sup>28</sup>              | Proteotoxicity                       | YFP tagged α-synuclein expression in muscles, Microscopy & image processing | OW13                                                              | L4 | OP50 | Solid agar                    | spread on top of NGM plates seeded with OP50 | 0.1% DMSO                    | Improved   | sir-2.1   |                                                     |          |
|                              |               |                       |                                                         |                                                                                      |      |         |                                      |                                      |                                                                             |                                                                   |    |      |                               |                                              |                              |            |           |                                                     |          |
|                              |               |                       |                                                         |                                                                                      |      |         |                                      |                                      |                                                                             |                                                                   |    |      |                               |                                              |                              |            |           |                                                     |          |
|                              |               |                       |                                                         |                                                                                      |      |         | 400 µg/mL <sup>28</sup>              | Proteotoxicity                       | YFP tagged α-synuclein expression in muscles, Microscopy & image processing | OW13                                                              | L4 | OP50 | Solid agar                    | spread on top of NGM plates seeded with      | 0.1% DMSO                    | Improved   | sir-2.1   |                                                     |          |



|                         |             |                        |                                                         |                                          |                    |                                                                                                                                                                                                                                              |                                                                                              |                            |                                                                      |                                                                                          |       |      |                            |                         |                    |             |                                        |           |          |          |
|-------------------------|-------------|------------------------|---------------------------------------------------------|------------------------------------------|--------------------|----------------------------------------------------------------------------------------------------------------------------------------------------------------------------------------------------------------------------------------------|----------------------------------------------------------------------------------------------|----------------------------|----------------------------------------------------------------------|------------------------------------------------------------------------------------------|-------|------|----------------------------|-------------------------|--------------------|-------------|----------------------------------------|-----------|----------|----------|
|                         |             |                        |                                                         |                                          |                    |                                                                                                                                                                                                                                              |                                                                                              |                            |                                                                      | and image processing                                                                     |       |      |                            |                         |                    |             |                                        |           |          |          |
|                         |             |                        |                                                         |                                          |                    |                                                                                                                                                                                                                                              |                                                                                              |                            | Thermal stress survival                                              | Induced with 34°C                                                                        |       |      |                            |                         |                    |             |                                        |           | Improved |          |
|                         |             |                        |                                                         |                                          |                    |                                                                                                                                                                                                                                              |                                                                                              |                            | ROS stress survival                                                  | Induced with 200 mM paraquat                                                             |       |      |                            |                         |                    |             |                                        |           | Improved |          |
|                         |             |                        |                                                         |                                          |                    |                                                                                                                                                                                                                                              |                                                                                              |                            | Nuclear translocation                                                | DAF-16::GFP                                                                              | TJ356 |      |                            |                         |                    |             |                                        |           | Improved |          |
| <i>Capsicum annuum</i>  | Solana ceae | Fruits                 | Hydroe thanolic                                         | fraction enriched in capsaicinglycosides | Total antioxidants | HPLC-MS <sup>2</sup>                                                                                                                                                                                                                         | Capsaicinglycosides and Dihydrocapsaicinglycoside tentatively identified via MS <sup>2</sup> | 50 ug/ml <sup>159</sup>    | Lifespan                                                             | Mean lifespan                                                                            | N2    | L4   | heat-killed E. coli (OP50) | S-medium                | Dilute d in liquid | 0.1% DMSO   | No effect                              | No effect | Improved |          |
|                         |             |                        |                                                         |                                          |                    |                                                                                                                                                                                                                                              |                                                                                              |                            | Pharyngeal pumping                                                   | Pumping rate                                                                             |       |      |                            |                         |                    |             |                                        |           |          | Improved |
|                         |             |                        |                                                         |                                          |                    |                                                                                                                                                                                                                                              |                                                                                              |                            | ROS stress survival                                                  | Induced with 40 mM H <sub>2</sub> O <sub>2</sub>                                         |       |      |                            |                         |                    |             |                                        |           |          | Improved |
|                         |             |                        |                                                         |                                          |                    |                                                                                                                                                                                                                                              |                                                                                              |                            | Antioxidant capacity                                                 | Measurement of dichlorofluorescein fluorescence without or after incubation with juglone |       |      |                            |                         |                    |             |                                        |           |          | Improved |
|                         |             |                        |                                                         |                                          |                    |                                                                                                                                                                                                                                              |                                                                                              |                            | thermal stress survival                                              | Induced with 37 °C                                                                       |       |      |                            |                         |                    |             |                                        |           |          | Improved |
| <i>Lycium barbarum</i>  | Leaves      | Hydroe thanolic (70%)  | Crude extract                                           | Total flavonoids                         | HPLC-MS            | Several compounds tentatively identified by HPLC-MS (e.g. chrysin, angelicain, neochlorogenic acid, quercetin-3-O-glucuronide, isochlorogenic acid A, rutin, taxifolin 7-rhamnoside, isochlorogenic acid B, daidzin, kaempferol, piperonone) | 200 µg/mL <sup>64</sup>                                                                      | Lifespan                   | Mean and maximum lifespan                                            | N2                                                                                       | L4    | OP50 | Solid agar                 | added into the NGM      | 0.2% DMSO          | Improved    | skn-1, gcs-1                           |           |          |          |
|                         |             |                        |                                                         |                                          |                    |                                                                                                                                                                                                                                              |                                                                                              | Locomotion                 | Motility classes                                                     |                                                                                          |       |      |                            |                         |                    |             |                                        | Improved  |          |          |
|                         | Fruits      | Aqueo us               | Crude extract of previously extracted material (butane) | Total flavonoids                         | HPLC-UV            | Rutin was tentatively identified with HPLC-UV and references                                                                                                                                                                                 | 2 mg/ml <sup>160</sup>                                                                       | Proteotoxicity             | Paralysis assay with constitutive amyloid beta expression in muscles | CL2006                                                                                   | A     | OP50 | Solid agar                 | added into the NGM      | 0% DMSO            | No effect   | ins-18, daf-16, let-60, sir-2.1, skn-1 |           |          |          |
|                         |             |                        |                                                         |                                          |                    |                                                                                                                                                                                                                                              |                                                                                              | Proteotoxicity             | Paralysis assay with constitutive amyloid beta expression in muscles |                                                                                          |       |      |                            |                         |                    |             |                                        | Improved  |          |          |
|                         | Fruits      | Aqueo us acetone (80%) | Crude extract                                           | Total phenols, total flavonoids          | HPLC-UV            | Several compounds tentatively identified with HPLC-UV (e.g. ascorbic acid, gallic acid, pelargonidin, chlorogenic acid)                                                                                                                      | 20, 50, 100 mg/mL <sup>161</sup>                                                             | Lifespan                   | Mean lifespan                                                        | N2                                                                                       | L4    | OP50 | Solid agar                 | added into the bacteria | 0% DMSO            | Improved    | daf-16, hsf-1, sir-2.1                 |           |          |          |
|                         |             |                        |                                                         |                                          |                    |                                                                                                                                                                                                                                              |                                                                                              | Locomotion                 | Motility classes                                                     |                                                                                          |       |      |                            |                         |                    | Improved    |                                        |           |          |          |
|                         |             |                        |                                                         |                                          |                    |                                                                                                                                                                                                                                              |                                                                                              | Pharyngeal pumping         | Pumping rate                                                         |                                                                                          |       |      |                            |                         |                    | Detrimental |                                        |           |          |          |
|                         |             |                        |                                                         |                                          |                    |                                                                                                                                                                                                                                              |                                                                                              | Autofluorescence           | microscopy + Image processing (n.d. filter)                          |                                                                                          |       |      |                            |                         |                    | Improved    |                                        |           |          |          |
|                         |             |                        |                                                         |                                          |                    |                                                                                                                                                                                                                                              |                                                                                              | Thermal stress survival    | Induced with 35°C                                                    |                                                                                          |       |      |                            |                         |                    | Improved    |                                        |           |          |          |
|                         |             |                        |                                                         |                                          |                    |                                                                                                                                                                                                                                              |                                                                                              | UV stress survival         | Induced with UV-B 1200 J/m <sup>2</sup>                              |                                                                                          |       |      |                            |                         |                    | Improved    |                                        |           |          |          |
| ROS stress survival     |             |                        |                                                         |                                          |                    |                                                                                                                                                                                                                                              |                                                                                              | Induced with 5 mM paraquat | Improved                                                             |                                                                                          |       |      |                            |                         |                    |             |                                        |           |          |          |
| Nuclear translocation   | DAF-16::GFP | TJ356                  | n.d.                                                    | Improved                                 |                    |                                                                                                                                                                                                                                              |                                                                                              |                            |                                                                      |                                                                                          |       |      |                            |                         |                    |             |                                        |           |          |          |
| <i>Lycium ruthenium</i> | Fruits      | Aqueo us acetone (80%) | Crude extract                                           | Total phenols, total flavonoids          | HPLC-UV            | Several compounds tentatively identified with HPLC-UV (e.g. pelargonidin, chlorogenic acid, delphinidin)                                                                                                                                     | 2, 5, 10 mg/mL                                                                               | Lifespan                   | Mean lifespan                                                        | N2                                                                                       | L4    | OP50 | Solid agar                 | added into the bacteria | 0% DMSO            | Improved    | daf-16, hsf-1, sir-2.1                 |           |          |          |
|                         |             |                        |                                                         |                                          |                    |                                                                                                                                                                                                                                              |                                                                                              | Locomotion                 | Motility classes                                                     |                                                                                          |       |      |                            |                         |                    | Improved    |                                        |           |          |          |
|                         |             |                        |                                                         |                                          |                    |                                                                                                                                                                                                                                              |                                                                                              | Pharyngeal pumping         | Pumping rate                                                         |                                                                                          |       |      |                            |                         |                    | Detrimental |                                        |           |          |          |
|                         |             |                        |                                                         |                                          |                    |                                                                                                                                                                                                                                              |                                                                                              | Autofluorescence           | Microscopy and image processing (n.d. filter)                        |                                                                                          |       |      |                            |                         |                    | Improved    |                                        |           |          |          |
|                         |             |                        |                                                         |                                          |                    |                                                                                                                                                                                                                                              |                                                                                              | Thermal stress survival    | Induced with 35°C                                                    |                                                                                          |       |      |                            |                         |                    | Improved    |                                        |           |          |          |

|                          |                |                      |                               |                                                                                      |                                                                                                |                                                                                                                                                                           |                                                                                                                                                                                                                                                                                          |                               |                                                                                                |                                                                         |       |      |            |                     |                              |            |                          |                                            |
|--------------------------|----------------|----------------------|-------------------------------|--------------------------------------------------------------------------------------|------------------------------------------------------------------------------------------------|---------------------------------------------------------------------------------------------------------------------------------------------------------------------------|------------------------------------------------------------------------------------------------------------------------------------------------------------------------------------------------------------------------------------------------------------------------------------------|-------------------------------|------------------------------------------------------------------------------------------------|-------------------------------------------------------------------------|-------|------|------------|---------------------|------------------------------|------------|--------------------------|--------------------------------------------|
|                          |                |                      |                               |                                                                                      |                                                                                                |                                                                                                                                                                           |                                                                                                                                                                                                                                                                                          |                               | UV stress survival                                                                             | Induced with UV-B 1200 J/m <sup>2</sup>                                 |       |      |            |                     |                              | Improved   |                          |                                            |
|                          |                |                      |                               |                                                                                      |                                                                                                |                                                                                                                                                                           |                                                                                                                                                                                                                                                                                          |                               | ROS stress survival                                                                            | Induced with 5 mM paraquat                                              |       |      |            |                     |                              | Improved   |                          |                                            |
|                          |                |                      |                               |                                                                                      |                                                                                                |                                                                                                                                                                           |                                                                                                                                                                                                                                                                                          |                               | Nuclear translocation                                                                          | DAF-16::GFP                                                             | TJ356 |      |            |                     |                              | Improved   |                          |                                            |
| <i>Cuscuta chinensis</i> | Convolvulaceae | Seeds                | Butyl-methyl ether – methanol | Combined crude extracts of (1) butyl-methyl ether (MTBE) - methanol and (2) methanol | n.d.                                                                                           | HPLC-MS                                                                                                                                                                   | Several compounds tentatively identified with HPLC-MS (e.g. astragaloside, quercetin glycosides)                                                                                                                                                                                         | 30 µg/ml <sup>49</sup>        | Lifespan                                                                                       | Mean, minimum, median and maximum lifespan                              | N2    | L4   | OP50       | Solid NGM agar      | added to the NGM agar plates | 0.05% DMSO | Improved                 | n.d.                                       |
|                          |                |                      |                               |                                                                                      |                                                                                                |                                                                                                                                                                           |                                                                                                                                                                                                                                                                                          |                               | Locomotion                                                                                     | Wave initiation rate, activity index, brush stroke and body wave number |       |      |            |                     |                              |            | Improved                 |                                            |
|                          |                |                      |                               |                                                                                      |                                                                                                |                                                                                                                                                                           |                                                                                                                                                                                                                                                                                          |                               | Pharyngeal pumping                                                                             | Pumping rate                                                            |       |      |            |                     |                              |            | Improved                 |                                            |
|                          |                |                      |                               |                                                                                      |                                                                                                |                                                                                                                                                                           |                                                                                                                                                                                                                                                                                          |                               | Autofluorescence                                                                               | TRITC filter (546/600 nm) microscopy and image processing               |       |      |            |                     |                              |            | Improved                 |                                            |
|                          |                |                      |                               |                                                                                      |                                                                                                |                                                                                                                                                                           |                                                                                                                                                                                                                                                                                          |                               | Thermal stress survival                                                                        | Induced with 37°C                                                       |       |      |            |                     |                              |            | Improved                 |                                            |
|                          |                |                      |                               |                                                                                      | n.d.                                                                                           | HPLC-MS <sup>2</sup>                                                                                                                                                      | Several compounds tentatively identified with HPLC-MS <sup>2</sup> (e.g. 2,3,4,5,-tetrahydroxybenzoic acid, zingiberone R1, chlorogenic acid, d-pinoinol-4-O-glucoside, 4-alpha-formyl-stigmast-7,24(241)-dien-3-beta-ol)                                                                | 15 and 30 µg/mL <sup>60</sup> | Lifespan                                                                                       | Mean lifespan                                                           | N2    | L4   | OP50       | Solid agar          | Added to agar and bacteria   | 0.05%      | Improved                 | n.d.                                       |
|                          |                |                      |                               |                                                                                      | Locomotion                                                                                     | Wave initiation rate, activity index, brush stroke and body wave number                                                                                                   | Improved                                                                                                                                                                                                                                                                                 |                               |                                                                                                |                                                                         |       |      |            |                     |                              |            |                          |                                            |
|                          |                |                      |                               |                                                                                      | Thermal stress survival                                                                        | Induced with 37°C                                                                                                                                                         | Improved                                                                                                                                                                                                                                                                                 |                               |                                                                                                |                                                                         |       |      |            |                     |                              |            |                          |                                            |
|                          |                |                      |                               |                                                                                      | ROS stress survival                                                                            | Induced with 60 mM paraquat                                                                                                                                               | Improved                                                                                                                                                                                                                                                                                 |                               |                                                                                                |                                                                         |       |      |            |                     |                              |            |                          |                                            |
|                          |                |                      |                               |                                                                                      | ROS levels                                                                                     | Measurement of fluorescence from YFP-based hydrogen peroxide sensor HyPer under a ribosomal promoter                                                                      | JV1                                                                                                                                                                                                                                                                                      | Improved                      |                                                                                                |                                                                         |       |      |            |                     |                              |            |                          |                                            |
| <i>Ipomoea batatas</i>   | Tuber          | Hydroethanolic (80%) | Crude extract                 | Total antioxidants                                                                   | HPLC-MS                                                                                        | Several compounds tentatively identified with HPLC-MS (cyanidin 3-(p-coumaroyl)-diglucoside-5-glucoside, cyanidin 3-caffeoyl sophoroside and delphinidin 3,5-diglucoside) | 80 µg/mL <sup>162</sup>                                                                                                                                                                                                                                                                  | Lifespan                      | Mean lifespan                                                                                  | N2                                                                      | L4    | OP50 | Solid agar | Spotted onto plates | 0% DMSO                      | Improved   | sir-2.1, skn-1 and sod-3 |                                            |
|                          |                |                      |                               |                                                                                      |                                                                                                |                                                                                                                                                                           |                                                                                                                                                                                                                                                                                          | Autofluorescence              | Filter (340/430 nm); microscopy + image processing                                             |                                                                         |       |      |            |                     |                              | Improved   |                          |                                            |
|                          |                |                      |                               |                                                                                      |                                                                                                |                                                                                                                                                                           |                                                                                                                                                                                                                                                                                          | Thermal stress survival       | Induced with 37°C                                                                              |                                                                         |       |      |            |                     |                              | Improved   |                          |                                            |
|                          |                |                      |                               |                                                                                      |                                                                                                |                                                                                                                                                                           |                                                                                                                                                                                                                                                                                          | ROS stress survival           | Induced with 1% H <sub>2</sub> O <sub>2</sub>                                                  |                                                                         |       |      |            |                     |                              | Improved   |                          |                                            |
|                          |                |                      |                               |                                                                                      |                                                                                                |                                                                                                                                                                           |                                                                                                                                                                                                                                                                                          | ROS levels                    | Measurement of intracellular dichlorofluorescein fluorescence; microscopy and image processing |                                                                         |       |      |            |                     |                              | Improved   |                          |                                            |
|                          |                |                      |                               | Crude extract fermented for 24h with <i>Weissella confusa</i> NJLY1                  | Total antioxidants                                                                             | HPLC-MS                                                                                                                                                                   | Several compounds tentatively identified with HPLC-MS (e.g. chlorogenic acid, peonidin 3,5-diglucoside, peonidin 3-glucoside, feruloyl quinic acids, kaempferol-7-O-glucoside, trans-cinnamic acid, caffeic acid, 1,5-dicaffeoylquinic acid, cyanidin 3-glucoside and 7-hydroxycoumarin) | 80 µg/mL <sup>162</sup>       | Lifespan                                                                                       | Mean lifespan                                                           | N2    | L4   | OP50       | Solid agar          | Spotted onto plates          | 0% DMSO    | Improved                 | daf-16, hsp-16.2, sir-2.1, skn-1 and sod-3 |
|                          |                |                      |                               | Autofluorescence                                                                     | Filter (340/430 nm); microscopy + image processing                                             | Improved                                                                                                                                                                  |                                                                                                                                                                                                                                                                                          |                               |                                                                                                |                                                                         |       |      |            |                     |                              |            |                          |                                            |
|                          |                |                      |                               | Thermal stress survival                                                              | Induced with 37°C                                                                              | Improved                                                                                                                                                                  |                                                                                                                                                                                                                                                                                          |                               |                                                                                                |                                                                         |       |      |            |                     |                              |            |                          |                                            |
|                          |                |                      |                               | ROS stress survival                                                                  | Induced with 1% H <sub>2</sub> O <sub>2</sub>                                                  | Improved                                                                                                                                                                  |                                                                                                                                                                                                                                                                                          |                               |                                                                                                |                                                                         |       |      |            |                     |                              |            |                          |                                            |
|                          |                |                      |                               | ROS levels                                                                           | Measurement of intracellular dichlorofluorescein fluorescence; microscopy and image processing | Improved                                                                                                                                                                  |                                                                                                                                                                                                                                                                                          |                               |                                                                                                |                                                                         |       |      |            |                     |                              |            |                          |                                            |
| <i>Uncaria tomentosa</i> | Rubiaceae      | Bark                 | standardised extract AC-11    |                                                                                      |                                                                                                |                                                                                                                                                                           | 10 µg/mL <sup>99</sup>                                                                                                                                                                                                                                                                   | Proteotoxicity                | YFP tagged α-synuclein                                                                         | NL5901                                                                  | L1    | OP50 | Solid agar | Diluted in          | n.d.                         | Improved   | n.d.                     |                                            |



|                                 |                                          |                            |                                                                                                                                                         |                                   |                                                                                                                                          |                                                                                                                                                                                                   |                                      |                           |                                                                                                                                                                                                     |       |      |            |            |                                                  |           |          |               |
|---------------------------------|------------------------------------------|----------------------------|---------------------------------------------------------------------------------------------------------------------------------------------------------|-----------------------------------|------------------------------------------------------------------------------------------------------------------------------------------|---------------------------------------------------------------------------------------------------------------------------------------------------------------------------------------------------|--------------------------------------|---------------------------|-----------------------------------------------------------------------------------------------------------------------------------------------------------------------------------------------------|-------|------|------------|------------|--------------------------------------------------|-----------|----------|---------------|
|                                 |                                          |                            |                                                                                                                                                         |                                   |                                                                                                                                          |                                                                                                                                                                                                   |                                      |                           | expression in muscles, Microscopy                                                                                                                                                                   |       |      |            |            | OP50 before seeding onto NGM                     |           |          |               |
| <i>Coffea arabica</i>           | Semen (peels)                            | Aqueous                    | Crude extract                                                                                                                                           | Total antioxidants                | n.d.                                                                                                                                     | Caffeine and chlorogenic acid were quantified                                                                                                                                                     | 0.01, 0.1 and 1 mg/mL <sup>25</sup>  | UV stress survival        | Induced with daily UV-C treatment (45 s/day)                                                                                                                                                        | N2    | A    | OP50       | Solid agar | n.d.                                             | 0% DMSO   | Improved | n.d.          |
|                                 | Semen                                    | Aqueous                    | Crude extract                                                                                                                                           | n.d.                              | n.d.                                                                                                                                     | n.d.                                                                                                                                                                                              | 10% <sup>4</sup>                     | Thermal stress survival   | Induced with 33°C                                                                                                                                                                                   | N2    | L1   | OP50       | Solid agar | Diluted in NGM                                   | 0% DMSO   | Improved | hsf-1         |
|                                 |                                          |                            |                                                                                                                                                         |                                   |                                                                                                                                          |                                                                                                                                                                                                   |                                      | Proteotoxicity            | Paralysis assay with constitutive age-dependent YFP::polyglutamine aggregation in muscles<br>YFP tagged polyglutamine in muscles, quantification of fluorescence by microscopy and image processing | AM140 |      |            |            |                                                  | Improved  |          |               |
|                                 | Hydro methanolic (30%, acidified pH=4.5) | Crude extract              | Total hydroxycinnamic acid derivatives, total phenols, total antioxidants                                                                               | NMR, HPLC-MS                      | 18 compounds were tentatively identified by HPLC-MS; caffeine, trigonelline and chlorogenic acid were quantified with <sup>1</sup> H NMR | 0.5, 1 and 1.5 mg/mL <sup>26</sup>                                                                                                                                                                | Lifespan                             | Mean and maximum lifespan | N2                                                                                                                                                                                                  | A     | OP50 | Solid agar | n.d.       | 0% DMSO                                          | Improved  | n.d.     |               |
| ROS stress survival             |                                          |                            |                                                                                                                                                         |                                   |                                                                                                                                          |                                                                                                                                                                                                   | Induced 10 mM paraquat               |                           |                                                                                                                                                                                                     |       |      |            | Improved   |                                                  |           |          |               |
| <i>Gardenia jasminoides</i>     | Fruits                                   | Dichloromethane – methanol | Lead-like enhanced extract: Combined dichloromethane and methanol extracts of degreased (hexane) material, tannin depleted by polyamide SPE             | n.d.                              | HPLC-CAD/HPLC-UV                                                                                                                         | n.d.                                                                                                                                                                                              | 25 and 100 µg/ml <sup>2</sup>        | Lifespan                  | Death Time 50 (DT50)                                                                                                                                                                                | N2    | L4   | OP50       | S medium   | Diluted in liquid                                | 1% DMSO   | Improved | n.d.          |
| <i>Calycophyllum spruceanum</i> | Bark                                     | Aqueous                    | Crude extract                                                                                                                                           | Total phenols, total antioxidants | HPLC-MS <sup>2</sup>                                                                                                                     | 5 compounds tentatively identified with HPLC-MS <sup>2</sup> (gardenoside, 5-hydroxymorin, cyanidin, taxifolin, and 5-hydroxy-6-methoxycoumarin-7-glucoside)                                      | 50, 100 and 200 µg/ml <sup>163</sup> | Lifespan                  | n.d.                                                                                                                                                                                                | BA17  | A    | OP50       | S medium   | Diluted in liquid                                | 0% DMSO   | Improved | daf-16        |
|                                 |                                          |                            |                                                                                                                                                         |                                   |                                                                                                                                          |                                                                                                                                                                                                   |                                      | Pharyngeal pumping        | Pumping rate                                                                                                                                                                                        | N2    |      |            | Solid agar | Supplemented to bacterial lawn                   | Improved  |          |               |
|                                 |                                          |                            |                                                                                                                                                         |                                   |                                                                                                                                          |                                                                                                                                                                                                   |                                      | ROS stress survival       | Induced with 80 µM juglone                                                                                                                                                                          |       | L1   |            | S medium   | Diluted in liquid                                | Improved  |          |               |
|                                 |                                          |                            |                                                                                                                                                         |                                   |                                                                                                                                          |                                                                                                                                                                                                   |                                      | ROS levels                | Measurement of intracellular dichlorofluorescein fluorescence; microscopy and image processing                                                                                                      |       |      |            | Improved   |                                                  |           |          |               |
| <i>Hedyotis diffusa</i>         | Herb                                     | Hydroethanolic (80%)       | Butanol fraction prepared as followed: Crude extract was suspended with distilled water, extracted three times with an equal volume of petroleum ether, | n.d.                              | HPLC-MS                                                                                                                                  | Several compounds tentatively identified with HPLC-MS (e.g. desacetyl asperulosidic acid, asperulosidic acid, quercetin-3-O-sophoroside, quercetin-3-O-sambubioside, E-6-O-p-coumaroyl scandoside | 0.25, 0.5, and 1 mg/mL <sup>68</sup> | Lifespan                  | Mean lifespan                                                                                                                                                                                       | N2    | L1   | OP50       | Solid agar | Poured into petri dishes before OP50 were seeded | 0.2% DMSO | Improved | daf-2, daf-16 |
|                                 |                                          |                            |                                                                                                                                                         |                                   |                                                                                                                                          |                                                                                                                                                                                                   |                                      | Autofluorescence          | Filter (385/420 nm); microscopy + image processing                                                                                                                                                  |       |      |            | Improved   |                                                  |           |          |               |
|                                 |                                          |                            |                                                                                                                                                         |                                   |                                                                                                                                          |                                                                                                                                                                                                   |                                      | Thermal stress survival   | Induced with 37°C                                                                                                                                                                                   |       |      |            | Improved   |                                                  |           |          |               |
|                                 |                                          |                            |                                                                                                                                                         |                                   |                                                                                                                                          |                                                                                                                                                                                                   |                                      | ROS stress survival       | Induced with 40 mM H <sub>2</sub> O <sub>2</sub>                                                                                                                                                    |       |      |            | Improved   |                                                  |           |          |               |

|                                 |       |                      |                      |                                                               |                                                                                                            |                                                                      |                                                                     |                                   |                                                                                                            |                                                                                                            |                 |                                                                                                            |          |                   |                            |                            |                   |                            |             |                                   |                 |                                                                                                            |       |    |      |          |                   |                            |             |
|---------------------------------|-------|----------------------|----------------------|---------------------------------------------------------------|------------------------------------------------------------------------------------------------------------|----------------------------------------------------------------------|---------------------------------------------------------------------|-----------------------------------|------------------------------------------------------------------------------------------------------------|------------------------------------------------------------------------------------------------------------|-----------------|------------------------------------------------------------------------------------------------------------|----------|-------------------|----------------------------|----------------------------|-------------------|----------------------------|-------------|-----------------------------------|-----------------|------------------------------------------------------------------------------------------------------------|-------|----|------|----------|-------------------|----------------------------|-------------|
|                                 |       |                      |                      |                                                               |                                                                                                            |                                                                      |                                                                     |                                   | Proteintoxicity                                                                                            | Paralysis assay with temperature-dependent amyloid beta expression in muscles                              | CL4176          |                                                                                                            |          |                   |                            | n.d.                       |                   | Improved                   |             |                                   |                 |                                                                                                            |       |    |      |          |                   |                            |             |
| <i>Damnacanthus officinarum</i> | Roots | Hydroethanolic (95%) | Crude extract        | n.d.                                                          | n.d.                                                                                                       | n.d.                                                                 | 800 and 1200 µg/ml <sup>164</sup>                                   | Lifespan                          | Mean and median lifespan                                                                                   | HA759                                                                                                      | A               | OP50                                                                                                       | S medium | Diluted in liquid | n.d. concentration of DMSO | Improved                   |                   |                            |             |                                   |                 |                                                                                                            |       |    |      |          |                   |                            |             |
|                                 |       |                      |                      |                                                               |                                                                                                            |                                                                      |                                                                     | Proteintoxicity                   | YFP tagged polyglutamine in ASH neurons; quantification of fluorescence by microscopy and image processing |                                                                                                            | L1              |                                                                                                            |          |                   |                            |                            |                   |                            |             | Improved                          |                 |                                                                                                            |       |    |      |          |                   |                            |             |
|                                 |       |                      |                      |                                                               |                                                                                                            |                                                                      |                                                                     | Proteintoxicity                   | YFP tagged polyglutamine in ASH neurons; quantification of fluorescence by microscopy and image processing |                                                                                                            | L1              |                                                                                                            |          |                   |                            |                            |                   |                            |             | Detrimental                       |                 |                                                                                                            |       |    |      |          |                   |                            |             |
|                                 |       |                      |                      |                                                               |                                                                                                            | Petrolether fraction obtained by sequential liquid-liquid partition  | n.d.                                                                | n.d.                              | n.d.                                                                                                       | 800 and 1200 µg/ml <sup>164</sup>                                                                          | Proteintoxicity | YFP tagged polyglutamine in ASH neurons; quantification of fluorescence by microscopy and image processing | HA759    | L1                | OP50                       | S medium                   | Diluted in liquid | n.d. concentration of DMSO | Detrimental |                                   |                 |                                                                                                            |       |    |      |          |                   |                            |             |
|                                 |       |                      |                      |                                                               |                                                                                                            | Acetoacetate fraction obtained by sequential liquid-liquid partition | n.d.                                                                | n.d.                              | n.d.                                                                                                       | 800 and 1200 µg/ml <sup>164</sup>                                                                          | Proteintoxicity | YFP tagged polyglutamine in ASH neurons; quantification of fluorescence by microscopy and image processing | HA759    | L1                | OP50                       | S medium                   | Diluted in liquid | n.d. concentration of DMSO | Improved    |                                   |                 |                                                                                                            |       |    |      |          |                   |                            |             |
|                                 |       |                      |                      |                                                               |                                                                                                            | Butanol fraction obtained by sequential liquid-liquid partition      | n.d.                                                                | n.d.                              | n.d.                                                                                                       | 800 and 1200 µg/ml <sup>164</sup>                                                                          | Lifespan        | Mean and median lifespan                                                                                   | HA759    | A                 | OP50                       | S medium                   | Diluted in liquid | n.d. concentration of DMSO | Improved    |                                   |                 |                                                                                                            |       |    |      |          |                   |                            |             |
|                                 |       |                      |                      | Proteintoxicity                                               | YFP tagged polyglutamine in ASH neurons; quantification of fluorescence by microscopy and image processing | L1                                                                   | Improved                                                            |                                   |                                                                                                            |                                                                                                            |                 |                                                                                                            |          |                   |                            |                            |                   |                            |             |                                   |                 |                                                                                                            |       |    |      |          |                   |                            |             |
|                                 |       |                      |                      | Water fraction obtained by sequential liquid-liquid partition | n.d.                                                                                                       | n.d.                                                                 | n.d.                                                                | 800 and 1200 µg/ml <sup>164</sup> | Lifespan                                                                                                   | Mean and median lifespan                                                                                   | HA759           | A                                                                                                          | OP50     | S medium          | Diluted in liquid          | n.d. concentration of DMSO | Improved          |                            |             |                                   |                 |                                                                                                            |       |    |      |          |                   |                            |             |
|                                 |       |                      |                      | Proteintoxicity                                               | YFP tagged polyglutamine in ASH neurons; quantification of fluorescence by microscopy and image processing | L1                                                                   | Improved                                                            |                                   |                                                                                                            |                                                                                                            |                 |                                                                                                            |          |                   |                            |                            |                   |                            |             |                                   |                 |                                                                                                            |       |    |      |          |                   |                            |             |
|                                 |       | Leaves               | Hydroethanolic (95%) | Crude extract                                                 | n.d.                                                                                                       | n.d.                                                                 | n.d.                                                                | 800 and 1200 µg/ml <sup>164</sup> | Proteintoxicity                                                                                            | YFP tagged polyglutamine in ASH neurons; quantification of fluorescence by microscopy and image processing | HA759           | L1                                                                                                         | OP50     | S medium          | Diluted in liquid          | n.d. concentration of DMSO | Detrimental       |                            |             |                                   |                 |                                                                                                            |       |    |      |          |                   |                            |             |
|                                 |       |                      |                      |                                                               |                                                                                                            |                                                                      | Petrolether fraction obtained by sequential liquid-liquid partition |                                   | n.d.                                                                                                       | n.d.                                                                                                       |                 | n.d.                                                                                                       |          |                   |                            |                            |                   |                            |             | 800 and 1200 µg/ml <sup>164</sup> | Proteintoxicity | YFP tagged polyglutamine in ASH neurons; quantification of fluorescence by microscopy and image processing | HA759 | L1 | OP50 | S medium | Diluted in liquid | n.d. concentration of DMSO | Detrimental |
|                                 |       |                      |                      |                                                               |                                                                                                            |                                                                      | Acetoacetate fraction obtained by sequential liquid-                |                                   | n.d.                                                                                                       | n.d.                                                                                                       |                 | n.d.                                                                                                       |          |                   |                            |                            |                   |                            |             | 800 and 1200 µg/ml <sup>164</sup> | Proteintoxicity | YFP tagged polyglutamine in ASH neurons;                                                                   | HA759 | L1 | OP50 | S medium | Diluted in liquid | n.d. concentration         | Detrimental |

|                                  |             |          |                            |                                                                                                                                             |                                 |                      |                                                                                                                                                                                                                                      |                                   |                             |                                                                                                            |                                             |      |            |            |                   |                            |           |          |
|----------------------------------|-------------|----------|----------------------------|---------------------------------------------------------------------------------------------------------------------------------------------|---------------------------------|----------------------|--------------------------------------------------------------------------------------------------------------------------------------------------------------------------------------------------------------------------------------|-----------------------------------|-----------------------------|------------------------------------------------------------------------------------------------------------|---------------------------------------------|------|------------|------------|-------------------|----------------------------|-----------|----------|
|                                  |             |          |                            | liquid partition                                                                                                                            |                                 |                      |                                                                                                                                                                                                                                      |                                   |                             | quantification of fluorescence by microscopy and image processing                                          |                                             |      |            |            |                   | of DMSO                    |           |          |
|                                  |             |          |                            | Butanol fraction obtained by sequential liquid-liquid partition                                                                             | n.d.                            | n.d.                 | n.d.                                                                                                                                                                                                                                 | 800 and 1200 µg/ml <sup>164</sup> | Lifespan                    | Mean and median lifespan                                                                                   | HA759                                       | A    | OP50       | S medium   | Diluted in liquid | n.d. concentration of DMSO | Improved  |          |
|                                  |             |          |                            |                                                                                                                                             |                                 |                      |                                                                                                                                                                                                                                      |                                   | Proteotoxicity              | YFP tagged polyglutamine in ASH neurons; quantification of fluorescence by microscopy and image processing | HA759                                       | L1   | OP50       | S medium   | Diluted in liquid | n.d. concentration of DMSO | Improved  |          |
|                                  |             |          |                            | Water fraction obtained by sequential liquid-liquid partition                                                                               | n.d.                            | n.d.                 | n.d.                                                                                                                                                                                                                                 | 800 and 1200 µg/ml <sup>164</sup> | Proteotoxicity              | YFP tagged polyglutamine in ASH neurons; quantification of fluorescence by microscopy and image processing | HA759                                       | L1   | OP50       | S medium   | Diluted in liquid | n.d. concentration of DMSO | Improved  |          |
| <i>Cynanchum stauntonii</i>      | Apocynaceae | Rhizomes | dichloromethane – methanol | Lead-like enhanced extract: Combined dichloromethane and methanol extracts of degreased (hexane) material, tannin depleted by polyamide SPE | n.d.                            | n.d.                 | n.d.                                                                                                                                                                                                                                 | 25 and 100 µg/ml <sup>2</sup>     | Lifespan                    | Death Time 50 (DT50)                                                                                       | N2                                          | L4   | OP50       | S medium   | Diluted in liquid | 1% DMSO                    | Improved  | n.d.     |
| <i>Cynanchum paniculatum</i>     |             | Roots    | dichloromethane – methanol | Lead-like enhanced extract: Combined dichloromethane and methanol extracts of degreased (hexane) material, tannin depleted by polyamide SPE | n.d.                            | n.d.                 | n.d.                                                                                                                                                                                                                                 | 25 and 100 µg/ml <sup>2</sup>     | Lifespan                    | Death Time 50 (DT50)                                                                                       | N2                                          | L4   | OP50       | S medium   | Diluted in liquid | 1% DMSO                    | Improved  | n.d.     |
| <i>Andrographis paniculata</i>   | Acanthaceae | Herb     | dichloromethane – methanol | Lead-like enhanced extract: Combined dichloromethane and methanol extracts of degreased (hexane) material, tannin depleted by polyamide SPE | n.d.                            | n.d.                 | n.d.                                                                                                                                                                                                                                 | 25 and 100 µg/ml <sup>2</sup>     | Lifespan                    | Death Time 50 (DT50)                                                                                       | N2                                          | L4   | OP50       | S medium   | Diluted in liquid | 1% DMSO                    | No effect | n.d.     |
| <i>Phlogacanthus thysiflorus</i> |             | Leaves   | Aqueous                    | Crude extract                                                                                                                               | Total phenols, total flavonoids | n.d.                 | n.d.                                                                                                                                                                                                                                 | n.d.                              | 1 mg/ml <sup>165</sup>      | ROS stress survival                                                                                        | Induced with 10 mm tert-butyl hydroperoxide | N2   | L3         | OP50       | S medium          | Diluted in liquid          | n.d.      | Improved |
|                                  |             |          | Methanol                   | Crude extract                                                                                                                               | Total phenols, total flavonoids | GC-MS                | Several compounds tentatively identified by MS <sup>2</sup>                                                                                                                                                                          | 1 mg/ml <sup>165</sup>            | ROS stress survival         | Induced with 10 mm tert-butyl hydroperoxide                                                                | N2                                          | L3   | OP50       | S medium   | Diluted in liquid | n.d.                       | Improved  | sod      |
| <i>Scutellaria barbata</i>       | Lamiaceae   | Herb     | dichloromethane – methanol | Lead-like enhanced extract: Combined dichloromethane and methanol extracts of degreased (hexane) material, tannin depleted by polyamide SPE | n.d.                            | n.d.                 | n.d.                                                                                                                                                                                                                                 | 25 and 100 µg/mL <sup>2</sup>     | Lifespan                    | Death Time 50 (DT50)                                                                                       | N2                                          | L4   | OP50       | S medium   | Diluted in liquid | 1% DMSO                    | No effect | n.d.     |
| <i>Salvia rosmarinus</i>         |             | Flowers  | Ethanol                    | Crude Soxhlet extract                                                                                                                       | Total phenols                   | HPLC-MS <sup>2</sup> | 14 compounds identified and quantified using HPLC-MS <sup>2</sup> and reference compounds (cis 4-O-caffeoylquinic acid, trans 4-O-caffeoylquinic acid, medioresinol, caffeic acid, luteolin-O-di-hexoside, luteolin-7-O-glucuronide, | 50–500 µg/mL <sup>166</sup>       | Lifespan                    | Median lifespan                                                                                            | SS104                                       | A    | OP50       | Solid agar | n.d.              | n.d.                       | No effect | Improved |
|                                  |             |          |                            |                                                                                                                                             |                                 |                      |                                                                                                                                                                                                                                      | ROS stress survival               | Induced with 150 µM juglone | N2                                                                                                         | L1                                          | OP50 | Solid agar | n.d.       | n.d.              |                            |           |          |

|                           |          |                   |                               |                                                                                      |                                                                       |         |                                                                                                                                                                                                                            |                               |                                                                                                                          |                                                                                                                                                                                                                                                                                                                                                                    |                          |          |                     |                             |                                                                  |                    |                                              |        |
|---------------------------|----------|-------------------|-------------------------------|--------------------------------------------------------------------------------------|-----------------------------------------------------------------------|---------|----------------------------------------------------------------------------------------------------------------------------------------------------------------------------------------------------------------------------|-------------------------------|--------------------------------------------------------------------------------------------------------------------------|--------------------------------------------------------------------------------------------------------------------------------------------------------------------------------------------------------------------------------------------------------------------------------------------------------------------------------------------------------------------|--------------------------|----------|---------------------|-----------------------------|------------------------------------------------------------------|--------------------|----------------------------------------------|--------|
|                           |          |                   |                               |                                                                                      |                                                                       |         | quercetin-3-O-glucoside, isorhamnetin-3-O-rutinoside, isorhamnetin-3-O-glucoside cis rosmarinic acid, trans rosmarinic acid, luteolin-O-glucuronide, luteolin-3'-acetyl-O-glucuronide, luteolin-3'-acetyl-O-glucuronide D) |                               |                                                                                                                          |                                                                                                                                                                                                                                                                                                                                                                    |                          |          |                     |                             |                                                                  |                    |                                              |        |
| <i>Sideritis scardica</i> |          | Herb              | Aqueous                       | Crude extract                                                                        | n.d.                                                                  | n.d.    | n.d.                                                                                                                                                                                                                       | 5 and 50 µg/mL <sup>167</sup> | Lifespan<br>Thermal stress survival<br>Nuclear translocation                                                             | Mean lifespan<br>Induced with 35°C<br>DAF-16::GFP translocation upon heat shock                                                                                                                                                                                                                                                                                    | N2<br>TJ356              | L4<br>L1 | OP50                | Peptone free solid NGM agar | n.d.                                                             | 0% DMSO            | Improved<br>Improved<br>Detrimental          | n.d.   |
| <i>Ligustrum lucidum</i>  | Oleaceae | Fruits            | Butyl-methyl ether – methanol | Combined crude extracts of (1) butyl-methyl ether (MTBE) - methanol and (2) methanol | n.d.                                                                  | HPLC-MS | n.d.                                                                                                                                                                                                                       | 30 µg/ml <sup>49</sup>        | Thermal stress survival                                                                                                  | Induced with 37 °C                                                                                                                                                                                                                                                                                                                                                 | N2                       | L4       | OP50                | Solid NGM agar              | added to the NGM agar plates                                     | 0.05% DMSO         | Improved                                     | n.d.   |
| <i>Olea europaea</i>      |          | Fruits (pulp)     | Aqueous                       | Acquirable special extract titrated to 12% polyphenolic                              | total phenolic content                                                | n.d.    | some ingredients were quantified (method n.d.) (hydroxytyrosol, oleuropein, tyrosol oleuropein aglycone and gallic acid)                                                                                                   | 250 ug/ml <sup>168</sup>      | Lifespan elongation<br>Locomotion<br>Thermal stress survival<br>Autofluorescence<br>Proteintoxicity<br>Neurodegeneration | Mean, median and maximum lifespan<br>Wave initiation rate, activity index, brush stroke and body wave number<br>Induced with 37 °C<br>Filter (545/610 nm) Microscopy + Image Processing<br>YFP tagged α-synuclein expression in muscles, Microscopy & image processing<br>6-OHDA induced neurodegeneration monitored by GFP tagged dopamine transporter expression | N2<br>N2<br>OW13<br>UA44 | L4<br>L4 | OP50<br>OP50        | Solid agar<br>Solid agar    | added to the bacteria and agar<br>added to the bacteria and agar | 0% DMSO<br>0% DMSO | Improved<br>Improved<br>Improved<br>Improved |        |
|                           |          | leaves            | methanol                      | Crude extract                                                                        | Total phenolic, total flavonoid, total protein, total sugars reported | n.d.    | n.d.                                                                                                                                                                                                                       | 0.4 mg/ml <sup>169</sup>      | ROS levels<br>Thermal stress survival<br>Nuclear translocation                                                           | Measurement of intracellular dichlorofluorescein fluorescence Plate reader<br>Induced with 37 °C<br>DAF-16::GFP                                                                                                                                                                                                                                                    | N2<br>TJ356              | L4<br>L1 | OP50                | Solid agar                  | Diluted in agar                                                  | 1% DMSO            | Improved<br>Improved<br>Improved             | daf-16 |
| <i>Jasminum sambac</i>    |          | Flowers           | Hydroethanolic (80%)          | Crude extract                                                                        | Total antioxidants                                                    | n.d.    | n.d.                                                                                                                                                                                                                       | 50 mg/mL <sup>24</sup>        | Lifespan                                                                                                                 | Mean and Median Lifespan                                                                                                                                                                                                                                                                                                                                           | N2                       | L4       | UV inactivated OP50 | Solid NGM agar              | Added onto the surfaces of the NGM                               | n.d.               | Detrimental                                  | n.d.   |
| <i>Osmanthus fragrans</i> |          | Flowers (corolla) | Hydroethanolic (80%)          | Crude extract                                                                        | Total antioxidants                                                    | n.d.    | n.d.                                                                                                                                                                                                                       | 50 mg/mL <sup>24</sup>        | Lifespan                                                                                                                 | Mean and Median Lifespan                                                                                                                                                                                                                                                                                                                                           | N2                       | L4       | UV inactivated OP50 | Solid NGM agar              | Added onto the surface                                           | n.d.               | No effect                                    | n.d.   |

|                              |               |             |                                                                                             |                                                                                                                                             |                                   |                                                                                                                                                                                          |                                  |                               |                                                                               |                             |          |                     |            |                   |                   |           |          |          |
|------------------------------|---------------|-------------|---------------------------------------------------------------------------------------------|---------------------------------------------------------------------------------------------------------------------------------------------|-----------------------------------|------------------------------------------------------------------------------------------------------------------------------------------------------------------------------------------|----------------------------------|-------------------------------|-------------------------------------------------------------------------------|-----------------------------|----------|---------------------|------------|-------------------|-------------------|-----------|----------|----------|
| <i>Euphrasia officinalis</i> | Orobanchaceae | Herb        | dichloromethane – methanol                                                                  | Lead-like enhanced extract: Combined dichloromethane and methanol extracts of degreased (hexane) material, tannin depleted by polyamide SPE | n.d.                              | n.d.                                                                                                                                                                                     | n.d.                             | 25 and 100 µg/ml <sup>2</sup> | Lifespan                                                                      | Death Time 50 (DT50)        | N2       | L4                  | OP50       | S medium          | Diluted in liquid | 1% DMSO   | Improved | n.d.     |
| <i>Camellia tenuifolia</i>   | Theaceae      | Seed pomace | Aqueous                                                                                     | Crude extract                                                                                                                               | n.d.                              | n.d.                                                                                                                                                                                     | n.d.                             | 1 and 10 µg/mL <sup>65</sup>  | ROS stress survival                                                           | Induced with 250 µM juglone | N2       | L1                  | OP50       | S Medium          | Diluted in liquid | n.d.      | Improved |          |
|                              |               |             | Ethanol                                                                                     | Crude extract                                                                                                                               | n.d.                              | n.d.                                                                                                                                                                                     | n.d.                             | 1 and 10 µg/mL <sup>65</sup>  | ROS stress survival                                                           | Induced with 250 µM juglone | N2       | L1                  | OP50       | S Medium          | Diluted in liquid | n.d.      | Improved |          |
|                              |               |             | Methanol                                                                                    | Crude extract                                                                                                                               | Total phenols, total antioxidants | HPLC, NMR, MS                                                                                                                                                                            | Bioactivity-guided fractionation | 1 and 10 µg/mL <sup>65</sup>  | ROS stress survival                                                           | Induced with 250 µM juglone | N2       | L1                  | OP50       | S Medium          | Diluted in liquid | n.d.      | Improved |          |
|                              |               |             |                                                                                             | Fraction 1 of crude methanolic extract obtained by Diaion HP-20 LC with water/MeOH gradient                                                 | Total phenols, total antioxidants | n.d.                                                                                                                                                                                     | n.d.                             | 1 and 10 µg/mL <sup>65</sup>  | ROS stress survival                                                           | Induced with 250 µM juglone | N2       | L1                  | OP50       | S Medium          | Diluted in liquid | n.d.      | Improved |          |
|                              |               |             | Fraction 2 of crude methanolic extract obtained by Diaion HP-20 LC with water/MeOH gradient | Total phenols, total antioxidants                                                                                                           | n.d.                              | n.d.                                                                                                                                                                                     | 1 and 10 µg/mL <sup>65</sup>     | ROS stress survival           | Induced with 250 µM juglone                                                   | N2                          | L1       | OP50                | S Medium   | Diluted in liquid | n.d.              | No effect |          |          |
|                              |               |             | Fraction 3 of crude methanolic extract obtained by Diaion HP-20 LC with water/MeOH gradient | Total phenols, total antioxidants                                                                                                           | HPLC, NMR, MS                     | Bioactivity-guided fractionation led to the isolation of kaempferol 3-O-(2"-glucopyranosyl)-rutinoside and kaempferol 3-O-(2"-xylopyranosyl)-rutinoside characterised by HPLC-MS and NMR | 1 and 10 µg/mL <sup>65</sup>     | Lifespan                      | Median lifespan                                                               | N2                          | L1       | UV-inactivated OP50 | Solid agar | n.d.              | n.d.              | Improved  |          |          |
|                              |               |             |                                                                                             |                                                                                                                                             |                                   |                                                                                                                                                                                          |                                  | ROS stress survival           | Induced with 250 µM juglone                                                   |                             |          | OP50                | S Medium   | Diluted in liquid | n.d.              | Improved  |          |          |
|                              |               |             |                                                                                             |                                                                                                                                             |                                   |                                                                                                                                                                                          |                                  | ROS levels                    | Measurement of intracellular dichlorofluorescein fluorescence                 |                             |          |                     | OP50       | Solid agar        | n.d.              | n.d.      | Improved |          |
|                              |               |             |                                                                                             |                                                                                                                                             |                                   |                                                                                                                                                                                          |                                  | Proteotoxicity                | Paralysis assay with temperature-dependent amyloid beta expression in muscles |                             |          | CL4176              |            | OP50              | Solid agar        | n.d.      | n.d.     | Improved |
|                              |               |             | Fraction 4 of crude methanolic extract obtained by Diaion HP-20 LC with water/MeOH gradient | Total phenols, total antioxidants                                                                                                           | n.d.                              | n.d.                                                                                                                                                                                     | 1 and 10 µg/mL <sup>65</sup>     | ROS stress survival           | Induced with 250 µM juglone                                                   | N2                          | L1       | OP50                | S Medium   | Diluted in liquid | n.d.              | No effect |          |          |
|                              |               |             | Fraction 5 of crude methanolic extract obtained by Diaion HP-20 LC with water/MeOH gradient | Total phenols, total antioxidants                                                                                                           | n.d.                              | n.d.                                                                                                                                                                                     | 1 and 10 µg/mL <sup>65</sup>     | ROS stress survival           | Induced with 250 µM juglone                                                   | N2                          | L1       | OP50                | S Medium   | Diluted in liquid | n.d.              | No effect |          |          |
|                              |               |             | Fraction 6 of crude methanolic extract obtained by Diaion HP-20 LC with water/MeOH gradient | Total phenols, total antioxidants                                                                                                           | n.d.                              | n.d.                                                                                                                                                                                     | 1 and 10 µg/mL <sup>65</sup>     | ROS stress survival           | Induced with 250 µM juglone                                                   | N2                          | L1       | OP50                | S Medium   | Diluted in liquid | n.d.              | No effect |          |          |
| Ethylacetate                 | Crude extract | n.d.        | n.d.                                                                                        | n.d.                                                                                                                                        | 1 and 10 µg/mL <sup>65</sup>      | ROS stress survival                                                                                                                                                                      | Induced with 250 µM juglone      | N2                            | L1                                                                            | OP50                        | S Medium | Diluted in liquid   | n.d.       | No effect         |                   |           |          |          |
| Hexane                       | Crude extract | n.d.        | n.d.                                                                                        | n.d.                                                                                                                                        | 1 and 10 µg/mL <sup>65</sup>      | ROS stress survival                                                                                                                                                                      | Induced with 250 µM juglone      | N2                            | L1                                                                            | OP50                        | S Medium | Diluted in liquid   | n.d.       | No effect         |                   |           |          |          |

|                          |                                                    |                           |                                        |                                                                                                                                                                                                                                                |                                      |                                      |                                                         |                                                     |                                                                               |                     |                     |                     |                 |                           |           |           |                |
|--------------------------|----------------------------------------------------|---------------------------|----------------------------------------|------------------------------------------------------------------------------------------------------------------------------------------------------------------------------------------------------------------------------------------------|--------------------------------------|--------------------------------------|---------------------------------------------------------|-----------------------------------------------------|-------------------------------------------------------------------------------|---------------------|---------------------|---------------------|-----------------|---------------------------|-----------|-----------|----------------|
| <i>Camellia sinensis</i> | Leaves                                             | Hexane                    | Crude extract                          | n.d.                                                                                                                                                                                                                                           | n.d.                                 | n.d.                                 | 10 and 100 µg/mL <sup>43</sup>                          | Lifespan                                            | Mean and maximum lifespan                                                     | CL4176              | L1                  | OP50                | Solid agar      | liquid<br>Diluted in OP50 | 0.1% DMSO | No effect | n.d.           |
|                          |                                                    |                           |                                        |                                                                                                                                                                                                                                                |                                      |                                      |                                                         | Proteotoxicity                                      | Paralysis assay with temperature-dependent amyloid beta expression in muscles |                     |                     |                     |                 |                           |           | Improved  |                |
|                          |                                                    |                           | Volatile fraction of crude extract     | n.d.                                                                                                                                                                                                                                           | n.d.                                 | n.d.                                 | 2 µg/mL <sup>43</sup>                                   | Lifespan                                            | Mean and maximum lifespan                                                     | CL4176              | L1                  | OP50                | Solid agar      | Diluted in OP50           | 0.1% DMSO | No effect | n.d.           |
|                          |                                                    |                           |                                        |                                                                                                                                                                                                                                                |                                      |                                      |                                                         | Proteotoxicity                                      | Paralysis assay with temperature-dependent amyloid beta expression in muscles |                     |                     |                     |                 |                           |           | No effect |                |
|                          |                                                    |                           | Non-volatile fraction of crude extract | n.d.                                                                                                                                                                                                                                           | n.d.                                 | n.d.                                 | 10 and 100 µg/mL <sup>43</sup>                          | Lifespan                                            | Mean and maximum lifespan                                                     | CL4176              | L1                  | OP50                | Solid agar      | Diluted in OP50           | 0.1% DMSO | Improved  | n.d.           |
|                          |                                                    |                           |                                        |                                                                                                                                                                                                                                                |                                      |                                      |                                                         | Proteotoxicity                                      | Paralysis assay with temperature-dependent amyloid beta expression in muscles |                     |                     |                     |                 |                           |           | Improved  |                |
|                          |                                                    | Aqueous                   | Crude extract (black tea)              | n.d.                                                                                                                                                                                                                                           | n.d.                                 | n.d.                                 | 50, 100 and 200 mg/ml <sup>170</sup>                    | Lifespan                                            |                                                                               | N2                  | A                   | UV-inactivated OP50 | Solid agar      | Diluted in OP50           | 0% DMSO   | No effect | sir-2.1, sek-1 |
|                          |                                                    |                           |                                        |                                                                                                                                                                                                                                                |                                      |                                      |                                                         | Thermal stress survival                             | Induced with 35 °C                                                            |                     |                     |                     |                 |                           |           | Improved  |                |
|                          |                                                    |                           |                                        |                                                                                                                                                                                                                                                |                                      |                                      |                                                         | UV stress survival                                  | Induced with UV 2000 J/m <sup>2</sup>                                         |                     |                     |                     |                 |                           |           | Improved  |                |
|                          |                                                    |                           |                                        |                                                                                                                                                                                                                                                |                                      |                                      |                                                         | Hypertonic stress survival                          | Induced with 500 mM NaCl                                                      |                     |                     |                     |                 |                           |           | Improved  |                |
|                          |                                                    |                           |                                        |                                                                                                                                                                                                                                                |                                      |                                      |                                                         | ROS levels                                          | Measurement of intracellular dichlorofluorescein fluorescence                 |                     |                     |                     |                 |                           |           | Improved  |                |
|                          |                                                    | Crude extract (black tea) | n.d.                                   | n.d.                                                                                                                                                                                                                                           | n.d.                                 | 50, 100 and 200 mg/ml <sup>171</sup> | Hypertonic stress survival                              | Induced with 500 mM NaCl                            | N2<br>AM140<br>N2                                                             | L4                  | UV-inactivated OP50 | Solid agar          | Diluted in OP50 | 0% DMSO                   | Improved  | sek-1     |                |
|                          |                                                    |                           |                                        |                                                                                                                                                                                                                                                |                                      |                                      |                                                         | Induced with 500 mM Na <sub>2</sub> SO <sub>4</sub> |                                                                               |                     |                     |                     |                 |                           | Improved  |           |                |
| Induced with 500 mM LiCl | Improved                                           |                           |                                        |                                                                                                                                                                                                                                                |                                      |                                      |                                                         |                                                     |                                                                               |                     |                     |                     |                 |                           |           |           |                |
| Induced with 500 mM KCl  | Improved                                           |                           |                                        |                                                                                                                                                                                                                                                |                                      |                                      |                                                         |                                                     |                                                                               |                     |                     |                     |                 |                           |           |           |                |
| Aqueous                  | Crude extract (green tea)                          | n.d.                      | n.d.                                   | n.d.                                                                                                                                                                                                                                           | 50, 100 and 200 mg/ml <sup>171</sup> | Hypertonic stress survival           | Induced with 500 mM NaCl                                | N2                                                  | L4                                                                            | UV-inactivated OP50 | Solid agar          | Diluted in OP50     | 0% DMSO         | No effect                 | n.d.      |           |                |
| Aqueous                  | Crude extract (green tea)                          | Total antioxidants        | HPLC-MS                                | Several constituents tentatively identified by LC-MS (catechin, epicatechin, epicatechin gallate, gallic acid, epigallocatechin and epigallocatechin gallate)                                                                                  | 100 µg/mL <sup>172</sup>             | ROS stress survival                  | Induced with 80 µM juglone                              | N2                                                  | L1                                                                            | OP50                | liquid 5-medium     | Diluted in liquid   | 0% DMSO         | Improved                  | n.d.      |           |                |
| n.d.                     | Acquirable special extract enriched with catechins | n.d.                      | n.d.                                   | Several constituents quantified using RP-HPLC-UV (Epigallocatechin, catechin, epicatechin, epigallocatechin gallate, epicatechin gallate, gallic acid, gallo catechin, gallo catechin gallate, caffeine, theobromine, theogallin, gallic acid) | 0.01% <sup>31</sup>                  | Thermal/osmotic stress survival      | Induced with 37 °C and 10 mM glucose                    | N2                                                  | A                                                                             | OP50                | M9 with 1% Tween 20 | Diluted in liquid   | 0% DMSO         | Improved                  | sir-2.1   |           |                |
| Aqueous                  | Crude extract (oolong tea)                         | n.d.                      | HPLC-UV                                | Several constituents were tentatively identified by HPLC-UV and comparison to reference compounds                                                                                                                                              | 0, 50, 100, 200 µg/ml <sup>173</sup> | Proteotoxicity                       | Paralysis assay with temperature-dependent amyloid beta | CL4176                                              | L1                                                                            | OP50                | S medium            | Diluted in liquid   | 0% DMSO         | Improved                  | n.d.      |           |                |

|                                      |                                                                                              |         |                      |               |                    |                                                                                           |                                                                                                                           |                                  |                                                                       |                                                                                                     |         |                                                                                           |                                      |                   |                                           |          |               |                     |            |                                               |            |                                                |                       |
|--------------------------------------|----------------------------------------------------------------------------------------------|---------|----------------------|---------------|--------------------|-------------------------------------------------------------------------------------------|---------------------------------------------------------------------------------------------------------------------------|----------------------------------|-----------------------------------------------------------------------|-----------------------------------------------------------------------------------------------------|---------|-------------------------------------------------------------------------------------------|--------------------------------------|-------------------|-------------------------------------------|----------|---------------|---------------------|------------|-----------------------------------------------|------------|------------------------------------------------|-----------------------|
|                                      |                                                                                              |         |                      |               |                    |                                                                                           | (gallic acid, different catechins, and caffeine)                                                                          |                                  |                                                                       | expression in muscles                                                                               |         |                                                                                           |                                      |                   |                                           |          |               |                     |            |                                               |            |                                                |                       |
|                                      |                                                                                              | Flowers | Hydroethanolic (80%) | Crude extract | Total antioxidants | n.d.                                                                                      | n.d.                                                                                                                      | 50 mg/mL <sup>24</sup>           | Lifespan                                                              | Mean and Median Lifespan                                                                            | N2      | L4                                                                                        | UV inactivated OP50                  | Solid agar        | Added onto the surfaces of the NGM        | n.d.     | Detrimental   | n.d.                |            |                                               |            |                                                |                       |
| <i>Panax notoginseng</i>             | Araliaceae                                                                                   | Roots   | Ethanol              | Crude extract | n.d.               | HPLC-UV                                                                                   | Notoginsenoside R1, ginsenoside Rg1, and ginsenoside Rb1 were tentatively identified with HPLC-UV and reference compounds | 0.8 and 1.6 mg/mL <sup>174</sup> | Lifespan                                                              | Mean lifespan                                                                                       | N2      | A                                                                                         | OP50                                 | Solid agar        | n.d.                                      | n.d.     | Improved      | daf-2 and daf-16    |            |                                               |            |                                                |                       |
|                                      |                                                                                              |         |                      |               |                    |                                                                                           |                                                                                                                           |                                  | Autofluorescence                                                      | Filter (385/420 nm); microscopy and image processing                                                |         |                                                                                           |                                      |                   |                                           |          |               |                     |            |                                               |            |                                                |                       |
|                                      |                                                                                              |         |                      |               |                    |                                                                                           |                                                                                                                           |                                  | Thermal stress survival                                               | Induced with 35°C                                                                                   |         |                                                                                           |                                      |                   |                                           |          |               |                     |            |                                               |            |                                                |                       |
|                                      |                                                                                              |         |                      |               |                    |                                                                                           |                                                                                                                           |                                  | ROS stress survival                                                   | Induced with 1.4 mM H <sub>2</sub> O <sub>2</sub>                                                   |         |                                                                                           |                                      |                   |                                           |          |               |                     |            |                                               |            |                                                |                       |
|                                      |                                                                                              |         |                      |               |                    |                                                                                           |                                                                                                                           |                                  | Antioxidant capacity                                                  | Measurement of dichlorofluorescein fluorescence after incubation with H <sub>2</sub> O <sub>2</sub> |         |                                                                                           |                                      |                   |                                           |          |               |                     |            |                                               |            |                                                |                       |
| <i>Panax ginseng</i>                 |                                                                                              | n.d.    | n.d.                 | n.d.          | HPLC-MS            | Several ginsenosides were identified and quantified using HPLC-MS and reference compounds | 85 µg/mL <sup>175</sup>                                                                                                   | Thermal stress survival          | Induced with 37°C                                                     | N2                                                                                                  | A       | Carbenicillin inactivated HT115                                                           | Liquid NGM                           | Diluted in liquid | 0% DMSO                                   | Improved | daf-16        |                     |            |                                               |            |                                                |                       |
|                                      |                                                                                              |         |                      |               |                    |                                                                                           |                                                                                                                           | Nuclear translocation            | DAF-16::GFP                                                           |                                                                                                     |         |                                                                                           |                                      |                   |                                           |          |               | TJ356               |            |                                               |            |                                                |                       |
|                                      |                                                                                              |         |                      |               |                    |                                                                                           |                                                                                                                           | Aqueous                          | Ginsenoside enriched fraction prepared by several rounds of SPE       | n.d.                                                                                                | HPLC-UV | Several ginsenosides were identified and quantified using HPLC-UV and reference compounds | 0.1, 0.2 and 0.4 mg/ml <sup>96</sup> | Lifespan          | n.d.                                      | N2       | L1<br>L4<br>A | UV-inactivated OP50 | Solid agar | added to the NGM before pouring to the plates | 0.04% DMSO | No effect<br>No effect<br>Improved<br>Improved | sir2.1, skn-1, daf-16 |
|                                      |                                                                                              |         |                      |               |                    |                                                                                           |                                                                                                                           |                                  |                                                                       |                                                                                                     |         |                                                                                           |                                      | Locomotion        | body bending rate                         |          |               |                     |            |                                               |            |                                                |                       |
|                                      |                                                                                              |         |                      |               |                    |                                                                                           |                                                                                                                           |                                  |                                                                       |                                                                                                     |         |                                                                                           |                                      | Autofluorescence  | GFP filter; microscopy + image processing |          |               |                     |            |                                               |            |                                                |                       |
| ROS stress survival                  | Induced with 7 mM tert-butylhydroperoxid                                                     | RW1596  | N2                   | Improved      |                    |                                                                                           |                                                                                                                           |                                  |                                                                       |                                                                                                     |         |                                                                                           |                                      |                   |                                           |          |               |                     |            |                                               |            |                                                |                       |
| ROS levels                           | Measurement of intracellular dichlorofluorescein fluorescence; plate reader                  |         |                      |               |                    |                                                                                           |                                                                                                                           |                                  |                                                                       |                                                                                                     |         |                                                                                           |                                      |                   |                                           |          |               |                     |            |                                               |            |                                                |                       |
| Antioxidant capacity                 | Measurement of dichlorofluorescein fluorescence after incubation with tert-butylhydroperoxid |         |                      |               |                    |                                                                                           |                                                                                                                           |                                  |                                                                       |                                                                                                     |         |                                                                                           |                                      |                   |                                           |          |               |                     |            |                                               |            |                                                |                       |
| <i>Eleutherococcus sessiliflorus</i> | Roots                                                                                        | Aqueous | Crude extracts       | n.d.          | n.d.               | n.d.                                                                                      | 0, 50, 100, 500, and 1000 µg/mL <sup>176</sup>                                                                            | Lifespan                         | Mean and maximum lifespan                                             | N2                                                                                                  | L4      | OP50                                                                                      | Solid agar                           | n.d.              | 0% DMSO                                   | Improved | n.d.          |                     |            |                                               |            |                                                |                       |
|                                      |                                                                                              |         |                      |               |                    |                                                                                           |                                                                                                                           | Thermal stress survival          | Induced with 35 °C                                                    |                                                                                                     |         |                                                                                           |                                      |                   |                                           |          |               |                     |            |                                               |            |                                                |                       |
|                                      |                                                                                              |         |                      |               |                    |                                                                                           |                                                                                                                           | ROS stress survival              | Induced with 20 mM paraquat                                           |                                                                                                     |         |                                                                                           |                                      |                   |                                           |          |               |                     |            |                                               |            |                                                |                       |
|                                      |                                                                                              |         |                      |               |                    |                                                                                           |                                                                                                                           | UV stress survival               | Induced with UV 20 J/cm <sup>2</sup> for 1 min                        |                                                                                                     |         |                                                                                           |                                      |                   |                                           |          |               |                     |            |                                               |            |                                                |                       |
|                                      |                                                                                              |         |                      |               |                    |                                                                                           |                                                                                                                           | Proteotoxicity                   | Paralysis assay with temperature-dependent amyloid beta expression in | CL4176                                                                                              | L1      | Improved                                                                                  |                                      |                   |                                           |          |               |                     |            |                                               |            |                                                |                       |

|                                 |               |                      |                            |                                                                                                                                             |                    |                       |                                                                                                                                                                                                                           |                               |                                                                                                           |                                        |    |                     |                     |                                         |                                         |           |                      |                        |
|---------------------------------|---------------|----------------------|----------------------------|---------------------------------------------------------------------------------------------------------------------------------------------|--------------------|-----------------------|---------------------------------------------------------------------------------------------------------------------------------------------------------------------------------------------------------------------------|-------------------------------|-----------------------------------------------------------------------------------------------------------|----------------------------------------|----|---------------------|---------------------|-----------------------------------------|-----------------------------------------|-----------|----------------------|------------------------|
| <i>Ilex paraguayensis</i>       | Aquifoliaceae | Leaves               | Aqueous                    | Crude extract                                                                                                                               | n.d.               | HPLC-UV               | Several constituents were identified and quantified by HPLC-UV by comparison with standards (Gallic acid, catechin, chlorogenic acid, caffeic acid, caffeine theobromine, epigallocatechin, rutin, quercetin, kaempferol) | 1 mg/ml <sup>177</sup>        | ROS stress survival                                                                                       | muscles<br>Induced with 100 µM juglone | N2 | L1                  | OP50                | Solid agar                              | Spread together with OP50 to NGM plates | 0% DMSO   | Improved             | nhr-49                 |
|                                 |               |                      | Aqueous                    | Crude extract                                                                                                                               | n.d.               | n.d.                  | n.d.                                                                                                                                                                                                                      | n.d. <sup>178</sup>           | Lifespan                                                                                                  | Mean lifespan                          | N2 | L1                  | n.d.                | n.d. liquid                             | Diluted in liquid                       | n.d.      | Improved             | daf-16                 |
|                                 |               |                      |                            |                                                                                                                                             |                    |                       |                                                                                                                                                                                                                           | ROS stress survival           | Induced with 1 mM paraquat                                                                                |                                        |    |                     |                     | Improved                                |                                         |           |                      |                        |
|                                 |               |                      |                            |                                                                                                                                             |                    |                       |                                                                                                                                                                                                                           | ROS levels                    | Measurement of intracellular dichlorofluorescein fluorescence                                             |                                        |    |                     |                     | Improved                                |                                         |           |                      |                        |
|                                 |               |                      |                            |                                                                                                                                             |                    | Nuclear translocation | DAF-16::GFP                                                                                                                                                                                                               | TJ356                         | n.d.                                                                                                      |                                        |    | Improved            |                     |                                         |                                         |           |                      |                        |
| <i>Calendula officinalis</i>    | Asteraceae    | Flowers              | Hydroethanolic (80%)       | Crude extract                                                                                                                               | Total antioxidants | n.d.                  | n.d.                                                                                                                                                                                                                      | 50 mg/mL <sup>24</sup>        | Lifespan                                                                                                  | Mean and median lifespan               | N2 | L4                  | UV inactivated OP50 | Solid agar                              | Added onto the surfaces of the NGM      | n.d.      | No effect            | n.d.                   |
|                                 |               |                      | dichloromethane – methanol | Lead-like enhanced extract: Combined dichloromethane and methanol extracts of degreased (hexane) material; tannin depleted by polyamide SPE | n.d.               | n.d.                  | n.d.                                                                                                                                                                                                                      | 25 and 100 µg/ml <sup>2</sup> | Lifespan                                                                                                  | Death Time 50 (DT50)                   | N2 | L4                  | OP50                | S medium                                | Diluted in liquid                       | 1% DMSO   | No effect            | n.d.                   |
| <i>Baccharis trimera</i>        | Herb          | Hydroethanolic (70%) | Crude extract              | Total phenols, total antioxidants                                                                                                           | n.d.               | n.d.                  | 0.5, 5, and 50 mg/mL <sup>179</sup>                                                                                                                                                                                       | Lifespan                      | Mean, maximum and median lifespan                                                                         | BA17                                   | L1 | OP50                | Solid agar          | mixed with OP50 before spreading to NGM | 0% DMSO                                 | No effect | daf-16, skn-1, hsp-4 |                        |
|                                 |               |                      |                            |                                                                                                                                             |                    |                       |                                                                                                                                                                                                                           | ROS stress survival           | Induced with 7.5 mM tert-butyl hydroperoxide                                                              | N2                                     |    |                     |                     |                                         |                                         |           |                      | Kanamycin treated OP50 |
|                                 |               |                      |                            |                                                                                                                                             |                    |                       |                                                                                                                                                                                                                           | ROS levels                    | Measurement of intracellular dichlorofluorescein fluorescence                                             |                                        |    |                     |                     |                                         |                                         |           |                      |                        |
|                                 |               |                      |                            |                                                                                                                                             |                    |                       |                                                                                                                                                                                                                           | Antioxidant capacity          | Measurement of dichlorofluorescein fluorescence without or after incubation with tert-butyl hydroperoxide |                                        |    |                     |                     |                                         |                                         |           |                      |                        |
|                                 |               |                      |                            |                                                                                                                                             |                    |                       |                                                                                                                                                                                                                           | Proteotoxicity                | Paralysis assay with temperature-dependent amyloid beta expression in muscles                             | CL4176                                 |    |                     |                     |                                         |                                         |           |                      |                        |
| <i>Matricaria recutita</i>      | Flowers       | Hydroethanolic (80%) | Crude extract              | Total antioxidants                                                                                                                          | n.d.               | n.d.                  | 50 mg/mL <sup>24</sup>                                                                                                                                                                                                    | Lifespan                      | Mean and median lifespan                                                                                  | N2                                     | L4 | UV inactivated OP50 | Solid agar          | Added onto the surfaces of the NGM      | n.d.                                    | No effect | n.d.                 |                        |
| <i>Chrysanthemum morifolium</i> | Flowers       | Hydroethanolic (80%) | Crude extract              | Total antioxidants                                                                                                                          | n.d.               | n.d.                  | 50 mg/mL <sup>24</sup>                                                                                                                                                                                                    | Lifespan                      | Mean and median lifespan                                                                                  | N2                                     | L4 | UV inactivated OP50 | Solid agar          | Added onto the surface                  | n.d.                                    | No effect | n.d.                 |                        |



|                                       |                                       |                      |                                                                                                                                                                                                                                                                                 |                                                                     |                                                                                                                                                                                                 |                                                                                                                                                                                                                                   |                                           |                                                                               |                                                                                 |       |          |                       |                   |                                    |           |           |          |                                                  |
|---------------------------------------|---------------------------------------|----------------------|---------------------------------------------------------------------------------------------------------------------------------------------------------------------------------------------------------------------------------------------------------------------------------|---------------------------------------------------------------------|-------------------------------------------------------------------------------------------------------------------------------------------------------------------------------------------------|-----------------------------------------------------------------------------------------------------------------------------------------------------------------------------------------------------------------------------------|-------------------------------------------|-------------------------------------------------------------------------------|---------------------------------------------------------------------------------|-------|----------|-----------------------|-------------------|------------------------------------|-----------|-----------|----------|--------------------------------------------------|
| <i>Erigeron breviscapus</i>           | Flowers (tubular flowers)             | Hydroethanolic (80%) | Crude extract                                                                                                                                                                                                                                                                   | Total phenols, total flavonoids, total terpenes, total antioxidants | n.d.                                                                                                                                                                                            | n.d.                                                                                                                                                                                                                              | 50 mg/mL <sup>24</sup>                    | Lifespan                                                                      | Mean and median lifespan                                                        | N2    | L4       | UV inactivated OP50   | Solid agar        | Added onto the surfaces of the NGM | n.d.      | Improved  | n.d.     |                                                  |
| <i>Carthamus tinctorius</i>           | Flowers (tubular flowers)             | Hydroethanolic (80%) | Crude extract                                                                                                                                                                                                                                                                   | Total phenols, total flavonoids, total terpenes, total antioxidants | n.d.                                                                                                                                                                                            | n.d.                                                                                                                                                                                                                              | 50 mg/mL <sup>24</sup>                    | Lifespan                                                                      | Mean and median lifespan                                                        | N2    | L4       | UV inactivated OP50   | Solid agar        | Added onto the surfaces of the NGM | n.d.      | Improved  | n.d.     |                                                  |
| <i>Tagetes erecta</i>                 | Flowers                               | Hydroethanolic (80%) | Crude extract                                                                                                                                                                                                                                                                   | Total phenols, total flavonoids, total terpenes, total antioxidants | n.d.                                                                                                                                                                                            | n.d.                                                                                                                                                                                                                              | 50 mg/mL <sup>24</sup>                    | Lifespan                                                                      | Mean and median lifespan                                                        | N2    | L4       | UV inactivated OP50   | Solid agar        | Added onto the surfaces of the NGM | n.d.      | Improved  | n.d.     |                                                  |
|                                       | Flowers (yellow cultivar ray flowers) | Ethanol              | Crude extract                                                                                                                                                                                                                                                                   | Total phenols, total antioxidants                                   | HPLC-MS <sup>2</sup>                                                                                                                                                                            | Nine compounds were tentatively identified HPLC-MS <sup>2</sup> (e.g. digallic acid, laricitrin-dihexosides, myricetin-hexoside, laricitrin-galloyl-hexoside, laricitrin-hexosides, laricitrin)                                   | 50, 75, 125, and 250 µg/mL <sup>180</sup> | Lifespan                                                                      | Mean lifespan                                                                   | N2    | A        | OP50                  | S medium          | Diluted in liquid                  | 0% DMSO   | Improved  | n.d.     |                                                  |
|                                       |                                       |                      |                                                                                                                                                                                                                                                                                 |                                                                     |                                                                                                                                                                                                 |                                                                                                                                                                                                                                   |                                           | ROS stress survival                                                           | Induced with 150 µM juglone                                                     |       |          |                       | L1                | Solid agar                         |           |           |          | n.d.                                             |
| Proteotoxicity                        |                                       |                      |                                                                                                                                                                                                                                                                                 |                                                                     |                                                                                                                                                                                                 |                                                                                                                                                                                                                                   |                                           | Paralysis assay with temperature-dependent amyloid beta expression in muscles | CL4176                                                                          |       | Improved |                       |                   |                                    |           |           |          |                                                  |
| Flowers (orange cultivar ray flowers) | Ethanol                               | Crude extract        | Total phenols, total antioxidants                                                                                                                                                                                                                                               | HPLC-MS <sup>2</sup>                                                | Nine compounds were tentatively identified HPLC-MS <sup>2</sup> (e.g. digallic acid, laricitrin-dihexosides, myricetin-hexoside, laricitrin-galloyl-hexoside, laricitrin-hexosides, laricitrin) | 50, 75, 125, and 250 µg/mL <sup>180</sup>                                                                                                                                                                                         | Lifespan                                  | Mean lifespan                                                                 | N2                                                                              | A     | OP50     | S medium              | Diluted in liquid | 0% DMSO                            | Improved  | n.d.      |          |                                                  |
|                                       |                                       |                      |                                                                                                                                                                                                                                                                                 |                                                                     |                                                                                                                                                                                                 |                                                                                                                                                                                                                                   | ROS stress survival                       | Induced with 150 µM juglone                                                   |                                                                                 |       |          | L1                    | Solid agar        |                                    |           |           | n.d.     | Improved                                         |
|                                       |                                       |                      |                                                                                                                                                                                                                                                                                 |                                                                     |                                                                                                                                                                                                 |                                                                                                                                                                                                                                   | Proteotoxicity                            | Paralysis assay with temperature-dependent amyloid beta expression in muscles | CL4176                                                                          |       | Improved |                       |                   |                                    |           |           |          |                                                  |
| <i>Artemisia selengensis</i>          | Leaves                                | Hydroethanolic (50%) | Fraction obtained as followed: Consecutive liquid-liquid partition of crude extraction solvent with petrol ether and ethyl acetate; ethyl acetate fraction was loaded onto HP20 resin column and washed with water and 50% ethanol. The tested fraction was eluted with ethanol | n.d.                                                                | HPLC-UV                                                                                                                                                                                         | Major constituents were quantified with HPLC-UV and reference compounds (chlorogenic acid, 1,4-dicaffeoylquinic acid, 3,4-dicaffeoylquinic acid, 1,5-dicaffeoylquinic acid, 3,5-dicaffeoylquinic acid, 4,5-dicaffeoylquinic acid) | 60, 240 and 360 µg/mL <sup>181</sup>      | Lifespan                                                                      | Mean lifespan                                                                   | N2    | L4       | Heat-inactivated OP50 | S medium          | Diluted in liquid                  | 0.6% DMSO | Improved  | Improved | <i>daf-16, skn-1, daf-2, age-1, sgk-1, akt-1</i> |
|                                       |                                       |                      |                                                                                                                                                                                                                                                                                 |                                                                     |                                                                                                                                                                                                 |                                                                                                                                                                                                                                   |                                           | Locomotion                                                                    | Number of body bends                                                            |       |          |                       |                   |                                    |           |           |          |                                                  |
|                                       |                                       |                      |                                                                                                                                                                                                                                                                                 |                                                                     |                                                                                                                                                                                                 |                                                                                                                                                                                                                                   |                                           | Pharyngeal pumping                                                            | Pumping rate                                                                    | TJ356 |          |                       |                   |                                    |           |           |          |                                                  |
|                                       |                                       |                      |                                                                                                                                                                                                                                                                                 |                                                                     |                                                                                                                                                                                                 |                                                                                                                                                                                                                                   |                                           | Autofluorescence                                                              | Filter (485/528) microscopy + image processing                                  |       |          |                       |                   |                                    |           |           |          |                                                  |
|                                       |                                       |                      |                                                                                                                                                                                                                                                                                 |                                                                     |                                                                                                                                                                                                 |                                                                                                                                                                                                                                   |                                           | thermal stress survival                                                       | Induced with 37 °C                                                              |       |          |                       |                   |                                    |           |           |          |                                                  |
|                                       |                                       |                      |                                                                                                                                                                                                                                                                                 |                                                                     |                                                                                                                                                                                                 |                                                                                                                                                                                                                                   |                                           | ROS stress survival                                                           | Induced with 1 mM H <sub>2</sub> O <sub>2</sub>                                 |       |          |                       |                   |                                    |           |           |          |                                                  |
|                                       |                                       |                      |                                                                                                                                                                                                                                                                                 |                                                                     |                                                                                                                                                                                                 |                                                                                                                                                                                                                                   |                                           | ROS levels                                                                    | Measurement of intracellular dichlorofluorescein fluorescence with plate reader |       |          |                       |                   |                                    |           |           |          |                                                  |
|                                       |                                       |                      |                                                                                                                                                                                                                                                                                 |                                                                     |                                                                                                                                                                                                 |                                                                                                                                                                                                                                   |                                           | Nuclear translocation                                                         | DAF-16::GFP                                                                     |       |          |                       |                   |                                    |           |           |          |                                                  |
| <i>Cirsium japonicum</i>              | Aerial parts                          | Hydroethanolic (70%) | Crude extract                                                                                                                                                                                                                                                                   | Total antioxidants                                                  | HPLC-MS                                                                                                                                                                                         | 3 compounds identified with HPLC-MS and references (chlorogenic acid, linarin, pectolinarin)                                                                                                                                      | 25, 50 and 100 µg/mL <sup>182</sup>       | Lifespan                                                                      | Medium and maximum lifespan                                                     | N2    | L4       | OP50                  | Solid agar        | n.d.                               | n.d.      | No effect | n.d.     |                                                  |
|                                       |                                       |                      |                                                                                                                                                                                                                                                                                 |                                                                     |                                                                                                                                                                                                 |                                                                                                                                                                                                                                   |                                           | Pharyngeal pumping                                                            | Pumping rate                                                                    |       | L1       |                       |                   |                                    |           | Improved  |          |                                                  |

|                              |                                                                               |                    |                            |                                                                                                                                             |                                                                     |         |                                                                                                                      |                                                 |                     |                                                                             |    |        |                     |            |                                    |                            |             |                      |
|------------------------------|-------------------------------------------------------------------------------|--------------------|----------------------------|---------------------------------------------------------------------------------------------------------------------------------------------|---------------------------------------------------------------------|---------|----------------------------------------------------------------------------------------------------------------------|-------------------------------------------------|---------------------|-----------------------------------------------------------------------------|----|--------|---------------------|------------|------------------------------------|----------------------------|-------------|----------------------|
|                              |                                                                               |                    |                            |                                                                                                                                             |                                                                     |         |                                                                                                                      |                                                 | ROS stress survival | Induced with 3 mM paraquat                                                  |    |        |                     |            |                                    |                            | Improved    |                      |
|                              |                                                                               |                    |                            |                                                                                                                                             |                                                                     |         |                                                                                                                      |                                                 | ROS levels          | Measurement of intracellular dichlorofluorescein fluorescence; Plate reader |    |        |                     |            |                                    |                            | Improved    |                      |
| <i>Silybum marianum</i>      |                                                                               | Seeds              | n.d.                       | Flavanolignane complex (silymarin)                                                                                                          |                                                                     |         |                                                                                                                      | 10 and 50 $\mu$ M <sup>67</sup>                 | Lifespan            | Mean lifespan                                                               | N2 | Adu It | UV-irradiated OP50  | Solid agar | Added onto bacterial lawn          | DMSO (1%)                  | Improved    |                      |
| <i>Peucedanum ostruthium</i> | Apiaceae                                                                      | Roots and rhizomes | Dichloromethane – methanol | Lead-like enhanced extract: Combined dichloromethane and methanol extracts of degreased (hexane) material, tannin depleted by polyamide SPE | n.d.                                                                | n.d.    | n.d.                                                                                                                 | 25 and 100 $\mu$ g/ml <sup>2</sup>              | Lifespan            | Death Time 50 (DT50)                                                        | N2 | L4     | OP50                | S medium   | Diluted in liquid                  | 1% DMSO                    | Detrimental | n.d.                 |
| <i>Vicatia thibetica</i>     |                                                                               | Roots              | Aqueous                    | Crude extract                                                                                                                               | n.d.                                                                | n.d.    | n.d.                                                                                                                 | 200 $\mu$ g/mL or 400 $\mu$ g/mL <sup>183</sup> | Lifespan            | Mean lifespan                                                               | N2 | L4     | OP50                | Solid agar | n.d.                               | n.d.                       | Improved    | <i>daf-16, hsf-1</i> |
|                              |                                                                               |                    |                            |                                                                                                                                             |                                                                     |         |                                                                                                                      |                                                 | Locomotion          | Number of body bends                                                        |    |        |                     |            |                                    |                            | Improved    |                      |
|                              |                                                                               |                    |                            |                                                                                                                                             |                                                                     |         |                                                                                                                      |                                                 | Pharyngeal pumping  | Pumping rate                                                                |    |        |                     |            |                                    |                            | Improved    |                      |
| <i>Lonicera japonica</i>     | Caprifoliaceae                                                                | Flowers            | Hydroethanolic (80%)       | Crude extract                                                                                                                               | Total phenols, total flavonoids, total terpenes, total antioxidants | n.d.    | n.d.                                                                                                                 | 50 mg/mL <sup>24</sup>                          | Lifespan            | Mean and Median Lifespan                                                    | N2 | L4     | UV inactivated OP50 | Solid agar | Added onto the surfaces of the NGM | n.d.                       | Improved    | n.d.                 |
|                              |                                                                               | n.d.               | Hydroethanolic (75%)       | Crude extract of degreased material (petrolether and ethylacetat)                                                                           | n.d.                                                                | HPLC-UV | Chlorogenic acid, 1,5-dicaffeoylquinic acid and 1,3-dicaffeoylquinic acid were quantified with HPLC-UV and standards | 500 $\mu$ g/mL <sup>27</sup>                    | Lifespan            | Mean lifespan                                                               | N2 | A      | OP50                | S medium   | Diluted in liquid                  | n.d. concentration of DMSO | Improved    | hsf-1                |
| Locomotion                   | Number of body bends                                                          | Improved           |                            |                                                                                                                                             |                                                                     |         |                                                                                                                      |                                                 |                     |                                                                             |    |        |                     |            |                                    |                            |             |                      |
| Pharyngeal pumping           | Pumping rate                                                                  | Improved           |                            |                                                                                                                                             |                                                                     |         |                                                                                                                      |                                                 |                     |                                                                             |    |        |                     |            |                                    |                            |             |                      |
| thermal stress survival      | Induced with 37°C                                                             | Improved           |                            |                                                                                                                                             |                                                                     |         |                                                                                                                      |                                                 |                     |                                                                             |    |        |                     |            |                                    |                            |             |                      |
| ROS stress survival          | Induced with 200 mM paraquat                                                  | Improved           |                            |                                                                                                                                             |                                                                     |         |                                                                                                                      |                                                 |                     |                                                                             |    |        |                     |            |                                    |                            |             |                      |
| ROS levels                   | Measurement of intracellular dichlorofluorescein fluorescence                 | Improved           |                            |                                                                                                                                             |                                                                     |         |                                                                                                                      |                                                 |                     |                                                                             |    |        |                     |            |                                    |                            |             |                      |
| Nuclear translocation        | DAF-16::GFP                                                                   | TJ356              | No effect                  |                                                                                                                                             |                                                                     |         |                                                                                                                      |                                                 |                     |                                                                             |    |        |                     |            |                                    |                            |             |                      |
| Proteotoxicity               | Paralysis assay with temperature-dependent amyloid beta expression in muscles | CL4176             | Improved                   |                                                                                                                                             |                                                                     |         |                                                                                                                      |                                                 |                     |                                                                             |    |        |                     |            |                                    |                            |             |                      |
| <i>Valeriana officinalis</i> |                                                                               | Roots              | dichloromethane – methanol | Lead-like enhanced extract: Combined dichloromethane and methanol extracts of degreased (hexane) material, tannin depleted by polyamide SPE | n.d.                                                                | n.d.    | n.d.                                                                                                                 | 25 and 100 $\mu$ g/ml <sup>2</sup>              | Lifespan            | Death Time 50 (DT50)                                                        | N2 | L4     | OP50                | S medium   | Diluted in liquid                  | 1% DMSO                    | No effect   | n.d.                 |

## References.

1. W.-Y. Zeng, L. Tan, C. Han, Z.-Y. Zheng, G.-S. Wu, H.-R. Luo and S.-L. Li, *Oxid. Med. Cell. Longevity*, 2021, DOI: 10.1155/2021/7656834, 7656834.
2. J. Zwirchmayr, B. Kirchweger, T. Lehner, A. Tahir, D. Pretsch and J. M. Rollinger, *Sci. Rep.*, 2020, **10**, 12323.
3. K. Koch, N. Weldle, S. Baier, C. Buechter and W. Waetjen, *Eur. J. Nutr.*, 2020, **59**, 137-150.
4. J. Brunquell, S. Morris, A. Snyder and S. D. Westerheide, *Cell Stress Chaperones*, 2018, **23**, 65-75.
5. H. Liu, F. Liang, W. Su, N. Wang, M. Lv, P. Li, Z. Pei, Y. Zhang, X.-Q. Xie, L. Wang and Y. Wang, *J. Ethnopharmacol.*, 2013, **147**, 366-372.
6. B. Kirchweger, L. C. Klein-Junior, D. Pretsch, Y. Chen, S. Cretton, A. L. Gasper, Y. V. Heyden, P. Christen, J. Kirchmair, A. T. Henriques and J. M. Rollinger, *Front Neurosci*, 2022, **16**, 826289.
7. Y.-L. Hsu, H.-S. Hung, C.-W. Tsai, S.-P. Liu, Y.-T. Chiang, Y.-H. Kuo, W.-C. Shyu, S.-Z. Lin and R.-H. Fu, *Int. J. Mol. Sci.*, 2021, **22**, 10240.
8. S.-C. Cheng, W.-H. Li, Y.-C. Shi, P.-L. Yen, H.-Y. Lin, V. H.-C. Liao and S.-T. Chang, *J. Agric. Food Chem.*, 2014, **62**, 4159-4165.
9. J. H. Kim, I. H. Bang, Y. J. Noh, D. K. Kim, E. J. Bae and I. H. Hwang, *International journal of molecular sciences*, 2020, **21**, 2212.
10. E. B. Lee, J. H. Kim, C. W. An, Y. J. Kim, Y. J. Noh, S. J. Kim, J.-E. Kim, A. C. Shrestha, H.-N. Ham, J.-Y. Leem, H.-K. Jo, D.-S. Kim, K. H. Moon, J. H. Lee, K. O. Jeong and D. K. Kim, *Biomol. Ther.*, 2018, **26**, 568-575.
11. C. Aaron, G. Beaudry, J. A. Parker and M. Therrien, *J. Agric. Food Chem.*, 2016, **64**, 3338-3344.
12. J. C. Garcia-Moreno, M. Porta de la Riva, E. Martínez-Lara, E. Siles and A. Cañuelo, *Neurobiology of aging*, 2019, **82**, 60-68.
13. A. Cañuelo, B. Gilbert-López, P. Pacheco-Liñán, E. Martínez-Lara, E. Siles and A. Miranda-Vizueté, *Mechanisms of Ageing and Development*, 2012, **133**, 563-574.
14. Y. Wang, S. Luo, Z. Xu, L. Liu, S. Feng, T. Chen, L. Zhou, M. Yuan, Y. Huang and C. b. Ding, *Arabian J. Chem.*, 2021, **14**, 103149.
15. J. M. Romero-Marquez, M. D. Navarro-Hortal, V. Jimenez-Trigo, P. Munoz-Ollero, T. Y. Forbes-Hernandez, A. Esteban-Munoz, F. Giampieri, I. Delgado Noya, P. Bullon, L. Vera-Ramirez, M. Battino, C. Sanchez-Gonzalez and J. L. Quiles, *Antioxidants*, 2022, **11**, 629.
16. G. Di Rosa, N. Saul, C. Schmitz-Linneweber and V. Calabrese, *Pathophysiology*, 2018, **25**, 203.
17. R.-H. Fu, H.-J. Harn, S.-P. Liu, C.-S. Chen, W.-L. Chang, Y.-M. Chen, J.-E. Huang, R.-J. Li, S.-Y. Tsai, H.-S. Hung, W.-C. Shyu, S.-Z. Lin and Y.-C. Wang, *PLoS One*, 2014, **9**, e85305/85301.
18. J. S. Sangha, D. Fan, A. H. Banskota, R. Stefanova, W. Khan, J. Hafting, J. Craigie, A. T. Critchley and B. Prithiviraj, *J. Funct. Foods*, 2013, **5**, 1180-1190.
19. S. Tiwari, S. Singh, P. Pandey, S. K. Saikia, A. S. Negi, S. K. Gupta, R. Pandey and S. Banerjee, *Protoplasma*, 2014, **251**, 1089-1098.
20. R. Ratnappan, F. R. G. Amrit, S.-W. Chen, H. Gill, K. Holden, J. Ward, K. R. Yamamoto, C. P. Olsen and A. Ghazi, *PLOS Genetics*, 2014, **10**, e1004829.
21. S.-J. Lee, A. B. Hwang and C. Kenyon, *Current Biology*, 2010, **20**, 2131-2136.
22. S. Han, E. A. Schroeder, C. G. Silva-García, K. Hebestreit, W. B. Mair and A. Brunet, *Nature*, 2017, **544**, 185-190.
23. S. Hao, X. Li, A. Han, Y. Yang, X. Luo, G. Fang, H. Wang, J. Liu and S. Wang, *J. Agric. Food Chem.*, 2020, **68**, 8788-8796.
24. Q. Chen, X. Yang, E. Capanoglu, A. T. Amrouche, L. Wu, J. Luo, Y. Zhu, Y. Wang, X. Jiang, D. Zhang and B. Lu, *Food Funct.*, 2023, **14**, 457-470.
25. A. Iriondo-DeHong, P. Martorell, S. Genoves, D. Ramon, K. Stamatakis, M. Fresno, A. Molina and M. Dolores del Castillo, *Molecules*, 2016, **21**, 721/721.
26. L. Amigoni, M. Stuknyte, C. Ciaramelli, C. Magoni, I. Bruni, I. De Noni, C. Airoldi, M. E. Regonesi and A. Palmioli, *J. Funct. Foods*, 2017, **33**, 297-306.
27. Z.-Z. Yang, Y.-T. Yu, H.-R. Lin, D.-C. Liao, X.-H. Cui and H.-B. Wang, *Free Radical Biol. Med.*, 2018, **129**, 310-322.
28. M. Maulik, S. Mitra, S. Hunter, M. Hunstiger, S. R. Oliver, A. Bult-Ito and B. E. Taylor, *Sci. Rep.*, 2018, **8**, 1-13.
29. E. Wang, N. Wang, Y. Zou, M. Fahim, Y. Zhou, H. Yang, Y. Liu and H. Li, *Food Res. Int.*, 2022, **160**, 111696.
30. X. Wu, M. Al-Amin, C. Zhao, F. An, Y. Wang, Q. Huang, H. Teng and H. Song, *Food Funct.*, 2020, **11**, 5621-5634.
31. D. J. Deusing, S. Winter, A. Kler, E. Kriesl, B. Bonnlaender, U. Wenzel and E. Fitzenberger, *Fitoterapia*, 2015, **102**, 163-170.
32. M. Roxo, H. Peixoto, P. Wetterauer, E. Lima and M. Wink, *Oxid. Med. Cell. Longevity*, 2020, DOI: 10.1155/2020/7590707, 7590707.
33. C. Duangjan, P. Rangsinth, X. Gu, M. Wink and T. Tencomnao, *Oxid. Med. Cell. Longevity*, 2019, DOI: 10.1155/2019/9012396, 9012396.

34. C. Duangjan, P. Rangsinth, X. Gu, S. Zhang, M. Wink and T. Tencomnao, *Phytomedicine*, 2019, **64**, 153061.
35. W. B. Bakrim, A. D. R. Nurcahyanti, M. Dmirieh, I. Mahdi, A. M. Elgamal, M. A. El Raey, M. Wink and M. Sobeh, *Oxid. Med. Cell. Longevity*, 2022, DOI: 10.1155/2022/3486257, 3486257.
36. N. M. Hegazi, M. Sobeh, S. Rezaq, M. A. El-Raey, M. Dmirieh, A. M. El-Shazly, M. F. Mahmoud and M. Wink, *Sci. Rep.*, 2019, **9**, 1-12.
37. M. A. O. Abdelfattah, M. Dmirieh, W. Ben Bakrim, O. Mouhtady, M. A. Ghareeb, M. Wink and M. Sobeh, *J. Ethnopharmacol.*, 2022, **292**, 115187.
38. S. Thabit, H. Handoussa, M. Roxo, B. Cestari de Azevedo, N. S. E. El Sayed and M. Wink, *Molecules*, 2019, **24**, 2633.
39. J. Zheng, D. Heber, M. Wang, C. Gao, S. B. Heymsfield, R. J. Martin, F. L. Greenway, J. W. Finley, J. H. Burton, W. D. Johnson, F. M. Enright, M. J. Keenan and Z. Li, *Int J Vitam Nutr Res*, 2017, **87**, 149-158.
40. D. Ryu, L. Mouchiroud, P. A. Andreux, E. Katsyuba, N. Moullan, A. A. Nicolet-Dit-Félix, E. G. Williams, P. Jha, G. Lo Sasso, D. Huzard, P. Aebischer, C. Sandi, C. Rinsch and J. Auwerx, *Nat Med*, 2016, **22**, 879-888.
41. Y. Chen, B. Onken, H. Chen, S. Xiao, X. Liu, M. Driscoll, Y. Cao and Q. Huang, *J. Agric. Food Chem.*, 2014, **62**, 3422-3431.
42. C. W. Yu, C. C. Wei and V. H. C. Liao, *Free Radical Research*, 2014, **48**, 371-379.
43. A. Takahashi, T. Watanabe, T. Fujita, T. Hasegawa, M. Saito and M. Sukanuma, *Biosci., Biotechnol., Biochem.*, 2014, **78**, 1206-1211.
44. M. Liao, Y. Zhao, L. Huang, B. Cheng and K. Huang, *RSC Adv.*, 2016, **6**, 86640-86649.
45. D. Carmona-Gutierrez, A. Zimmermann, K. Kainz, F. Pietrocola, G. Chen, S. Maglioni, A. Schiavi, J. Nah, S. Mertel, C. B. Beuschel, F. Castoldi, V. Sica, G. Trausinger, R. Raml, C. Sommer, S. Schroeder, S. J. Hofer, M. A. Bauer, T. Pendl, J. Tadic, C. Dammbroeck, Z. Hu, C. Ruckstuhl, T. Eisenberg, S. Durand, N. Bossut, F. Aprahamian, M. Abdellatif, S. Sedej, D. P. Enot, H. Wolinski, J. Dengjel, O. Kepp, C. Magnes, F. Sinner, T. R. Pieber, J. Sadoshima, N. Ventura, S. J. Sigrist, G. Kroemer and F. Madeo, *Nat. Commun.*, 2019, **10**, 1-17.
46. C. Büchter, D. Ackermann, S. Havermann, S. Honnen, Y. Chovolou, G. Fritz, A. Kampkötter and W. Wätjen, *International journal of molecular sciences*, 2013, **14**, 11895-11914.
47. G. Grünz, K. Haas, S. Soukup, M. Klingenspor, S. E. Kulling, H. Daniel and B. Spanier, *Mechanisms of Ageing and Development*, 2012, **133**, 1-10.
48. S. Havermann, R. Rohrig, Y. Chovolou, H. U. Humpf and W. Wätjen, *J Agric Food Chem*, 2013, **61**, 2158-2164.
49. S. M. A. Sayed, K. Siems, C. Schmitz-Linneweber, W. Luyten and N. Saul, *Front. Pharmacol.*, 2021, **12**, 604435.
50. K. Barathikannan, R. Chelliah, S.-J. Yeon, A. Tyagi, F. Elahi, S. Vijayalakshmi, P. Agastian, V. Arockiasami and D. Hawn Oh, *Food Chem.*, 2023, **404**, 134710.
51. M. J. Jara-Palacios, S. Gonzalez-Manzano, M. L. Escudero-Gilete, D. Hernanz, M. Duenas, A. M. Gonzalez-Paramas, F. J. Heredia and C. Santos-Buelga, *J. Agric. Food Chem.*, 2013, **61**, 5114-5121.
52. J. Zhang, Y. Xiao, Y. Guan, X. Rui, Y. Zhang, M. Dong and W. Ma, *J. Food Biochem.*, 2019, **43**, n/a.
53. A. Upadhyay, J. Chompoo, N. Taira, M. Fukuta and S. Tawata, *Biosci., Biotechnol., Biochem.*, 2013, **77**, 217-223.
54. D. Pretsch, J. M. Rollinger, A. Schmid, M. Genov, T. Wohrer, L. Krenn, M. Moloney, A. Kasture, T. Hummel and A. Pretsch, *Sci Rep*, 2020, **10**, 11707.
55. R.-T. Tsai, C.-W. Tsai, S.-P. Liu, J.-X. Gao, Y.-H. Kuo, P.-M. Chao, H.-S. Hung, W.-C. Shyu, S.-Z. Lin and R.-H. Fu, *Journal*, 2020, **21**.
56. E. B. Lee, M. M. Xing and D. K. Kim, *Arch. Pharmacol Res.*, 2017, **40**, 825-835.
57. M. Tao, R. Li, T. Xu, Z. Zhang, T. Wu, S. Pan and X. Xu, *Food Funct.*, 2021, **12**, 8196-8207.
58. B. Tsolmon, Y. Fang, T. Yang, L. Guo, K. He, G.-Y. Li and H. Zhao, *Food Chem.*, 2021, **343**, 128392.
59. Y. Qu, L. Shi, Y. Liu, L. Huang, H.-R. Luo and G.-S. Wu, *Oxid. Med. Cell. Longevity*, 2022, DOI: 10.1155/2022/8878923, 8878923.
60. S. M. A. Sayed, S. Alseekh, K. Siems, A. R. Fernie, W. Luyten, C. Schmitz-Linneweber and N. Saul, *Nutrients*, 2022, **14**, 4199.
61. T. Yang, L. Fang, T. Lin, J. Li, Y. Zhang, A. Zhou and J. Xie, *J. Ethnopharmacol.*, 2019, **239**, 111886.
62. Q. Zhu, Y. Qu, X.-G. Zhou, J.-N. Chen, H.-R. Luo and G.-S. Wu, *Oxid. Med. Cell. Longevity*, 2020, DOI: 10.1155/2020/6069354, 6069354.

63. L. P. Arantes, D. Colle, M. L. Machado, D. C. Zamberlan, C. L. C. Tassi, R. C. da Cruz, M. P. Manfron, M. L. Athayde and F. A. A. Soares, *Ind. Crops Prod.*, 2014, **62**, 265-271.
64. Y. Niu, J. Liao, H. Zhou, C.-c. Wang, L. Wang and Y. Fan, *Molecules*, 2022, **27**, 4952.
65. C.-C. Wei, C.-W. Yu, P.-L. Yen, H.-Y. Lin, S.-T. Chang, F.-L. Hsu and V. H.-C. Liao, *J. Agric. Food Chem.*, 2014, **62**, 10701-10707.
66. M. F. M. Sciacca, V. Romanucci, A. Zarrelli, I. Monaco, F. Lolicato, N. Spinella, C. Galati, G. Grasso, L. D'Urso, M. Romeo, L. Diomede, M. Salmona, C. Bongiorno, G. Di Fabio, C. La Rosa and D. Milardi, *ACS Chem. Neurosci.*, 2017, **8**, 1767-1778.
67. K. Filippopoulou, N. Papaevgeniou, M. Lefaki, A. Paraskevopoulou, D. Biedermann, V. Kren and N. Chondrogianni, *Free Radical Biol. Med.*, 2017, **103**, 256-267.
68. J. Li, D. Liu, D. Li, Y. Guo, H. Du and Y. Cao, *Chem. Biodiversity*, 2022, **19**, e202100685.
69. W. Chen, L. Rezaizadehnajafi and M. Wink, *J. Pharm. Pharmacol.*, 2013, **65**, 682-688.
70. N. Fischer, C. Buechter, K. Koch, S. Albert, R. Csuk and W. Waetjen, *J. Pharm. Pharmacol.*, 2017, **69**, 73-81.
71. J. Lee, G. Kwon, J. Park, J.-K. Kim and Y.-H. Lim, *Exp. Biol. Med. (London, U. K.)*, 2016, **241**, 1757-1763.
72. J. Li, Z. Lin, X. Tang, G. Liu, Y. Chen, X. Zhai, Q. Huang and Y. Cao, *Food Funct.*, 2020, **11**, 6595-6607.
73. S. Feng, C. Zhang, T. Chen, L. Zhou, Y. Huang, M. Yuan, T. Li and C. Ding, *Antioxidants*, 2021, **10**, 1697.
74. A. Matencio, M. A. Guerrero-Rubio, F. Caldera, C. Cecone, F. Trotta, F. Garcia-Carmona and J. M. Lopez-Nicolas, *Int. J. Pharm. (Amsterdam, Neth.)*, 2020, **589**, 119862.
75. X. Zhao, L. Lu, Y. Qi, M. Li and L. Zhou, *Biosci., Biotechnol., Biochem.*, 2017, **81**, 1908-1916.
76. Z. Wang, P. Zheng, Y. Xie, X. Chen, N. Solowij, K. Green, Y. L. Chew and X. F. Huang, *FASEB journal : official publication of the Federation of American Societies for Experimental Biology*, 2021, **35**, e21537.
77. M. H. Land, M. L. Toth, L. MacNair, S. A. Vanapalli, T. W. Lefever, E. N. Peters and M. O. Bonn-Miller, *Cannabis and Cannabinoid Research*, 2020, **6**, 522-527.
78. A. P. Vanin, W. A. Tamagno, C. Alves, L. Mesacasa, L. F. Santin, N. T. Sutorillo, D. Bilibio, C. Müller, L. Galon and R. R. Kaizer, *Scientific Reports*, 2022, **12**, 15376.
79. Z. Wang, P. Zheng, X. Chen, Y. Xie, K. Weston-Green, N. Solowij, Y. L. Chew and X.-F. Huang, *GeroScience*, 2022, **44**, 1505-1524.
80. L. Diomede, S. Rigacci, M. Romeo, M. Stefani and M. Salmona, *PLoS one*, 2013, **8**, e58893.
81. M. A. Guerrero-Rubio, S. Hernandez-Garcia, J. Escribano, M. Jimenez-Atienzar, J. Cabanes, F. Garcia-Carmona and F. Gandia-Herrero, *Food Chem.*, 2020, **330**, 127228.
82. M. A. Guerrero-Rubio, S. Hernandez-Garcia, F. Garcia-Carmona and F. Gandia-Herrero, *Food Chem.*, 2019, **274**, 840-847.
83. K. Zarse, S. Jabin and M. Ristow, *Eur. J. Nutr.*, 2012, **51**, 765-768.
84. Y. Gong, Y. Luo, J.-a. Huang, J. Zhang, Y. Peng, Z. Liu and B. Zhao, *J. Funct. Foods*, 2012, **4**, 988-993.
85. W. Jia, Q. Peng, L. Su, X. Yu, C. W. Ma, M. Liang, X. Yin, Y. Zou and Z. Huang, *Mar. Drugs*, 2018, **16**, 444.
86. L. Gao, R. Zhang, J. Lan, R. Ning, D. Wu, D. Chen and W. Zhao, *J. Nat. Prod.*, 2016, **79**, 3039-3046.
87. P. Shukla, A. Pant and R. Pandey, *Curr. Sci.*, 2019, **116**, 959-965.
88. V. Shukla, D. Yadav, S. C. Phulara, M. M. Gupta, S. K. Saikia and R. Pandey, *Free Radical Biol. Med.*, 2012, **53**, 1848-1856.
89. A. Pant, S. K. Saikia, V. Shukla, J. Asthana, B. A. Akhoun and R. Pandey, *Exp. Gerontol.*, 2014, **57**, 81-95.
90. Y. Fu and W. Zhao, *J. Nat. Prod.*, 2020, **83**, 505-515.
91. J. Kim, Y.-G. Kang, D.-h. Choi, Y.-u. Cho, S.-y. Cho, H. Choi and H.-J. Kim, *Exp. Dermatol.*, 2019, **28**, 1270-1278.
92. J. Li, G. Yang, W. Shi, X. Fang, L. Han and Y. Cao, *J. Ethnopharmacol.*, 2022, **296**, 115460.
93. J. Nass, S. Abdelfatah and T. Efferth, *Phytomedicine*, 2021, **84**, 153482.
94. B. A. Akhoun, L. Rathor and R. Pandey, *Exp. Gerontol.*, 2018, **104**, 113-117.
95. B. A. Akhoun, S. Pandey, S. Tiwari and R. Pandey, *Exp. Gerontol.*, 2016, **78**, 47-56.

96. H. Wang, S. Zhang, L. Zhai, L. Sun, D. Zhao, Z. Wang and X. Li, *Food Funct.*, 2021, **12**, 6793-6808.
97. A.-G. Wu, J.-F. Teng, V. K.-W. Wong, X.-G. Zhou, W.-Q. Qiu, Y. Tang, J.-M. Wu, R. Xiong, R. Pan, Y.-L. Wang, B. Tang, T.-Y. Ding, L. Yu, W. Zeng, D.-L. Qin and B. Y.-K. Law, *Phytomedicine*, 2019, **65**, 153088.
98. D. R. Gomez-Linton, S. Alavez, A. Navarro-Ocana, A. Roman-Guerrero, L. Pinzon-Lopez and L. J. Perez-Flores, *Planta Med.*, 2021, **87**, 368-374.
99. Z. Shi, Z. Lu, Y. Zhao, Y. Wang, Z.-W. Xi, P. Guan, X. Duan, Y.-Z. Chang and B. Zhao, *Neurochem. Int.*, 2013, **62**, 940-947.
100. T. Kitisin, W. Suphamungmee and K. Meemon, *J Food Biochem*, 2019, **43**, e13075.
101. V. T. Cuong, W. Chen, J. Shi, M. Zhang, H. Yang, N. Wang, S. Yang, J. Li, P. Yang and J. Fei, *Exp. Gerontol.*, 2019, **117**, 99-105.
102. C. Scerbak, E. Vayndorf, A. Hernandez, C. McGill and B. Taylor, *GeroScience*, 2018, **40**, 151-162.
103. P. Kittimongkolsuk, M. Roxo, H. Li, S. Chuchawankul, M. Wink and T. Tencomnao, *Pharmaceuticals (Basel, Switzerland)*, 2021, **14**.
104. C. Sillapachaiyaporn, P. Rangsinth, S. Nilkhet, A. T. Ung, S. Chuchawankul and T. Tencomnao, *Pharmaceuticals*, 2021, **14**, 1001.
105. P. Aranaz, A. Pena, A. Vettorazzi, M. J. Fabra, A. Martinez-Abad, A. Lopez-Rubio, J. Pera, J. Parlade, M. Castellari, F. I. Milagro and C. J. Gonzalez-Navarro, *Nutrients*, 2021, **13**, 3968.
106. R. Keowkase and N. Weerapreeyakul, *Planta Med.*, 2016, **82**, 516-523.
107. G. Dominguez-Rodriguez, D. Ramon Vidal, P. Martorell, M. Plaza and M. L. Marina, *J. Agric. Food Chem.*, 2022, **70**, 7993-8009.
108. N. Shen, W. Zeng, F. Leng, J. Lu, Z. Lu, J. Cui, L. Wang and B. Jin, *Food Funct.*, 2021, **12**, 12395-12406.
109. S. Pandey, S. Tiwari, A. Kumar, A. Niranjana, J. Chand, A. Lehri and P. S. Chauhan, *Ind. Crops Prod.*, 2018, **120**, 113-122.
110. Z. Zhuang, T. Lv, M. Li, Y. Zhang, T. Xue, L. Yang, H. Liu and W. Zhang, *Plant Foods Hum. Nutr. (N. Y., NY, U. S.)*, 2014, **69**, 304-309.
111. H. N. Kim, H. W. Seo, B. S. Kim, H. J. Lim, H. N. Lee, J. S. Park, Y. J. Yoon, J. W. Oh, M. J. Oh, J. Kwon, C. H. Oh, D. S. Cha and H. Jeon, *Nat. Prod. Sci.*, 2015, **21**, 128-133.
112. S. Govindan, M. Amirthalingam, K. Duraisamy, T. Govindhan, N. Sundararaj and S. Palanisamy, *Biomed. Pharmacother.*, 2018, **102**, 812-822.
113. W. Chen, D. Mueller, E. Richling and M. Wink, *J. Agric. Food Chem.*, 2013, **61**, 3047-3053.
114. L. de Freitas Bonomo, D. N. Silva, P. F. Boasquivis, F. A. Paiva, J. F. da Costa Guerra, T. A. F. Martins, A. Gustavo de Jesus Torres, I. T. B. Raposo de Paula, W. L. Caneschi, P. Jacolot, N. Grossin, F. J. Tessier, E. Boulanger, M. E. Silva, M. L. Pedrosa and R. de Paula Oliveira, *PLoS One*, 2014, **9**, e89933/89931.
115. H. Peixoto, M. Roxo, S. Krstin, T. Roehrig, E. Richling and M. Wink, *J. Agric. Food Chem.*, 2016, **64**, 1283-1290.
116. W. Cai, J. Wu, X. Wang, J. Huang, Z. Shen and X. Chen, *Tradit. Med. Mod. Med.*, 2019, **2**, 19-25.
117. S. Jiang, N. Deng, B. Zheng, T. Li and R. H. Liu, *Food Funct.*, 2021, **12**, 4471-4483.
118. Y.-X. Chen, P. T. N. Le, T.-T. Tzeng, T.-H. Tran, A. T. Nguyen, I. H.-J. Cheng, C.-Y. F. Huang, Y.-J. Shiao and T.-T. Ching, *Nutrients*, 2021, **13**, 4317.
119. S. Feng, L. Fu, Y. Wang, H. Wang, M. Yuan, Y. Huang, H. Yang and C. Ding, *Pharmacogn. Mag.*, 2019, **15**, 514-522.
120. H. Jeon and D. S. Cha, *Chin. J. Nat. Med. (Amsterdam, Neth.)*, 2016, **14**, 335-342.
121. I. Reigada, C. Moliner, M. S. Valero, D. Weinkove, E. Langa and C. Gomez Rincon, *J. Med. Food*, 2020, **23**, 72-78.
122. Q. Ruan, Y. Qiao, Y. Zhao, Y. Xu, M. Wang, J. Duan and D. Wang, *J. Ethnopharmacol.*, 2016, **177**, 101-110.
123. M. Sobeh, M. F. Mahmoud, R. A. Hasan, H. Cheng, A. M. El-Shazly and M. Wink, *Molecules*, 2017, **22**, 1502/1501.
124. M. Sobeh, M. F. Mahmoud, M. A. O. Abdelfattah, H. Cheng, A. M. El-Shazly and M. Wink, *J. Ethnopharmacol.*, 2018, **213**, 38-47.
125. S. Ibe, K. Kumada, K. Yoshida and K. Otake, *Biosci., Biotechnol., Biochem.*, 2013, **77**, 392-394.
126. P. Rangsinth, A. Prasansuklab, C. Duangjan, X. Gu, K. Meemon, M. Wink and T. Tencomnao, *BMC Complementary Altern. Med.*, 2019, **19**, 1-13.
127. N. R. Leite, L. C. Alves de Araujo, P. dos Santos da Rocha, D. A. Agarrayua, D. S. Avila, C. A. Carollo, D. B. Silva, L. M. Estevinho, K. de Picoli Souza and E. L. dos Santos, *Biomolecules*, 2020, **10**, 1106.
128. S. L. Johnson, H. Y. Park, N. A. DaSilva, D. A. Vattam, H. Ma and N. P. Seeram, *Nutrients*, 2018, **10**, 1139/1131.
129. F. Yan, Y. Yang, L. Yu and X. Zheng, *J. Agric. Food Chem.*, 2017, **65**, 7457-7466.

130. W. Chen, I. R. Sudji, E. Wang, E. Joubert, B.-E. van Wyk and M. Wink, *Phytomedicine*, 2013, **20**, 380-386.
131. W. Zeng, A. G. Wu, X.-G. Zhou, I. Khan, R. L. Zhang, H. H. Lo, L. Q. Qu, L. L. Song, X. Y. Yun, H. M. Wang, J. Chen, J. P. L. Ng, F. Ren, S. Y. Yuan, L. Yu, Y. Tang, G. X. Huang, V. K. W. Wong, S. K. Chung, S. W. F. Mok, D. L. Qin, H. L. Sun, L. Liu, W. L. W. Hsiao and B. Y. K. Law, *Pharmacol. Res.*, 2021, **170**, 105697.
132. C. Lin, Y. Lin, Y. Chen, J. Xu, J. Li, Y. Cao, Z. Su and Y. Chen, *Food Funct.*, 2019, **10**, 3237-3251.
133. M. Wu, J. Cai, Z. Fang, S. Li, Z. Huang, Z. Tang, Q. Luo and H. Chen, *Nutrients*, 2022, **14**, 857.
134. M. Filafarro, A. Codeluppi, V. Brighenti, F. Cimurri, A. M. Gonzalez-Paramas, C. Santos-Buelga, D. Bertelli, F. Pellati and G. Vitale, *Antioxidants*, 2022, **11**, 211.
135. X. Wang, X. Li, L. Li, X. Yang, J. Wang, X. Liu, J. Chen, S. Liu, N. Zhang, J. Li and H. Wang, *Food Funct.*, 2022, **13**, 10680-10694.
136. D. Huang, C. Li, Q. Chen, X. Xie, X. Fu, C. Chen, Q. Huang, Z. Huang and H. Dong, *Food Chem.*, 2022, **377**, 131922.
137. L. Rivas-Garcia, J. L. Quiles, C. Roma-Rodrigues, L. R. Raposo, M. D. Navarro-Hortal, J. M. Romero-Marquez, A. Esteban-Munoz, A. Varela-Lopez, L. C. Garcia, D. Cianciosi, T. Y. Forbes Hernandez, M. Battino, J. Llopis, A. R. Fernandes, P. V. Baptista and C. Sanchez-Gonzalez, *Food Chem. Toxicol.*, 2021, **149**, 112018.
138. B. Song, B. Zheng, T. Li and R. H. Liu, *Food Funct.*, 2020, **11**, 3598-3609.
139. F. Yan, X.-a. Chen and X. Zheng, *Food Res. Int.*, 2017, **102**, 213-224.
140. S. Zheng, S. Liao, Y. Zou, Z. Qu, W. Shen and Y. Shi, *Age (Dordrecht, Neth.)*, 2014, **36**, 1-13.
141. H. Peixoto, M. Roxo, E. Silva, K. Valente, M. Braun, X. Wang and M. Wink, *Molecules*, 2019, **24**, 915/911.
142. J. Chen, J. Zhang, Y. Xiang, L. Xiang, Y. Liu, X. He, X. Zhou, X. Liu and Z. Huang, *Food Funct.*, 2016, **7**, 943-952.
143. N. Pattarachotananant, N. Sornkaew, W. Warayanon, P. Rangsinth, C. Sillapachaiyaporn, W. Vongthip, S. Chuchawankul, A. Prasansuklab and T. Tencomnao, *Nutrients*, 2022, **14**, 3668.
144. H. Ma, N. A. DaSilva, W. Liu, P. P. Nahar, Z. Wei, Y. Liu, P. T. Pham, R. Crews, D. A. Vatter, A. L. Slitt, Z. A. Shaikh and N. P. Seeram, *Neurochemical Research*, 2016, **41**, 2836-2847.
145. P. F. Boasquivis, G. M. M. Silva, F. A. Paiva, R. M. Cavalcanti, C. V. Nunez and R. de Paula Oliveira, *Oxid. Med. Cell. Longevity*, 2018, DOI: 10.1155/2018/9241308, 9241308/9241301.
146. M. I. Prasanth, J. M. Brimson, S. Chuchawankul, M. Sukprasansap and T. Tencomnao, *Oxid. Med. Cell. Longevity*, 2019, DOI: 10.1155/2019/7024785, 7024785.
147. M. Sobeh, A. Esmat, G. Petruk, M. A. O. Abdelfattah, M. Dmirieh, D. M. Monti, A. B. Abdel-Naim and M. Wink, *J. Funct. Foods*, 2018, **41**, 223-231.
148. A. L. Tambara, L. de Los Santos Moraes, A. H. Dal Forno, J. R. Boldori, A. T. Goncalves Soares, C. de Freitas Rodrigues, L. R. B. Mariutti, A. Z. Mercadante, D. S. de Avila and C. C. Denardin, *Food Chem. Toxicol.*, 2018, **120**, 639-650.
149. H. Kilicgun, N. Arda and E. O. Ucar, *Pharmacogn. Mag.*, 2015, **11**, 356-359.
150. K. Barathikannan, B. Venkatadri, A. Khusro, N. Abdullah Al-Dhabi, P. Agastian, M. V. Arasu, H. S. Choi and Y. O. Kim, *BMC Complementary Altern. Med.*, 2016, **16**, 264/261.
151. J. Meng, M. Cheng, L. Liu, J. Sun, J. A. Condori-Apfata, D. Zhao and J. Tao, *Int. J. Food Prop.*, 2021, **24**, 1349-1366.
152. S.-H. Lee, H.-S. An, Y. W. Jung, E.-J. Lee, H.-Y. Lee, E.-S. Choi, S. W. An, H. Son, S.-J. Lee, J.-B. Kim and K.-J. Min, *Biogerontology*, 2014, **15**, 153-164.
153. W. Zhang, B. Zheng, N. Deng, H. Wang, T. Li and R. H. Liu, *J. Food Sci.*, 2020, **85**, 4367-4376.
154. L. F. M. de Melo, D. L. Gomes, L. F. D. Silva, L. M. P. Silva, M. L. Machado, C. O. M. Cadavid, S. M. Zucolotto, R. de Paula Oliveira, D. Y. A. C. D. Santos, H. A. O. Rocha and K. C. Scortecchi, *Oxid. Med. Cell. Longevity*, 2020, DOI: 10.1155/2020/3928706, 3928706.
155. H. Wang, J. Liu, T. Li and R. H. Liu, *Food Funct.*, 2018, **9**, 5273-5282.
156. S. Guha, O. Nataraja, C. G. Murbach, J. Dinh, E. C. Wilson, M. Cao, S. Zou and Y. Dong, *Nutrients*, 2014, **6**, 911-921.
157. S. Guha, M. Cao, R. M. Kane, A. M. Savino, S. Zou and Y. Dong, *Age (Dordr)*, 2013, **35**, 1559-1574.
158. D. A. Mendez, M. J. Fabra, I. Falco, G. Sanchez, P. Aranaz, A. Vettorazzi, A. Ribas-Agusti, C. J. Gonzalez-Navarro, M. Castellari, A. Martinez-Abad and A. Lopez-Rubio, *Food Funct.*, 2021, **12**, 7428-7439.

159. A. Elkhedir, A. Iqbal, A. Albahi, M. Tao, L. Rong and X. Xu, *Plant Foods Hum. Nutr. (N. Y., NY, U. S.)*, 2022, **77**, 30-36.
160. J. Liu, J. Meng, J. Du, X. Liu, Q. Pu, D. Di and C. Chen, *Molecules*, 2020, **25**, 3511.
161. L. Xiong, N. Deng, B. Zheng, T. Li and R. H. Liu, *Food Funct.*, 2021, **12**, 7851-7866.
162. J. Zhao, J. Yu, Q. Zhi, T. Yuan, X. Lei, K. Zeng and J. Ming, *Food Funct.*, 2021, **12**, 12647-12658.
163. H. Peixoto, M. Roxo, H. Koolen, F. da Silva, E. Silva, M. S. Braun, X. Wang and M. Wink, *Molecules*, 2018, **23**, 534/531.
164. X. Yang, P. Zhang, J. Wu, S. Xiong, N. Jin and Z. Huang, *J Ethnopharmacol*, 2012, **141**, 41-47.
165. K. Suchiang and N. H. Kayde, *Asian J. Pharm. Clin. Res.*, 2017, **10**, 361-367.
166. C. Moliner, V. Lopez, L. Barros, M. I. Dias, I. C. F. R. Ferreira, E. Langa and C. Gomez-Rincon, *Antioxidants*, 2020, **9**, 811.
167. Y. Nishioka, S. Nishikawa and T. Shibata, *Nat. Prod. Commun.*, 2020, **15**, 1934578X20917283.
168. G. Di Rosa, G. Brunetti, M. Scuto, A. T. Salinaro, E. J. Calabrese, R. Crea, C. Schmitz-Linneweber, V. Calabrese and N. Saul, *Int. J. Mol. Sci.*, 2020, **21**, 3893.
169. S. Luo, X. Jiang, L. Jia, C. Tan, M. Li, Q. Yang, Y. Du and C. Ding, *Molecules*, 2019, **24**, 704.
170. L.-G. Xiong, J.-A. Huang, J. Li, P.-H. Yu, Z. Xiong, J.-W. Zhang, Y.-S. Gong, Z.-H. Liu and J.-H. Chen, *J. Agric. Food Chem.*, 2014, **62**, 11163-11169.
171. P. Yuan, L.-y. Pan, L.-g. Xiong, J.-w. Tong, J. Li, J.-a. Huang, Y.-s. Gong and Z.-h. Liu, *Food Funct.*, 2018, **9**, 3798-3806.
172. S. Abbas and M. Wink, *Antioxidants*, 2014, **3**, 129.
173. S. Zhang, C. Duangjan, T. Tencomnao, J. Liu, J. Lin and M. Wink, *Food Funct.*, 2020, **11**, 8179-8192.
174. S.-Y. Jin, D.-Q. Li, S. Lu, L.-T. Han, D.-H. Liu, Z. Huang, B.-S. Huang and Y. Cao, *J. Funct. Foods*, 2019, **58**, 218-226.
175. G. Sandner, A. S. Mueller, X. Zhou, V. Stadlbauer, B. Schwarzingler, C. Schwarzingler, U. Wenzel, K. Maenner, J. D. van der Klis, S. Hirtenlehner, T. Aumiller and J. Weghuber, *Molecules*, 2020, **25**, 835.
176. A. Panossian, E.-J. Seo and T. Efferth, *Phytomedicine*, 2018, **50**, 257-284.
177. M. L. Machado, L. P. Arantes, P. Gubert, D. C. Zamberlan, T. C. da Silva, T. L. da Silveira, A. Boligon and F. A. A. Soares, *PLoS One*, 2018, **13**, e0204023/0204021.
178. M. E. Lima, A. C. Colpo, W. G. Salgueiro, G. E. Sardinha, D. S. Avila and V. Folmer, *Int J Environ Res Public Health*, 2014, **11**, 10091-10104.
179. F. A. Paiva, L. d. F. Bonomo, P. F. Boasquivis, I. T. B. R. de Paula, J. F. d. C. Guerra, W. M. Leal, M. E. Silva, M. L. Pedrosa and R. d. P. Oliveira, *Oxid Med Cell Longev*, 2015, **2015**, 740162.
180. C. Moliner, L. Barros, M. I. Dias, V. Lopez, E. Langa, I. C. F. R. Ferreira and C. Gomez-Rincon, *Nutrients*, 2018, **10**, 2002/2001.
181. R. Li, M. Tao, T. Xu, Y. Huang, D. Zogona, S. Pan, T. Wu and X. Xu, *J. Sci. Food Agric.*, 2022, **102**, 4532-4541.
182. M. Jang, K.-H. Kim and G.-H. Kim, *Antioxidants*, 2020, **9**, 200.
183. W. Liu, Y. Guan, S. Qiao, J. Wang, K. Bao, Z. Mao, L. Liao, A. Moskalev, B. Jiang, J. Zhu, C. Xia, J. Li and Z. Hu, *Oxid. Med. Cell. Longevity*, 2021, DOI: 10.1155/2021/9942090, 9942090.
